# Supplementary material for: Performance of a Pilot-Scale Continuous Flow Ozone-Based Hospital Wastewater Treatment System
Source: MDPI journal article supplement (doi:10.3390/antibiotics12050932), 2023-05-19
Supplement: s1 [file s1]

**Table S1. Summary of water quality parameters during hospital wastewater treatment with ozone (N.A.: Not available.)**

| Date (yyyy/mm/dd) | Days | BOD (mg/L)                       |                                     |                                      | COD (mg/L)                       |                                     |                                      | SS (mg/L)                        |                                     |                                      | TN (mg/L)                        |                                     |                                      |
|-------------------|------|----------------------------------|-------------------------------------|--------------------------------------|----------------------------------|-------------------------------------|--------------------------------------|----------------------------------|-------------------------------------|--------------------------------------|----------------------------------|-------------------------------------|--------------------------------------|
|                   |      | Original storage tank (Influent) | Wastewater treatment tank 1 (ozone) | Wastewater treatment tank 2 (UV-LED) | Original storage tank (Influent) | Wastewater treatment tank 1 (ozone) | Wastewater treatment tank 2 (UV-LED) | Original storage tank (Influent) | Wastewater treatment tank 1 (ozone) | Wastewater treatment tank 2 (UV-LED) | Original storage tank (Influent) | Wastewater treatment tank 1 (ozone) | Wastewater treatment tank 2 (UV-LED) |
| 2022/11/24        | 0    | 296                              | N.A.                                | N.A.                                 | 111                              | N.A.                                | N.A.                                 | 52                               | N.A.                                | N.A.                                 | 81.2                             | N.A.                                | N.A.                                 |
| 2022/11/25        | 1    | 200                              | 155                                 | 152                                  | 94                               | 131                                 | 104                                  | 56                               | 95                                  | 35.5                                 | 82.3                             | 85.4                                | 86.9                                 |
| 2022/11/28        | 4    | 252                              | 176                                 | 140                                  | 118                              | 153                                 | 120                                  | 85                               | 171                                 | 82                                   | 84.1                             | 84.2                                | 83.5                                 |
| 2022/11/30        | 6    | 278                              | 253                                 | 202                                  | 111                              | 131                                 | 108                                  | 113                              | 219                                 | 111                                  | 88.8                             | 87.5                                | 84.9                                 |
| 2022/12/2         | 8    | 244                              | 192                                 | 192                                  | 126                              | 131                                 | 130                                  | 131                              | 154                                 | 97                                   | 71.5                             | 77.6                                | 77.1                                 |
| 2022/12/9         | 15   | N.A.                             | N.A.                                | N.A.                                 |
| 2022/12/23        | 29   | N.A.                             | N.A.                                | N.A.                                 |

| Date (yyyy/mm/dd) | Days | DNA conc. (ng/μL)                |                                     |                                      | Metagenomic DNA-Seq (total reads) |                                     |                                      |
|-------------------|------|----------------------------------|-------------------------------------|--------------------------------------|-----------------------------------|-------------------------------------|--------------------------------------|
|                   |      | Original storage tank (Influent) | Wastewater treatment tank 1 (ozone) | Wastewater treatment tank 2 (UV-LED) | Original storage tank (Influent)  | Wastewater treatment tank 1 (ozone) | Wastewater treatment tank 2 (UV-LED) |
| 2022/11/24        | 0    | 0.5                              | 1.3                                 | 1.6                                  | 11,582,494                        | 13,422,972                          | 16,972,690                           |
| 2022/11/25        | 1    | 1.1                              | 0.2                                 | 0.3                                  | 9,522,760                         | 4,136,692                           | 1,278,874                            |
| 2022/11/28        | 4    | 0.7                              | 0.4                                 | 0.5                                  | 10,930,972                        | 3,915,464                           | 3,510,990                            |
| 2022/11/30        | 6    | 1.2                              | 0.9                                 | 0.8                                  | 14,612,202                        | 8,300,318                           | 8,760,408                            |
| 2022/12/2         | 8    | 0.6                              | 0.4                                 | 0.6                                  | 6,286,906                         | 4,652,696                           | 6,925,536                            |
| 2022/12/9         | 15   | 0.7                              | 0.5                                 | 0.7                                  | 7,694,732                         | 3,947,254                           | 7,833,522                            |
| 2022/12/23        | 29   | 0.8                              | 0.5                                 | 0.7                                  | 9,198,754                         | 3,882,996                           | 6,123,684                            |
