# Supplementary material for: Performance of a Pilot-Scale Continuous Flow Ozone-Based Hospital Wastewater Treatment System
Source: MDPI journal article supplement (doi:10.3390/antibiotics12050932), 2023-05-19
Supplement: s1 [file s1]

**Table S2.** All raw read sequence files are available from the DRA/SRA database

| ProProject | ProProject SubData (Run Subname) | SubSample | SubSample Subname | Sample Name | Experiment          | Experiment alias | Experiment Title                       | Library Source                                   | Library Strategy | Library Name | Library Layout | Run       | Run Alias                       | Run Title                                        | Run Files                                                             |
|------------|----------------------------------|-----------|-------------------|-------------|---------------------|------------------|----------------------------------------|--------------------------------------------------|------------------|--------------|----------------|-----------|---------------------------------|--------------------------------------------------|-----------------------------------------------------------------------|
| PRD89636   | PSUB01400                        | DR0A15618 | SAM005057670      | SB02BA0403  | STN-221124-Influent | DRX424685        | tsuyoshi_sakizuka_0071_Experiment_0001 | NextSeq500 paired end sequencing of SAM005057670 | GENOMIC          | WGS          | PAIRED         | DRA439511 | tsuyoshi_sakizuka_0071_Run_0001 | NextSeq500 paired end sequencing of SAM005057670 | STN-221124-Influent_read1_fastq.gz;STN-221124-Influent_read2_fastq.gz |
| PRD89636   | PSUB01400                        | DR0A15618 | SAM005057671      | SB02BA0403  | STN-221124-Ozone    | DRX424686        | tsuyoshi_sakizuka_0071_Experiment_0002 | NextSeq500 paired end sequencing of SAM005057671 | GENOMIC          | WGS          | PAIRED         | DRA439512 | tsuyoshi_sakizuka_0071_Run_0002 | NextSeq500 paired end sequencing of SAM005057671 | STN-221124-OzoneUv_read1_fastq.gz;STN-221124-OzoneUv_read2_fastq.gz   |
| PRD89636   | PSUB01400                        | DR0A15618 | SAM005057672      | SB02BA0403  | STN-221124-OzoneUv  | DRX424687        | tsuyoshi_sakizuka_0071_Experiment_0003 | NextSeq500 paired end sequencing of SAM005057672 | GENOMIC          | WGS          | PAIRED         | DRA439513 | tsuyoshi_sakizuka_0071_Run_0003 | NextSeq500 paired end sequencing of SAM005057672 | STN-221124-OzoneUv_read1_fastq.gz;STN-221124-OzoneUv_read2_fastq.gz   |
| PRD89636   | PSUB01400                        | DR0A15618 | SAM005057673      | SB02BA0403  | STN-221125-Influent | DRX424688        | tsuyoshi_sakizuka_0071_Experiment_0004 | NextSeq500 paired end sequencing of SAM005057673 | GENOMIC          | WGS          | PAIRED         | DRA439514 | tsuyoshi_sakizuka_0071_Run_0004 | NextSeq500 paired end sequencing of SAM005057673 | STN-221125-Influent_read1_fastq.gz;STN-221125-Influent_read2_fastq.gz |
| PRD89636   | PSUB01400                        | DR0A15618 | SAM005057674      | SB02BA0403  | STN-221125-Ozone    | DRX424689        | tsuyoshi_sakizuka_0071_Experiment_0005 | NextSeq500 paired end sequencing of SAM005057674 | GENOMIC          | WGS          | PAIRED         | DRA439515 | tsuyoshi_sakizuka_0071_Run_0005 | NextSeq500 paired end sequencing of SAM005057674 | STN-221125-OzoneUv_read1_fastq.gz;STN-221125-OzoneUv_read2_fastq.gz   |
| PRD89636   | PSUB01400                        | DR0A15618 | SAM005057675      | SB02BA0403  | STN-221125-OzoneUv  | DRX424690        | tsuyoshi_sakizuka_0071_Experiment_0006 | NextSeq500 paired end sequencing of SAM005057675 | GENOMIC          | WGS          | PAIRED         | DRA439516 | tsuyoshi_sakizuka_0071_Run_0006 | NextSeq500 paired end sequencing of SAM005057675 | STN-221125-OzoneUv_read1_fastq.gz;STN-221125-OzoneUv_read2_fastq.gz   |
| PRD89636   | PSUB01400                        | DR0A15618 | SAM005057676      | SB02BA0403  | STN-221128-Influent | DRX424691        | tsuyoshi_sakizuka_0071_Experiment_0007 | NextSeq500 paired end sequencing of SAM005057676 | GENOMIC          | WGS          | PAIRED         | DRA439517 | tsuyoshi_sakizuka_0071_Run_0007 | NextSeq500 paired end sequencing of SAM005057676 | STN-221128-Influent_read1_fastq.gz;STN-221128-Influent_read2_fastq.gz |
| PRD89636   | PSUB01400                        | DR0A15618 | SAM005057677      | SB02BA0403  | STN-221128-Ozone    | DRX424692        | tsuyoshi_sakizuka_0071_Experiment_0008 | NextSeq500 paired end sequencing of SAM005057677 | GENOMIC          | WGS          | PAIRED         | DRA439518 | tsuyoshi_sakizuka_0071_Run_0008 | NextSeq500 paired end sequencing of SAM005057677 | STN-221128-OzoneUv_read1_fastq.gz;STN-221128-OzoneUv_read2_fastq.gz   |
| PRD89636   | PSUB01400                        | DR0A15618 | SAM005057678      | SB02BA0403  | STN-221128-OzoneUv  | DRX424693        | tsuyoshi_sakizuka_0071_Experiment_0009 | NextSeq500 paired end sequencing of SAM005057678 | GENOMIC          | WGS          | PAIRED         | DRA439519 | tsuyoshi_sakizuka_0071_Run_0009 | NextSeq500 paired end sequencing of SAM005057678 | STN-221128-OzoneUv_read1_fastq.gz;STN-221128-OzoneUv_read2_fastq.gz   |
| PRD89636   | PSUB01400                        | DR0A15618 | SAM005057679      | SB02BA0403  | STN-221130-Influent | DRX424694        | tsuyoshi_sakizuka_0071_Experiment_0010 | NextSeq500 paired end sequencing of SAM005057679 | GENOMIC          | WGS          | PAIRED         | DRA439520 | tsuyoshi_sakizuka_0071_Run_0010 | NextSeq500 paired end sequencing of SAM005057679 | STN-221130-Influent_read1_fastq.gz;STN-221130-Influent_read2_fastq.gz |
| PRD89636   | PSUB01400                        | DR0A15618 | SAM005057680      | SB02BA0403  | STN-221130-Ozone    | DRX424695        | tsuyoshi_sakizuka_0071_Experiment_0011 | NextSeq500 paired end sequencing of SAM005057680 | GENOMIC          | WGS          | PAIRED         | DRA439521 | tsuyoshi_sakizuka_0071_Run_0011 | NextSeq500 paired end sequencing of SAM005057680 | STN-221130-OzoneUv_read1_fastq.gz;STN-221130-OzoneUv_read2_fastq.gz   |
| PRD89636   | PSUB01400                        | DR0A15618 | SAM005057681      | SB02BA0403  | STN-221130-OzoneUv  | DRX424696        | tsuyoshi_sakizuka_0071_Experiment_0012 | NextSeq500 paired end sequencing of SAM005057681 | GENOMIC          | WGS          | PAIRED         | DRA439522 | tsuyoshi_sakizuka_0071_Run_0012 | NextSeq500 paired end sequencing of SAM005057681 | STN-221130-OzoneUv_read1_fastq.gz;STN-221130-OzoneUv_read2_fastq.gz   |
| PRD89636   | PSUB01400                        | DR0A15618 | SAM005057682      | SB02BA0403  | STN-221202-Influent | DRX424697        | tsuyoshi_sakizuka_0071_Experiment_0013 | NextSeq500 paired end sequencing of SAM005057682 | GENOMIC          | WGS          | PAIRED         | DRA439523 | tsuyoshi_sakizuka_0071_Run_0013 | NextSeq500 paired end sequencing of SAM005057682 | STN-221202-Influent_read1_fastq.gz;STN-221202-Influent_read2_fastq.gz |
| PRD89636   | PSUB01400                        | DR0A15618 | SAM005057683      | SB02BA0403  | STN-221202-Ozone    | DRX424698        | tsuyoshi_sakizuka_0071_Experiment_0014 | NextSeq500 paired end sequencing of SAM005057683 | GENOMIC          | WGS          | PAIRED         | DRA439524 | tsuyoshi_sakizuka_0071_Run_0014 | NextSeq500 paired end sequencing of SAM005057683 | STN-221202-OzoneUv_read1_fastq.gz;STN-221202-OzoneUv_read2_fastq.gz   |
| PRD89636   | PSUB01400                        | DR0A15618 | SAM005057684      | SB02BA0403  | STN-221202-OzoneUv  | DRX424700        | tsuyoshi_sakizuka_0071_Experiment_0015 | NextSeq500 paired end sequencing of SAM005057684 | GENOMIC          | WGS          | PAIRED         | DRA439526 | tsuyoshi_sakizuka_0071_Run_0015 | NextSeq500 paired end sequencing of SAM005057684 | STN-221202-OzoneUv_read1_fastq.gz;STN-221202-OzoneUv_read2_fastq.gz   |
| PRD89636   | PSUB01400                        | DR0A15618 | SAM005057685      | SB02BA0403  | STN-221209-Influent | DRX424701        | tsuyoshi_sakizuka_0071_Experiment_0016 | NextSeq500 paired end sequencing of SAM005057685 | GENOMIC          | WGS          | PAIRED         | DRA439527 | tsuyoshi_sakizuka_0071_Run_0016 | NextSeq500 paired end sequencing of SAM005057685 | STN-221209-Influent_read1_fastq.gz;STN-221209-Influent_read2_fastq.gz |
| PRD89636   | PSUB01400                        | DR0A15618 | SAM005057686      | SB02BA0403  | STN-221209-Ozone    | DRX424701        | tsuyoshi_sakizuka_0071_Experiment_0017 | NextSeq500 paired end sequencing of SAM005057686 | GENOMIC          | WGS          | PAIRED         | DRA439527 | tsuyoshi_sakizuka_0071_Run_0017 | NextSeq500 paired end sequencing of SAM005057686 | STN-221209-OzoneUv_read1_fastq.gz;STN-221209-OzoneUv_read2_fastq.gz   |
| PRD89636   | PSUB01400                        | DR0A15618 | SAM005057687      | SB02BA0403  | STN-221209-OzoneUv  | DRX424702        | tsuyoshi_sakizuka_0071_Experiment_0018 | NextSeq500 paired end sequencing of SAM005057687 | GENOMIC          | WGS          | PAIRED         | DRA439528 | tsuyoshi_sakizuka_0071_Run_0018 | NextSeq500 paired end sequencing of SAM005057687 | STN-221209-OzoneUv_read1_fastq.gz;STN-221209-OzoneUv_read2_fastq.gz   |
| PRD89636   | PSUB01400                        | DR0A15618 | SAM005057688      | SB02BA0403  | STN-221223-Influent | DRX424703        | tsuyoshi_sakizuka_0071_Experiment_0019 | NextSeq500 paired end sequencing of SAM005057688 | GENOMIC          | WGS          | PAIRED         | DRA439529 | tsuyoshi_sakizuka_0071_Run_0019 | NextSeq500 paired end sequencing of SAM005057688 | STN-221223-Influent_read1_fastq.gz;STN-221223-Influent_read2_fastq.gz |
| PRD89636   | PSUB01400                        | DR0A15618 | SAM005057689      | SB02BA0403  | STN-221223-Ozone    | DRX424704        | tsuyoshi_sakizuka_0071_Experiment_0020 | NextSeq500 paired end sequencing of SAM005057689 | GENOMIC          | WGS          | PAIRED         | DRA439530 | tsuyoshi_sakizuka_0071_Run_0020 | NextSeq500 paired end sequencing of SAM005057689 | STN-221223-OzoneUv_read1_fastq.gz;STN-221223-OzoneUv_read2_fastq.gz   |
| PRD89636   | PSUB01400                        | DR0A15618 | SAM005057670      | SB02BA0403  | STN-221223-OzoneUv  | DRX424705        | tsuyoshi_sakizuka_0071_Experiment_0021 | NextSeq500 paired end sequencing of SAM005057670 | GENOMIC          | WGS          | PAIRED         | DRA439531 | tsuyoshi_sakizuka_0071_Run_0021 | NextSeq500 paired end sequencing of SAM005057670 | STN-221223-OzoneUv_read1_fastq.gz;STN-221223-OzoneUv_read2_fastq.gz   |
