# Supplementary material for: Performance of a Pilot-Scale Continuous Flow Ozone-Based Hospital Wastewater Treatment System
Source: MDPI journal article supplement (doi:10.3390/antibiotics12050932), 2023-05-19
Supplement: s1 [file s1]

**Table S5. Counts of sequencing reads detected for each antimicrobial resistance gene (ARG) by metagenomic DNA-Seq analysis.**

| Tank ID                                    | Original storage tank (influent) |            |            |            |           |           |            |            |            |            |            |           | Wastewater treatment tank 1 (ozone) |            |            |            |            |            |           |           |            |            |            |            | Wastewater treatment tank 2 (UV-LED) |           |           |            |            |            |            |            |           |           |            |           |           |           |           |     |     |     |    |
|--------------------------------------------|----------------------------------|------------|------------|------------|-----------|-----------|------------|------------|------------|------------|------------|-----------|-------------------------------------|------------|------------|------------|------------|------------|-----------|-----------|------------|------------|------------|------------|--------------------------------------|-----------|-----------|------------|------------|------------|------------|------------|-----------|-----------|------------|-----------|-----------|-----------|-----------|-----|-----|-----|----|
| Days (post treatment)                      | 0                                |            | 1          |            | 4         |           | 6          |            | 8          |            | 15         |           | 29                                  |            | 0          |            | 1          |            | 4         |           | 6          |            | 8          |            | 15                                   |           | 29        |            | 0          |            | 1          |            | 4         |           | 6          |           | 8         |           | 15        |     | 29  |     |    |
| Date (yyyy/mm/dd)                          | 2022/11/24                       | 2022/11/25 | 2022/11/28 | 2022/11/30 | 2022/12/2 | 2022/12/9 | 2022/12/23 | 2022/11/24 | 2022/11/25 | 2022/11/28 | 2022/11/30 | 2022/12/2 | 2022/12/9                           | 2022/12/23 | 2022/11/24 | 2022/11/25 | 2022/11/28 | 2022/11/30 | 2022/12/2 | 2022/12/9 | 2022/12/23 | 2022/11/24 | 2022/11/25 | 2022/11/28 | 2022/11/30                           | 2022/12/2 | 2022/12/9 | 2022/12/23 | 2022/11/24 | 2022/11/25 | 2022/11/28 | 2022/11/30 | 2022/12/2 | 2022/12/9 | 2022/12/23 |           |           |           |           |     |     |     |    |
| DNA conc. (ng/μL)                          | 0.5                              | 1.1        | 0.7        | 1.2        | 0.6       | 0.7       | 0.8        | 1.3        | 0.2        | 0.4        | 0.9        | 0.4       | 0.5                                 | 0.5        | 1.6        | 0.3        | 0.5        | 0.8        | 0.8       | 0.7       | 0.7        | 0.7        | 0.7        | 0.7        | 0.7                                  | 0.7       | 0.7       | 0.7        | 0.7        | 0.7        | 0.7        | 0.7        | 0.7       | 0.7       | 0.7        | 0.7       | 0.7       | 0.7       | 0.7       |     |     |     |    |
| Metagenomic DNA-Seq (total reads)          | 11,582,944                       | 9,522,760  | 10,930,972 | 14,612,292 | 6,266,006 | 7,804,732 | 9,109,754  | 13,422,972 | 4,136,692  | 3,915,644  | 8,303,814  | 4,652,696 | 3,947,254                           | 3,882,996  | 16,972,968 | 1,278,874  | 1,353,090  | 8,760,408  | 6,925,536 | 7,833,522 | 6,123,684  | 7,833,522  | 6,123,684  | 7,833,522  | 6,123,684                            | 7,833,522 | 6,123,684 | 7,833,522  | 6,123,684  | 7,833,522  | 6,123,684  | 7,833,522  | 6,123,684 | 7,833,522 | 6,123,684  | 7,833,522 | 6,123,684 | 7,833,522 | 6,123,684 |     |     |     |    |
| ARGs subtype                               |                                  |            |            |            |           |           |            |            |            |            |            |           |                                     |            |            |            |            |            |           |           |            |            |            |            |                                      |           |           |            |            |            |            |            |           |           |            |           |           |           |           |     |     |     |    |
| Total ARGs                                 | 5,128                            | 19,618     | 12,381     | 20,391     | 4,886     | 6,873     | 7,804      | 27,822     | 4,320      | 3,561      | 6,794      | 3,165     | 2,855                               | 2,976      | 27,489     | 1,387      | 2,696      | 6,380      | 5,171     | 6,867     | 4,799      | 1,719      | 2,332      | 1,328      | 2,458                                | 275       | 483       | 509        | 4,049      | 350        | 176        | 372        | 100       | 126       | 85         | 3,256     | 91        | 151       | 468       | 163 | 296 | 121 |    |
| beta_lactam_GES-15                         | 1,420                            | 1,684      | 1,043      | 1,771      | 274       | 469       | 477        | 2,980      | 337        | 204        | 373        | 120       | 151                                 | 127        | 2,502      | 112        | 135        | 510        | 226       | 334       | 243        | 1,420      | 1,684      | 1,043      | 1,771                                | 274       | 469       | 477        | 2,980      | 337        | 204        | 373        | 120       | 151       | 127        | 2,502     | 112       | 135       | 510       | 226 | 334 | 243 |    |
| beta_lactam_GES-14                         | 768                              | 1,060      | 581        | 1,043      | 140       | 230       | 254        | 1,835      | 169        | 62         | 188        | 45        | 66                                  | 35         | 1,169      | 61         | 68         | 228        | 81        | 190       | 59         | 768        | 1,060      | 581        | 1,043                                | 140       | 230       | 254        | 1,835      | 169        | 62         | 188        | 45        | 66        | 35         | 1,169     | 61        | 68        | 228       | 81  | 190 | 59  |    |
| beta_lactam_OXA-1                          | 678                              | 916        | 524        | 857        | 83        | 146       | 145        | 1,528      | 125        | 54         | 115        | 23        | 26                                  | 14         | 1,461      | 48         | 31         | 99         | 36        | 61        | 12         | 678        | 916        | 524        | 857                                  | 83        | 146       | 145        | 1,528      | 125        | 54         | 115        | 23        | 26        | 14         | 1,461     | 48        | 31        | 99        | 36  | 61  | 12  |    |
| tetracycline_tet(39)                       | 274                              | 1,202      | 259        | 1,763      | 173       | 191       | 229        | 1,336      | 234        | 149        | 483        | 91        | 141                                 | 175        | 2,044      | 118        | 73         | 348        | 212       | 395       | 372        | 274        | 1,202      | 259        | 1,763                                | 173       | 191       | 229        | 1,336      | 234        | 149        | 483        | 91        | 141       | 175        | 2,044     | 118       | 73        | 348       | 212 | 395 | 372 |    |
| beta_lactam_GES-14AC(6)-31                 | 518                              | 728        | 341        | 729        | 79        | 149       | 134        | 1,102      | 114        | 42         | 126        | 33        | 42                                  | 30         | 866        | 39         | 30         | 113        | 43        | 69        | 43         | 518        | 728        | 341        | 729                                  | 79        | 149       | 134        | 1,102      | 114        | 42         | 126        | 33        | 42        | 30         | 866       | 39        | 30        | 113       | 43  | 69  | 43  |    |
| beta_lactam_GES-5                          | 380                              | 525        | 291        | 557        | 71        | 114       | 129        | 897        | 73         | 45         | 82         | 27        | 33                                  | 27         | 2,604      | 27         | 36         | 122        | 36        | 73        | 35         | 380        | 525        | 291        | 557                                  | 71        | 114       | 129        | 897        | 73         | 45         | 82         | 27        | 33        | 27         | 2,604     | 27        | 36        | 122       | 36  | 73  | 35  |    |
| aminoglycoside_aadA                        | 318                              | 351        | 213        | 382        | 79        | 109       | 102        | 660        | 74         | 46         | 72         | 24        | 30                                  | 27         | 563        | 21         | 37         | 132        | 53        | 88        | 57         | 318        | 351        | 213        | 382                                  | 79        | 109       | 102        | 660        | 74         | 46         | 72         | 24        | 30        | 27         | 563       | 21        | 37        | 132       | 53  | 88  | 57  |    |
| multidrug_qacEdelta1                       | 293                              | 362        | 214        | 371        | 59        | 99        | 98         | 616        | 73         | 45         | 92         | 27        | 18                                  | 23         | 482        | 26         | 44         | 106        | 50        | 62        | 46         | 293        | 362        | 214        | 371                                  | 59        | 99        | 98         | 616        | 73         | 45         | 92         | 27        | 18        | 23         | 482       | 26        | 44        | 106       | 50  | 62  | 46  |    |
| tetracycline_tet(36)                       | 459                              | 229        | 494        | 437        | 74        | 198       | 297        | 566        | 60         | 99         | 108        | 38        | 30                                  | 41         | 618        | 21         | 70         | 92         | 30        | 72        | 64         | 459        | 229        | 494        | 437                                  | 74        | 198       | 297        | 566        | 60         | 99         | 108        | 38        | 30        | 41         | 618       | 21        | 70        | 92        | 30  | 72  | 64  |    |
| aminoglycoside_APH(6)-Id                   | 263                              | 321        | 187        | 367        | 102       | 162       | 255        | 510        | 86         | 67         | 123        | 63        | 68                                  | 58         | 614        | 37         | 34         | 143        | 65        | 128       | 65         | 263        | 321        | 187        | 367                                  | 102       | 162       | 255        | 510        | 86         | 67         | 123        | 63        | 68        | 58         | 614       | 37        | 34        | 143       | 65  | 128 | 65  |    |
| aminoglycoside_APH(3)-Ib                   | 239                              | 246        | 156        | 273        | 84        | 139       | 172        | 474        | 70         | 65         | 108        | 43        | 38                                  | 34         | 497        | 18         | 35         | 107        | 61        | 89        | 37         | 239        | 246        | 156        | 273                                  | 84        | 139       | 172        | 474        | 70         | 65         | 108        | 43        | 38        | 34         | 497       | 18        | 35        | 107       | 61  | 89  | 37  |    |
| beta_lactam_GES-20                         | 178                              | 212        | 151        | 232        | 29        | 45        | 49         | 371        | 27         | 31         | 35         | 16        | 16                                  | 8          | 331        | 10         | 20         | 43         | 16        | 35        | 16         | 178        | 212        | 151        | 232                                  | 29        | 45        | 49         | 371        | 27         | 31         | 35         | 16        | 16        | 8          | 331       | 10        | 20        | 43        | 16  | 35  | 16  |    |
| beta_lactam_tet(10)                        | 318                              | 289        | 395        | 503        | 351       | 275       | 382        | 334        | 86         | 63         | 196        | 150       | 50                                  | 86         | 412        | 22         | 32         | 79         | 232       | 54        | 37         | 318        | 289        | 395        | 503                                  | 351       | 275       | 382        | 334        | 86         | 63         | 196        | 150       | 50        | 86         | 412       | 22        | 32        | 79        | 232 | 54  | 37  |    |
| beta_lactam_GES-4                          | 137                              | 156        | 104        | 213        | 36        | 74        | 70         | 306        | 60         | 33         | 40         | 29        | 29                                  | 17         | 264        | 10         | 27         | 96         | 35        | 68        | 22         | 137        | 156        | 104        | 213                                  | 36        | 74        | 70         | 306        | 60         | 33         | 40         | 29        | 29        | 17         | 264       | 10        | 27        | 96        | 35  | 68  | 22  |    |
| beta_lactam_GES-21                         | 127                              | 172        | 87         | 163        | 25        | 17        | 37         | 293        | 19         | 6          | 16         | 12        | 11                                  | 6          | 214        | 7          | 6          | 30         | 12        | 22        | 6          | 127        | 172        | 87         | 163                                  | 25        | 17        | 37         | 293        | 19         | 6          | 16         | 12        | 11        | 6          | 214       | 7         | 6         | 30        | 12  | 22  | 6   |    |
| beta_lactam_OXA-58                         | 94                               | 47         | 52         | 53         | 16        | 64        | 147        | 289        | 98         | 183        | 233        | 73        | 127                                 | 185        | 595        | 35         | 120        | 49         | 211       | 560       | 410        | 94         | 47         | 52         | 53                                   | 16        | 64        | 147        | 289        | 98         | 183        | 233        | 73        | 127       | 185        | 595       | 35        | 120       | 49        | 211 | 560 | 410 |    |
| beta_lactam_OXA-140                        | 109                              | 149        | 82         | 124        | 8         | 14        | 21         | 258        | 19         | 13         | 22         | 5         | 3                                   | 2          | 186        | 8          | 6          | 12         | 8         | 8         | 5          | 109        | 149        | 82         | 124                                  | 8         | 14        | 21         | 258        | 19         | 13         | 22         | 5         | 3         | 2          | 186       | 8         | 6         | 12        | 8   | 8   | 5   |    |
| multidrug_qacE                             | 116                              | 132        | 77         | 127        | 18        | 21        | 40         | 250        | 29         | 15         | 33         | 8         | 9                                   | 12         | 217        | 15         | 19         | 37         | 17        | 27        | 20         | 116        | 132        | 77         | 127                                  | 18        | 21        | 40         | 250        | 29         | 15         | 33         | 8         | 9         | 12         | 217       | 15        | 19        | 37        | 17  | 27  | 20  |    |
| beta_lactam_GES-6                          | 105                              | 141        | 111        | 185        | 20        | 45        | 44         | 246        | 28         | 14         | 19         | 7         | 10                                  | 6          | 242        | 11         | 13         | 40         | 7         | 22        | 8          | 105        | 141        | 111        | 185                                  | 20        | 45        | 44         | 246        | 28         | 14         | 19         | 7         | 10        | 6          | 242       | 11        | 13        | 40        | 7   | 22  | 8   |    |
| polymyxin_rna                              | 200                              | 164        | 107        | 175        | 43        | 62        | 36         | 241        | 38         | 30         | 78         | 33        | 16                                  | 29         | 233        | 11         | 18         | 50         | 36        | 30        | 42         | 200        | 164        | 107        | 175                                  | 43        | 62        | 36         | 241        | 38         | 30         | 78         | 33        | 16        | 29         | 233       | 11        | 18        | 50        | 36  | 30  | 42  |    |
| polymyxin_ugd                              | 175                              | 145        | 143        | 208        | 68        | 84        | 103        | 237        | 65         | 53         | 81         | 59        | 37                                  | 29         | 244        | 17         | 31         | 79         | 59        | 73        | 67         | 175        | 145        | 143        | 208                                  | 68        | 84        | 103        | 237        | 65         | 53         | 81         | 59        | 37        | 29         | 244       | 17        | 31        | 79        | 59  | 73  | 67  |    |
| beta_lactam_CMY-8                          | 84                               | 107        | 51         | 94         | 17        | 13        | 14         | 210        | 27         | 4          | 26         | 4         | 4                                   | 2          | 177        | 8          | 6          | 16         | 2         | 4         | 2          | 84         | 107        | 51         | 94                                   | 17        | 13        | 14         | 210        | 27         | 4          | 26         | 4         | 4         | 2          | 177       | 8         | 6         | 16        | 2   | 4   | 2   |    |
| bacitracin_bacA                            | 184                              | 182        | 192        | 224        | 115       | 169       | 189        | 193        | 107        | 98         | 163        | 105       | 75                                  | 93         | 259        | 34         | 72         | 122        | 144       | 160       | 142        | 184        | 182        | 192        | 224                                  | 115       | 169       | 189        | 193        | 107        | 98         | 163        | 105       | 75        | 93         | 259       | 34        | 72        | 122       | 144 | 160 | 142 |    |
| beta_lactam_tet(9)                         | 225                              | 178        | 102        | 225        | 157       | 179       | 201        | 179        | 101        | 90         | 161        | 137       | 3                                   | 9          | 187        | 3          | 6          | 19         | 63        | 11        | 12         | 225        | 178        | 102        | 225                                  | 157       | 179       | 201        | 179        | 101        | 90         | 161        | 137       | 3         | 9          | 187       | 3         | 6         | 19        | 63  | 11  | 12  |    |
| aminoglycoside_aadS                        | 175                              | 62         | 145        | 63         | 26        | 56        | 57         | 161        | 13         | 18         | 32         | 12        | 9                                   | 25         | 265        | 5          | 19         | 48         | 18        | 45        | 11         | 175        | 62         | 145        | 63                                   | 26        | 56        | 57         | 161        | 13         | 18         | 32         | 12        | 9         | 25         | 265       | 5         | 19        | 48        | 18  | 45  | 11  |    |
| beta_lactam_APH(3)-Via                     | 66                               | 60         | 64         | 118        | 20        | 44        | 60         | 148        | 27         | 15         | 25         | 10        | 21                                  | 14         | 109        | 9          | 24         | 125        | 36        | 118       | 46         | 66         | 60         | 64         | 118                                  | 20        | 44        | 60         | 148        | 27         | 15         | 25         | 10        | 21        | 14         | 109       | 9         | 24        | 125       | 36  | 118 | 46  |    |
| macrolide-lincosamide-streptogramin_mef(B) | 173                              | 67         | 143        | 126        | 19        | 40        | 43         | 144        | 16         | 21         | 38         | 4         | 6                                   | 11         | 150        | 3          | 14         | 20         | 9         | 2         | 11         | 173        | 67         | 143        | 126                                  | 19        | 40        | 43         | 144        | 16         | 21         | 38         | 4         | 6         | 11         | 150       | 3         | 14        | 20        | 9   | 2   | 11  |    |
| tetracycline_tet(10)                       | 226                              | 89         | 135        | 113        | 88        | 73        | 99         | 143        | 27         | 22         | 31         | 43        | 11                                  | 15         | 153        | 8          | 12         | 20         | 44        | 20        | 7          | 226        | 89         | 135        | 113                                  | 88        | 73        | 99         | 143        | 27         | 22         | 31         | 43        | 11        | 15         | 153       | 8         | 12        | 20        | 44  | 20  | 7   |    |
| beta_lactam_OXA-464                        | 38                               | 62         | 43         | 74         | 8         | 24        | 26         | 139        | 9          | 5          | 12         | 6         | 8                                   | 6          | 129        | 5          | 5          | 5          | 5         | 9         | 19         | 22         | 38         | 62         | 43                                   | 74        | 8         | 24         | 26         | 139        | 9          | 5          | 12        | 6         | 8          | 6         | 129       | 5         | 5         | 5   | 5   | 9   | 19 |
| multidrug_qacH                             | 73                               | 45         | 47         | 92         | 16        | 32        | 32         | 129        | 15         | 13         | 26         | 13        | 11                                  | 8          | 135        | 3          | 17         | 47         | 29        | 20        | 20         | 73         | 45         | 47         | 92                                   | 16        | 32        | 32         | 129        | 15         | 13         | 26         | 13        | 11        | 8          | 135       | 3         | 17        | 47        | 29  | 20  | 20  |    |
| tetracycline_tet(10)                       | 68                               | 65         | 64         | 83         | 17        | 39        | 51         | 128        | 29         | 16         | 21         | 11        | 12                                  | 20         | 162        | 6          | 14         | 21         | 13        | 35        | 26         | 68         | 65         | 64         | 83                                   | 17        | 39        | 51         | 128        | 29         | 16         | 21         | 11        | 12        | 20         | 162       | 6         | 14        | 21        | 13  | 35  | 26  |    |
| beta_lactam_MOX-1                          | 61                               | 58         | 30         | 47         | 6         | 11        | 8          | 105        | 17         | 5          | 14         | 0         | 2                                   | 2          | 105        | 7          |            |            |           |           |            |            |            |            |                                      |           |           |            |            |            |            |            |           |           |            |           |           |           |           |     |     |     |    |

|                                                  |    |    |    |    |    |    |    |    |    |    |    |    |    |    |    |   |    |    |    |    |    |
|--------------------------------------------------|----|----|----|----|----|----|----|----|----|----|----|----|----|----|----|---|----|----|----|----|----|
| aminoglycoside__ANT(6)-Ib                        | 16 | 19 | 25 | 17 | 5  | 14 | 13 | 24 | 1  | 3  | 9  | 3  | 1  | 1  | 23 | 1 | 1  | 0  | 2  | 1  | 1  |
| beta_lactam__OXA-427                             | 23 | 32 | 25 | 19 | 14 | 31 | 34 | 24 | 15 | 6  | 8  | 7  | 10 | 9  | 38 | 7 | 4  | 31 | 11 | 17 | 27 |
| aminoglycoside__aadA22                           | 14 | 6  | 7  | 16 | 4  | 4  | 3  | 23 | 4  | 3  | 7  | 3  | 2  | 1  | 11 | 1 | 3  | 5  | 2  | 2  | 2  |
| beta_lactam__ClnA5                               | 27 | 7  | 24 | 28 | 16 | 18 | 16 | 23 | 5  | 6  | 12 | 8  | 0  | 3  | 40 | 1 | 3  | 1  | 20 | 4  | 3  |
| beta_lactam__OXA-86                              | 8  | 4  | 3  | 3  | 1  | 6  | 11 | 23 | 10 | 23 | 13 | 10 | 9  | 17 | 46 | 3 | 12 | 34 | 11 | 49 | 27 |
| aminoglycoside__APH(3)-Ia                        | 10 | 15 | 10 | 22 | 8  | 19 | 16 | 21 | 5  | 2  | 3  | 10 | 1  | 9  | 24 | 2 | 5  | 4  | 7  | 8  | 8  |
| beta_lactam__ClnA3                               | 12 | 10 | 16 | 28 | 12 | 10 | 22 | 21 | 1  | 2  | 10 | 7  | 0  | 1  | 16 | 0 | 1  | 7  | 10 | 1  | 1  |
| aminoglycoside__AAC(6)-Ib7                       | 8  | 15 | 8  | 15 | 4  | 7  | 6  | 20 | 5  | 5  | 4  | 2  | 3  | 1  | 24 | 3 | 3  | 5  | 6  | 9  | 2  |
| beta_lactam__GES-10                              | 8  | 5  | 7  | 13 | 3  | 3  | 2  | 20 | 1  | 3  | 3  | 0  | 0  | 3  | 15 | 1 | 2  | 9  | 2  | 0  | 1  |
| tetracycline__tet(40)                            | 25 | 20 | 24 | 28 | 24 | 15 | 31 | 20 | 1  | 4  | 8  | 7  | 1  | 5  | 19 | 0 | 2  | 4  | 9  | 2  | 1  |
| multidrug__MexE                                  | 14 | 14 | 13 | 18 | 4  | 7  | 3  | 20 | 6  | 6  | 9  | 5  | 3  | 5  | 21 | 1 | 5  | 13 | 11 | 6  | 5  |
| aminoglycoside__aadA25                           | 6  | 5  | 12 | 11 | 2  | 2  | 0  | 19 | 0  | 3  | 4  | 0  | 1  | 0  | 11 | 2 | 1  | 2  | 1  | 1  | 1  |
| chloramphenicol__Campylobacter coli chloramph    | 10 | 9  | 21 | 18 | 2  | 8  | 8  | 19 | 2  | 1  | 4  | 2  | 0  | 0  | 18 | 1 | 0  | 4  | 5  | 0  | 2  |
| beta_lactam__Klebsiella pneumoniae OmpK37        | 21 | 15 | 22 | 26 | 13 | 14 | 10 | 15 | 7  | 11 | 10 | 6  | 8  | 5  | 26 | 2 | 2  | 13 | 20 | 11 | 11 |
| macrolide-incosamide-streptogramin__lin(C)       | 37 | 15 | 12 | 24 | 17 | 13 | 20 | 18 | 1  | 3  | 16 | 10 | 2  | 10 | 22 | 1 | 1  | 7  | 22 | 2  | 3  |
| macrolide-incosamide-streptogramin__lca(B)       | 22 | 11 | 20 | 23 | 7  | 6  | 12 | 18 | 1  | 1  | 10 | 6  | 1  | 2  | 15 | 0 | 0  | 4  | 8  | 1  | 0  |
| other_peptide_antibiotics__AmT                   | 19 | 9  | 22 | 11 | 8  | 23 | 20 | 18 | 5  | 8  | 13 | 11 | 12 | 11 | 17 | 2 | 4  | 11 | 10 | 15 | 17 |
| tetracycline__tet(OW)                            | 16 | 9  | 21 | 21 | 10 | 11 | 14 | 18 | 1  | 1  | 8  | 8  | 2  | 2  | 10 | 0 | 0  | 5  | 6  | 0  | 1  |
| beta_lactam__CepS                                | 7  | 13 | 6  | 15 | 4  | 8  | 13 | 17 | 6  | 2  | 1  | 2  | 1  | 3  | 24 | 1 | 1  | 6  | 7  | 4  | 4  |
| beta_lactam__CTX-M-3                             | 10 | 7  | 6  | 3  | 7  | 8  | 8  | 17 | 2  | 6  | 2  | 5  | 5  | 5  | 4  | 0 | 2  | 17 | 5  | 5  | 5  |
| quinolone__OtrS5                                 | 8  | 6  | 4  | 12 | 5  | 12 | 15 | 17 | 3  | 6  | 7  | 4  | 7  | 7  | 23 | 2 | 2  | 12 | 4  | 9  | 7  |
| aminoglycoside__AAC(6)-Ib10                      | 10 | 8  | 6  | 15 | 6  | 2  | 4  | 16 | 3  | 3  | 5  | 2  | 3  | 1  | 13 | 0 | 4  | 12 | 7  | 5  | 2  |
| multidrug__smeE                                  | 14 | 13 | 8  | 15 | 2  | 7  | 9  | 15 | 5  | 4  | 10 | 4  | 7  | 8  | 19 | 1 | 5  | 13 | 6  | 9  | 12 |
| aminoglycoside__AAC(6)-Ib-Hangzhou               | 7  | 5  | 2  | 6  | 3  | 1  | 3  | 15 | 6  | 0  | 2  | 2  | 3  | 5  | 20 | 0 | 4  | 5  | 4  | 9  | 2  |
| aminoglycoside__AAC(6)-Ilc                       | 8  | 8  | 4  | 12 | 2  | 7  | 4  | 15 | 3  | 1  | 1  | 5  | 1  | 3  | 11 | 4 | 2  | 17 | 3  | 20 | 1  |
| beta_lactam__ClnA6                               | 24 | 26 | 23 | 44 | 40 | 33 | 63 | 15 | 7  | 3  | 13 | 21 | 4  | 18 | 21 | 0 | 0  | 5  | 49 | 1  | 8  |
| beta_lactam__OXA-34                              | 4  | 4  | 3  | 3  | 0  | 4  | 5  | 15 | 3  | 0  | 4  | 0  | 0  | 2  | 17 | 0 | 0  | 5  | 3  | 6  | 1  |
| multidrug__MuxB                                  | 11 | 9  | 10 | 13 | 7  | 14 | 14 | 15 | 12 | 11 | 26 | 13 | 13 | 10 | 20 | 2 | 18 | 51 | 24 | 26 | 29 |
| aminoglycoside__AAC(6)-Ib8                       | 13 | 5  | 6  | 14 | 4  | 7  | 6  | 14 | 0  | 2  | 9  | 3  | 4  | 1  | 13 | 2 | 1  | 6  | 5  | 4  | 2  |
| beta_lactam__OXA-420                             | 8  | 2  | 3  | 4  | 0  | 4  | 10 | 14 | 4  | 8  | 12 | 6  | 12 | 13 | 27 | 1 | 4  | 21 | 12 | 35 | 29 |
| multidrug__mdtE                                  | 10 | 13 | 15 | 14 | 5  | 8  | 9  | 14 | 3  | 4  | 11 | 5  | 3  | 4  | 16 | 1 | 2  | 10 | 10 | 4  | 4  |
| trimethoprim__dfrA3                              | 5  | 10 | 3  | 8  | 4  | 6  | 2  | 14 | 3  | 1  | 5  | 1  | 0  | 0  | 23 | 1 | 1  | 0  | 1  | 1  | 4  |
| macrolide-incosamide-streptogramin__linu(H)      | 0  | 1  | 6  | 10 | 1  | 8  | 4  | 13 | 1  | 0  | 1  | 1  | 0  | 0  | 17 | 0 | 1  | 4  | 2  | 15 | 1  |
| tetracycline__tbtE                               | 12 | 6  | 15 | 8  | 3  | 14 | 16 | 13 | 8  | 9  | 2  | 6  | 1  | 4  | 18 | 0 | 1  | 7  | 7  | 3  | 11 |
| multidrug__MexC                                  | 10 | 5  | 3  | 8  | 3  | 7  | 7  | 13 | 4  | 3  | 4  | 2  | 0  | 1  | 12 | 2 | 2  | 13 | 3  | 11 | 4  |
| aminoglycoside__AAC(6)-Ib                        | 6  | 7  | 3  | 12 | 2  | 4  | 4  | 12 | 4  | 3  | 7  | 1  | 0  | 2  | 13 | 1 | 2  | 13 | 9  | 7  | 7  |
| aminoglycoside__ANT(3)-II-AAC(6)-IId fusion pro  | 3  | 4  | 5  | 13 | 1  | 1  | 2  | 12 | 1  | 0  | 3  | 0  | 2  | 2  | 16 | 0 | 2  | 1  | 1  | 0  | 2  |
| chloramphenicol__catB8                           | 4  | 2  | 4  | 4  | 0  | 5  | 13 | 12 | 1  | 1  | 6  | 2  | 2  | 0  | 7  | 1 | 1  | 20 | 20 | 4  | 4  |
| macrolide-incosamide-streptogramin__erm(35)      | 13 | 5  | 6  | 11 | 0  | 3  | 5  | 12 | 4  | 0  | 4  | 1  | 1  | 1  | 12 | 0 | 1  | 0  | 0  | 5  | 1  |
| aminoglycoside__AAC(6)-Ia                        | 8  | 17 | 20 | 16 | 17 | 43 | 58 | 11 | 3  | 1  | 8  | 5  | 2  | 2  | 24 | 0 | 4  | 2  | 6  | 13 | 31 |
| aminoglycoside__aadA17                           | 2  | 4  | 4  | 6  | 1  | 2  | 5  | 11 | 0  | 0  | 0  | 0  | 0  | 1  | 8  | 0 | 0  | 4  | 1  | 1  | 0  |
| beta_lactam__Escherichia coli ampC               | 8  | 5  | 9  | 6  | 3  | 4  | 7  | 11 | 2  | 1  | 4  | 9  | 1  | 3  | 8  | 0 | 2  | 1  | 7  | 1  | 0  |
| beta_lactam__GES-3                               | 12 | 6  | 7  | 5  | 2  | 3  | 1  | 11 | 2  | 1  | 2  | 1  | 2  | 1  | 8  | 1 | 0  | 7  | 1  | 4  | 2  |
| beta_lactam__MOX-2                               | 6  | 11 | 3  | 8  | 4  | 2  | 5  | 11 | 5  | 1  | 0  | 3  | 5  | 12 | 1  | 3 | 4  | 4  | 1  | 1  | 4  |
| beta_lactam__MOX-7                               | 6  | 3  | 5  | 0  | 0  | 8  | 16 | 11 | 4  | 0  | 1  | 2  | 0  | 7  | 13 | 2 | 1  | 1  | 2  | 1  | 5  |
| macrolide-incosamide-streptogramin__linu(B)      | 19 | 4  | 14 | 5  | 1  | 2  | 4  | 11 | 1  | 0  | 2  | 1  | 0  | 2  | 5  | 1 | 0  | 0  | 0  | 1  | 0  |
| polymyxin__mcr-9.1                               | 6  | 6  | 6  | 1  | 1  | 1  | 2  | 11 | 1  | 1  | 2  | 0  | 1  | 2  | 5  | 1 | 1  | 7  | 4  | 1  | 1  |
| multidrug__MexD                                  | 9  | 8  | 8  | 10 | 2  | 7  | 4  | 10 | 9  | 7  | 18 | 9  | 6  | 2  | 15 | 3 | 9  | 37 | 13 | 23 | 11 |
| aminoglycoside__AAC(6)-Ib-Suzhou                 | 5  | 3  | 4  | 5  | 2  | 3  | 1  | 10 | 2  | 0  | 3  | 2  | 0  | 0  | 3  | 0 | 2  | 6  | 2  | 3  | 4  |
| aminoglycoside__APH(3)-Ila                       | 17 | 12 | 16 | 15 | 9  | 13 | 11 | 10 | 3  | 0  | 6  | 3  | 2  | 2  | 9  | 1 | 0  | 2  | 3  | 3  | 1  |
| beta_lactam__IMP-42                              | 3  | 7  | 8  | 9  | 2  | 4  | 6  | 10 | 3  | 4  | 13 | 6  | 3  | 3  | 4  | 1 | 9  | 7  | 15 | 9  | 7  |
| beta_lactam__OXA-724                             | 9  | 11 | 2  | 17 | 7  | 10 | 12 | 10 | 8  | 0  | 6  | 3  | 1  | 5  | 12 | 0 | 2  | 6  | 3  | 3  | 4  |
| multidrug__scrE                                  | 11 | 4  | 11 | 10 | 3  | 4  | 4  | 10 | 3  | 6  | 7  | 4  | 1  | 3  | 11 | 2 | 2  | 7  | 4  | 5  | 2  |
| multidrug__mtrD                                  | 6  | 9  | 10 | 13 | 5  | 6  | 3  | 10 | 4  | 4  | 6  | 3  | 0  | 2  | 10 | 1 | 1  | 2  | 3  | 2  | 1  |
| pleuromutilin__lamulin__TaeA                     | 17 | 3  | 16 | 12 | 10 | 11 | 8  | 10 | 2  | 0  | 4  | 4  | 1  | 3  | 12 | 1 | 0  | 1  | 0  | 1  | 0  |
| tetracycline__tet(WINW)                          | 3  | 6  | 6  | 15 | 2  | 11 | 5  | 10 | 0  | 1  | 1  | 3  | 2  | 0  | 13 | 0 | 0  | 3  | 4  | 2  | 1  |
| trimethoprim__dfrA27                             | 5  | 2  | 2  | 5  | 1  | 4  | 4  | 10 | 1  | 2  | 3  | 2  | 2  | 3  | 4  | 1 | 1  | 2  | 0  | 1  | 0  |
| multidrug__ogxB                                  | 8  | 4  | 8  | 6  | 8  | 11 | 5  | 10 | 5  | 4  | 7  | 6  | 5  | 7  | 9  | 1 | 2  | 6  | 8  | 10 | 6  |
| beta_lactam__GES-22                              | 4  | 0  | 0  | 4  | 0  | 1  | 0  | 9  | 0  | 1  | 1  | 1  | 0  | 0  | 5  | 0 | 0  | 0  | 2  | 2  | 1  |
| beta_lactam__TEM-117                             | 4  | 5  | 4  | 2  | 5  | 5  | 4  | 9  | 1  | 5  | 3  | 3  | 3  | 2  | 11 | 0 | 1  | 4  | 3  | 2  | 2  |
| florfenicol__floR                                | 8  | 8  | 8  | 13 | 4  | 7  | 8  | 9  | 9  | 5  | 8  | 7  | 4  | 3  | 15 | 0 | 2  | 18 | 9  | 5  | 4  |
| macrolide-incosamide-streptogramin__lca(E)       | 17 | 4  | 16 | 12 | 3  | 3  | 6  | 9  | 3  | 1  | 4  | 0  | 0  | 0  | 15 | 0 | 0  | 2  | 0  | 0  | 2  |
| beta_lactam__smrB                                | 7  | 7  | 5  | 4  | 2  | 3  | 4  | 9  | 2  | 3  | 5  | 3  | 2  | 2  | 8  | 1 | 0  | 3  | 6  | 4  | 4  |
| aminoglycoside__aadA21                           | 5  | 5  | 4  | 4  | 2  | 3  | 2  | 8  | 1  | 1  | 0  | 2  | 1  | 1  | 10 | 2 | 0  | 0  | 3  | 1  | 0  |
| beta_lactam__CMY-59                              | 4  | 5  | 7  | 6  | 0  | 0  | 1  | 8  | 1  | 1  | 1  | 0  | 1  | 1  | 1  | 1 | 1  | 0  | 1  | 0  | 0  |
| beta_lactam__OXA-275                             | 6  | 14 | 7  | 33 | 2  | 6  | 4  | 8  | 10 | 10 | 9  | 2  | 2  | 0  | 30 | 6 | 2  | 13 | 8  | 11 | 3  |
| beta_lactam__OXA-392                             | 4  | 1  | 0  | 2  | 0  | 1  | 0  | 8  | 0  | 0  | 1  | 0  | 0  | 0  | 7  | 0 | 0  | 0  | 0  | 0  | 0  |
| beta_lactam__OXA-397                             | 1  | 2  | 0  | 1  | 0  | 0  | 0  | 8  | 1  | 3  | 3  | 2  | 2  | 6  | 9  | 0 | 2  | 10 | 4  | 11 | 12 |
| mupirocin__mupB                                  | 7  | 1  | 5  | 4  | 0  | 2  | 0  | 8  | 0  | 1  | 1  | 1  | 0  | 0  | 4  | 0 | 0  | 1  | 0  | 0  | 1  |
| tetracycline__tetB(P)                            | 8  | 7  | 6  | 6  | 1  | 5  | 6  | 8  | 4  | 3  | 3  | 2  | 3  | 1  | 13 | 1 | 5  | 3  | 1  | 1  | 2  |
| aminoglycoside__aad(6)                           | 8  | 4  | 10 | 8  | 3  | 3  | 4  | 7  | 0  | 3  | 1  | 4  | 0  | 1  | 9  | 0 | 0  | 0  | 1  | 0  | 2  |
| multidrug__aadA24                                | 4  | 3  | 2  | 3  | 2  | 1  | 1  | 7  | 1  | 1  | 0  | 0  | 3  | 0  | 5  | 0 | 0  | 2  | 1  | 2  | 1  |
| beta_lactam__ClnA4                               | 7  | 10 | 13 | 9  | 10 | 3  | 4  | 13 | 5  | 7  | 4  | 0  | 2  | 12 | 8  | 2 | 2  | 3  | 8  | 3  | 0  |
| beta_lactam__OXA-118                             | 10 | 6  | 2  | 1  | 0  | 2  | 1  | 7  | 2  | 1  | 2  | 0  | 0  | 0  | 9  | 0 | 0  | 2  | 1  | 2  | 1  |
| beta_lactam__OXA-296                             | 3  | 17 | 3  | 23 | 7  | 4  | 2  | 7  | 3  | 1  | 6  | 1  | 0  | 0  | 13 | 1 | 0  | 7  | 4  | 0  | 1  |
| beta_lactam__OXA-324                             | 1  | 7  | 4  | 20 | 1  | 2  | 2  | 7  | 5  | 0  | 5  | 0  | 1  | 0  | 16 | 0 | 2  | 2  | 0  | 2  | 1  |
| chloramphenicol__Vibrio anguillarum chlorampheni | 5  | 0  | 5  | 0  | 3  | 4  | 5  | 7  | 1  | 1  | 1  | 2  | 1  | 0  | 5  | 0 | 0  | 1  | 1  | 0  | 2  |
| multidrug__abeS                                  | 3  | 5  | 0  | 9  | 3  | 2  | 0  | 7  | 4  | 2  | 1  | 0  | 0  | 0  | 10 | 0 | 1  | 1  | 0  | 1  | 1  |
| multidrug__MexF                                  | 6  | 6  | 7  | 8  | 5  | 3  | 3  | 7  | 19 | 13 | 26 | 16 | 9  | 6  | 14 | 2 | 16 | 24 | 22 | 14 | 11 |
| quinolone__OtrA1                                 | 3  | 5  | 2  | 2  | 2  | 3  | 1  | 7  | 0  | 1  | 2  | 0  | 0  | 0  | 3  | 0 | 2  | 2  | 0  | 1  | 0  |
| tetracycline__tetA(P)                            | 8  | 2  | 6  | 5  | 0  | 5  | 5  | 7  | 2  | 1  | 4  | 3  | 3  | 2  | 14 | 0 | 0  | 3  | 2  | 1  | 1  |
| vancomycin__vanG                                 | 4  | 4  | 8  | 6  | 1  | 7  | 6  | 7  | 0  | 0  | 0  | 1  | 0  | 0  | 4  | 0 | 1  |    |    |    |    |

|                                                   |   |   |    |    |   |   |    |   |   |    |    |    |    |    |    |   |    |    |    |    |    |
|---------------------------------------------------|---|---|----|----|---|---|----|---|---|----|----|----|----|----|----|---|----|----|----|----|----|
| rifamycin_arr-3                                   | 2 | 2 | 1  | 2  | 1 | 2 | 1  | 4 | 0 | 0  | 3  | 1  | 1  | 0  | 2  | 0 | 0  | 0  | 0  | 0  | 1  |
| tetracycline_tetX3                                | 2 | 3 | 3  | 3  | 0 | 3 | 6  | 4 | 1 | 0  | 0  | 3  | 1  | 2  | 5  | 0 | 0  | 1  | 2  | 1  | 3  |
| tetracycline_tetX6                                | 2 | 1 | 2  | 1  | 0 | 1 | 1  | 4 | 1 | 0  | 0  | 0  | 0  | 0  | 1  | 0 | 0  | 0  | 1  | 3  | 0  |
| trimethoprim_dfrI                                 | 4 | 3 | 5  | 2  | 5 | 3 | 4  | 4 | 1 | 1  | 2  | 4  | 2  | 0  | 4  | 0 | 0  | 2  | 4  | 0  | 0  |
| multidrug_cfb                                     | 3 | 3 | 3  | 1  | 5 | 3 | 1  | 4 | 0 | 1  | 2  | 2  | 0  | 1  | 1  | 0 | 1  | 0  | 2  | 1  | 0  |
| aminoglycoside__AAC(3)-IId                        | 3 | 2 | 1  | 3  | 0 | 0 | 1  | 3 | 1 | 1  | 2  | 1  | 0  | 1  | 8  | 1 | 2  | 3  | 2  | 1  | 0  |
| aminoglycoside__AAC(6)-IId3                       | 1 | 0 | 0  | 0  | 0 | 0 | 0  | 3 | 0 | 0  | 0  | 0  | 0  | 0  | 2  | 0 | 1  | 0  | 0  | 1  |    |
| aminoglycoside__aadA15                            | 1 | 1 | 0  | 0  | 0 | 1 | 0  | 3 | 0 | 0  | 1  | 0  | 0  | 0  | 3  | 0 | 0  | 0  | 0  | 0  |    |
| aminoglycoside__armA                              | 1 | 0 | 0  | 0  | 1 | 1 | 0  | 3 | 1 | 0  | 1  | 0  | 0  | 0  | 2  | 0 | 0  | 2  | 0  | 0  |    |
| beta_lactam__ACI-1                                | 4 | 2 | 5  | 6  | 7 | 3 | 9  | 3 | 0 | 0  | 3  | 5  | 1  | 1  | 4  | 0 | 0  | 1  | 7  | 0  | 0  |
| beta_lactam__CTX-M-55                             | 1 | 2 | 1  | 3  | 2 | 1 | 3  | 3 | 0 | 1  | 1  | 0  | 2  | 2  | 3  | 0 | 0  | 3  | 2  | 1  | 1  |
| beta_lactam__GES-12                               | 3 | 3 | 2  | 6  | 0 | 1 | 1  | 3 | 1 | 0  | 2  | 1  | 0  | 0  | 8  | 0 | 1  | 1  | 0  | 2  | 1  |
| beta_lactam__GES-8                                | 0 | 6 | 1  | 1  | 2 | 0 | 0  | 3 | 1 | 0  | 0  | 0  | 0  | 0  | 1  | 0 | 1  | 1  | 0  | 0  | 0  |
| beta_lactam__IMP-10                               | 1 | 1 | 1  | 1  | 2 | 0 | 1  | 3 | 2 | 0  | 0  | 1  | 0  | 1  | 1  | 0 | 2  | 2  | 4  | 1  | 0  |
| beta_lactam__MOX-4                                | 5 | 5 | 1  | 4  | 7 | 5 | 4  | 3 | 4 | 0  | 3  | 7  | 5  | 2  | 4  | 1 | 0  | 7  | 4  | 4  | 11 |
| beta_lactam__OXA-139                              | 2 | 0 | 4  | 9  | 0 | 7 | 8  | 3 | 1 | 31 | 42 | 28 | 35 | 46 | 6  | 0 | 40 | 63 | 73 | 34 | 60 |
| beta_lactam__OXA-147                              | 1 | 1 | 2  | 1  | 2 | 2 | 2  | 3 | 0 | 0  | 0  | 0  | 1  | 0  | 1  | 0 | 2  | 0  | 0  | 0  | 0  |
| beta_lactam__OXA-300                              | 0 | 0 | 2  | 1  | 0 | 0 | 0  | 3 | 5 | 6  | 0  | 0  | 0  | 1  | 7  | 0 | 2  | 3  | 0  | 1  | 0  |
| beta_lactam__OXA-355                              | 0 | 0 | 0  | 0  | 0 | 0 | 1  | 3 | 5 | 1  | 4  | 0  | 0  | 0  | 4  | 1 | 1  | 3  | 1  | 1  | 1  |
| beta_lactam__VEB-7                                | 2 | 1 | 1  | 1  | 1 | 1 | 1  | 3 | 0 | 0  | 0  | 0  | 1  | 0  | 0  | 0 | 0  | 0  | 0  | 1  | 0  |
| beta_lactam__VIM-2                                | 4 | 2 | 3  | 10 | 1 | 3 | 7  | 3 | 1 | 5  | 2  | 1  | 1  | 1  | 13 | 0 | 0  | 0  | 0  | 0  | 1  |
| chloramphenicol__catII from Escherichia coli K-12 | 5 | 3 | 3  | 1  | 1 | 2 | 2  | 3 | 5 | 1  | 3  | 1  | 2  | 13 | 5  | 1 | 2  | 14 | 3  | 15 | 36 |
| chloramphenicol__cmiA4                            | 1 | 2 | 1  | 0  | 0 | 0 | 2  | 3 | 3 | 4  | 0  | 2  | 1  | 1  | 7  | 0 | 0  | 1  | 0  | 3  | 3  |
| macrolide-lincosamide-streptogramin__Erm(S2)      | 7 | 3 | 8  | 3  | 2 | 4 | 2  | 3 | 1 | 0  | 0  | 1  | 0  | 0  | 12 | 0 | 0  | 1  | 1  | 0  | 1  |
| macrolide-lincosamide-streptogramin__mef(C)       | 3 | 3 | 13 | 6  | 0 | 6 | 1  | 3 | 0 | 1  | 1  | 3  | 1  | 2  | 11 | 0 | 1  | 1  | 1  | 5  | 3  |
| multidrug_Klebsiella pneumoniae acrA              | 4 | 3 | 2  | 4  | 5 | 5 | 3  | 3 | 1 | 3  | 4  | 3  | 1  | 4  | 4  | 1 | 1  | 3  | 3  | 3  | 0  |
| multidrug_Other_major_facilitator_superfamily_1   | 5 | 5 | 8  | 6  | 4 | 3 | 12 | 3 | 1 | 3  | 2  | 5  | 3  | 1  | 7  | 0 | 0  | 4  | 10 | 4  | 1  |
| polymyxin_mcr-3.7                                 | 1 | 1 | 0  | 1  | 0 | 2 | 0  | 3 | 0 | 0  | 2  | 0  | 0  | 0  | 2  | 0 | 0  | 0  | 0  | 0  | 0  |
| quinolone__QnrVC1                                 | 0 | 1 | 0  | 2  | 0 | 0 | 1  | 3 | 1 | 0  | 0  | 0  | 0  | 0  | 0  | 0 | 0  | 0  | 0  | 1  | 0  |
| trimethoprim_dfrA1                                | 3 | 1 | 2  | 2  | 0 | 3 | 0  | 3 | 0 | 2  | 3  | 1  | 1  | 1  | 2  | 0 | 1  | 1  | 2  | 3  | 0  |
| multidrug_mdsB                                    | 2 | 5 | 4  | 4  | 2 | 3 | 2  | 3 | 1 | 4  | 2  | 2  | 2  | 5  | 7  | 1 | 1  | 7  | 5  | 7  | 4  |
| aminoglycoside__aadA10                            | 4 | 1 | 1  | 4  | 2 | 0 | 0  | 2 | 2 | 2  | 2  | 1  | 3  | 1  | 3  | 0 | 0  | 3  | 1  | 0  | 1  |
| aminoglycoside__APH(2'')-II                       | 3 | 1 | 2  | 2  | 1 | 1 | 2  | 2 | 1 | 0  | 1  | 0  | 0  | 0  | 1  | 0 | 0  | 0  | 1  | 1  | 1  |
| lactacin__lactA                                   | 2 | 5 | 4  | 3  | 1 | 2 | 1  | 2 | 2 | 0  | 1  | 3  | 1  | 1  | 1  | 0 | 0  | 1  | 0  | 0  | 0  |
| beta_lactam__CFE-1                                | 4 | 6 | 2  | 4  | 1 | 1 | 1  | 2 | 0 | 1  | 1  | 1  | 1  | 1  | 4  | 1 | 0  | 1  | 3  | 1  | 1  |
| beta_lactam__CMY-34                               | 3 | 2 | 1  | 2  | 0 | 0 | 1  | 2 | 0 | 1  | 0  | 0  | 1  | 0  | 3  | 0 | 0  | 0  | 0  | 0  | 0  |
| beta_lactam__CMY-45                               | 1 | 0 | 2  | 0  | 0 | 1 | 0  | 2 | 0 | 1  | 2  | 0  | 0  | 0  | 0  | 0 | 0  | 0  | 0  | 0  | 0  |
| beta_lactam__CMY-65                               | 0 | 0 | 0  | 0  | 0 | 0 | 0  | 2 | 0 | 0  | 0  | 1  | 0  | 0  | 0  | 0 | 0  | 0  | 0  | 0  | 0  |
| beta_lactam__cphA3                                | 1 | 0 | 0  | 0  | 0 | 0 | 0  | 2 | 0 | 0  | 0  | 0  | 1  | 0  | 1  | 0 | 0  | 0  | 0  | 0  | 0  |
| beta_lactam__cphA7                                | 2 | 3 | 2  | 12 | 2 | 3 | 5  | 2 | 3 | 0  | 3  | 0  | 0  | 0  | 9  | 2 | 0  | 2  | 1  | 2  | 0  |
| beta_lactam__CTX-M-108                            | 1 | 1 | 2  | 0  | 0 | 0 | 0  | 2 | 0 | 2  | 3  | 0  | 2  | 1  | 0  | 1 | 0  | 1  | 0  | 3  | 1  |
| beta_lactam__CTX-M-123                            | 3 | 2 | 2  | 1  | 1 | 1 | 1  | 2 | 0 | 0  | 2  | 4  | 3  | 0  | 1  | 1 | 1  | 2  | 4  | 0  | 2  |
| beta_lactam__CTX-M-137                            | 0 | 0 | 3  | 0  | 1 | 0 | 0  | 2 | 0 | 0  | 0  | 1  | 0  | 0  | 0  | 1 | 0  | 0  | 0  | 3  | 3  |
| beta_lactam__FOX-5                                | 0 | 0 | 2  | 0  | 0 | 2 | 2  | 2 | 0 | 0  | 0  | 0  | 0  | 0  | 1  | 0 | 0  | 0  | 0  | 0  | 0  |
| beta_lactam__GES-26                               | 3 | 0 | 1  | 3  | 1 | 0 | 1  | 2 | 0 | 0  | 1  | 0  | 0  | 0  | 2  | 0 | 0  | 0  | 0  | 1  | 0  |
| beta_lactam__GES-9                                | 1 | 3 | 1  | 2  | 0 | 0 | 0  | 2 | 0 | 1  | 0  | 0  | 0  | 0  | 3  | 0 | 0  | 2  | 1  | 0  | 0  |
| beta_lactam__IMP-40                               | 0 | 2 | 1  | 0  | 1 | 0 | 5  | 2 | 0 | 0  | 1  | 0  | 0  | 0  | 3  | 1 | 0  | 2  | 0  | 1  | 2  |
| beta_lactam__IMP-44                               | 0 | 0 | 0  | 0  | 0 | 0 | 0  | 2 | 1 | 0  | 0  | 1  | 0  | 0  | 1  | 0 | 1  | 0  | 1  | 1  | 0  |
| beta_lactam__Laribacter hongkongensis ampC be     | 5 | 3 | 3  | 2  | 0 | 4 | 1  | 2 | 1 | 2  | 1  | 1  | 0  | 2  | 9  | 0 | 1  | 12 | 0  | 2  | 2  |
| beta_lactam__MOX-9                                | 0 | 2 | 2  | 1  | 0 | 0 | 2  | 2 | 0 | 1  | 0  | 0  | 0  | 1  | 3  | 0 | 0  | 5  | 1  | 2  | 1  |
| beta_lactam__MYO-1                                | 0 | 1 | 2  | 0  | 2 | 0 | 0  | 2 | 0 | 1  | 0  | 0  | 0  | 1  | 2  | 0 | 0  | 1  | 1  | 0  | 0  |
| beta_lactam__ORN-5                                | 1 | 1 | 0  | 1  | 0 | 0 | 0  | 2 | 1 | 0  | 0  | 0  | 1  | 0  | 0  | 0 | 0  | 0  | 1  | 0  | 0  |
| beta_lactam__OXA-15                               | 0 | 0 | 0  | 0  | 0 | 0 | 0  | 2 | 0 | 0  | 0  | 0  | 0  | 0  | 0  | 0 | 1  | 1  | 0  | 0  | 0  |
| beta_lactam__OXA-205                              | 6 | 0 | 2  | 2  | 0 | 2 | 2  | 2 | 0 | 1  | 0  | 0  | 0  | 0  | 2  | 2 | 2  | 0  | 0  | 3  | 0  |
| beta_lactam__OXA-207                              | 0 | 0 | 1  | 1  | 0 | 0 | 2  | 2 | 0 | 11 | 12 | 7  | 14 | 11 | 0  | 0 | 15 | 22 | 22 | 12 | 19 |
| beta_lactam__OXA-301                              | 1 | 4 | 0  | 4  | 1 | 1 | 1  | 2 | 1 | 2  | 3  | 1  | 0  | 0  | 2  | 1 | 0  | 4  | 1  | 1  | 0  |
| beta_lactam__OXA-320                              | 0 | 5 | 0  | 1  | 0 | 0 | 1  | 2 | 0 | 0  | 0  | 0  | 0  | 0  | 2  | 0 | 0  | 0  | 0  | 0  | 0  |
| beta_lactam__OXA-36                               | 1 | 4 | 2  | 2  | 2 | 1 | 1  | 2 | 0 | 0  | 1  | 0  | 0  | 0  | 3  | 0 | 2  | 0  | 1  | 1  | 0  |
| beta_lactam__OXA-37                               | 3 | 1 | 4  | 0  | 0 | 0 | 0  | 2 | 0 | 0  | 2  | 0  | 0  | 0  | 0  | 0 | 0  | 0  | 0  | 0  | 0  |
| beta_lactam__SHV-22                               | 1 | 1 | 1  | 0  | 0 | 0 | 1  | 2 | 0 | 0  | 0  | 0  | 0  | 0  | 0  | 0 | 0  | 2  | 0  | 1  | 0  |
| beta_lactam__SHV-4                                | 1 | 0 | 0  | 1  | 0 | 1 | 2  | 2 | 0 | 1  | 0  | 0  | 0  | 2  | 0  | 0 | 0  | 0  | 0  | 1  | 0  |
| beta_lactam__SHV-53                               | 3 | 0 | 2  | 3  | 1 | 0 | 1  | 2 | 1 | 1  | 2  | 1  | 1  | 0  | 3  | 0 | 0  | 5  | 0  | 1  | 0  |
| beta_lactam__TMB-1                                | 2 | 3 | 1  | 0  | 0 | 2 | 2  | 2 | 1 | 4  | 1  | 3  | 5  | 3  | 2  | 3 | 7  | 5  | 15 | 23 | 25 |
| beta_lactam__VEB-4                                | 0 | 2 | 0  | 1  | 1 | 0 | 0  | 2 | 0 | 0  | 1  | 0  | 0  | 0  | 0  | 1 | 0  | 0  | 0  | 0  | 0  |
| beta_lactam__VEB-9                                | 5 | 5 | 0  | 3  | 0 | 3 | 2  | 2 | 0 | 1  | 1  | 0  | 1  | 0  | 3  | 1 | 1  | 1  | 0  | 2  | 0  |
| beta_lactam__VIM-23                               | 0 | 0 | 2  | 1  | 1 | 1 | 1  | 2 | 0 | 1  | 0  | 0  | 0  | 0  | 0  | 0 | 0  | 0  | 0  | 0  | 0  |
| beta_lactam__VIM-26                               | 0 | 0 | 2  | 2  | 1 | 1 | 0  | 2 | 0 | 0  | 1  | 0  | 0  | 0  | 0  | 0 | 0  | 0  | 0  | 0  | 0  |
| beta_lactam__VIM-3                                | 0 | 0 | 0  | 0  | 0 | 0 | 1  | 2 | 0 | 0  | 0  | 0  | 0  | 0  | 0  | 0 | 0  | 0  | 0  | 0  | 0  |
| macrolide-lincosamide-streptogramin__erm(X)       | 2 | 4 | 4  | 6  | 4 | 4 | 5  | 2 | 0 | 0  | 6  | 2  | 2  | 1  | 6  | 0 | 2  | 2  | 0  | 0  | 0  |
| macrolide-lincosamide-streptogramin__hu(F)        | 1 | 0 | 1  | 0  | 0 | 1 | 1  | 2 | 0 | 0  | 0  | 0  | 0  | 0  | 1  | 1 | 0  | 0  | 0  | 0  | 0  |
| macrolide-lincosamide-streptogramin__msr(C)       | 0 | 1 | 2  | 2  | 4 | 1 | 0  | 2 | 0 | 1  | 0  | 3  | 0  | 0  | 2  | 0 | 0  | 0  | 3  | 0  | 0  |
| macrolide-lincosamide-streptogramin__RlmA(II)     | 0 | 1 | 1  | 0  | 0 | 0 | 0  | 2 | 0 | 0  | 2  | 0  | 0  | 0  | 0  | 0 | 0  | 0  | 0  | 0  | 0  |
| macrolide-lincosamide-streptogramin__vat(F)       | 4 | 4 | 1  | 1  | 0 | 3 | 2  | 2 | 7 | 2  | 1  | 1  | 1  | 0  | 3  | 2 | 1  | 2  | 2  | 0  | 0  |
| multidrug_mecA                                    | 3 | 1 | 3  | 2  | 2 | 4 | 2  | 2 | 0 | 1  | 2  | 1  | 1  | 0  | 3  | 1 | 0  | 1  | 2  | 1  | 0  |
| multidrug_mecF                                    | 8 | 0 | 0  | 3  | 1 | 4 | 0  | 2 | 0 | 1  | 1  | 1  | 2  | 1  | 0  | 0 | 0  | 0  | 1  | 2  | 0  |
| multidrug_pmrA                                    | 0 | 0 | 1  | 0  | 0 | 2 | 2  | 2 | 0 | 0  | 0  | 1  | 0  | 0  | 0  | 0 | 0  | 0  | 0  | 0  | 0  |
| polymyxin_mcr-3.1                                 | 2 | 1 | 1  | 1  | 0 | 1 | 0  | 2 | 0 | 0  | 0  | 0  | 0  | 0  | 2  | 0 | 0  | 0  | 0  | 1  | 0  |
| quinolone__QnrB54                                 | 1 | 1 | 2  | 1  | 0 | 0 | 1  | 2 | 0 | 0  | 0  | 0  | 0  | 0  | 1  | 0 | 0  | 0  | 0  | 0  | 0  |
| tetracycline_tet[35]                              | 2 | 1 | 1  | 2  | 0 | 2 | 0  | 2 | 0 | 0  | 1  | 1  | 0  | 2  | 3  | 0 | 2  | 0  | 0  | 2  | 0  |
| tetracycline_tet[Y]                               | 5 | 0 | 0  | 0  | 0 | 0 | 1  | 2 | 1 | 0  | 0  | 0  | 0  | 0  | 1  | 7 | 0  | 2  | 0  | 1  | 0  |
| tetracycline_tetX1                                | 3 | 1 | 2  | 0  | 1 | 0 | 3  | 2 | 0 | 1  | 1  | 1  | 1  | 0  | 2  | 0 | 0  | 0  | 4  | 0  | 0  |
| trimethoprim_dfrA15                               | 0 | 0 | 0  | 0  | 0 | 1 | 3  | 2 | 2 | 0  | 1  | 0  | 0  | 0  | 5  | 0 | 0  | 0  | 0  | 2  | 0  |
| trimethoprim_dfrE                                 | 2 | 1 | 0  | 0  | 0 | 0 | 0  | 2 | 0 | 0  | 0  | 0  | 0  | 0  | 0  | 0 | 0  | 0  | 0  | 0  | 0  |
| multidrug_coxB                                    | 2 | 1 | 4  | 2  | 1 | 2 | 2  | 2 | 1 | 2  | 3  | 2  | 2  | 2  | 5  | 1 | 3  | 4  | 4  | 5  | 2  |
| multidrug__Enterobacter cloacae acrA              | 1 | 0 | 1  | 1  | 0 | 1 | 2  | 2 | 0 | 1  | 1  |    |    |    |    |   |    |    |    |    |    |

|                                               |   |   |    |   |   |   |    |   |   |    |    |    |    |    |    |   |    |     |    |    |     |    |   |   |
|-----------------------------------------------|---|---|----|---|---|---|----|---|---|----|----|----|----|----|----|---|----|-----|----|----|-----|----|---|---|
| beta_lactam_OXA-12                            | 3 | 2 | 2  | 2 | 0 | 2 | 1  | 6 | 1 | 1  | 0  | 0  | 0  | 1  | 2  | 0 | 0  | 0   | 1  | 0  | 1   | 0  | 1 | 0 |
| beta_lactam_OXA-13                            | 2 | 0 | 0  | 2 | 0 | 0 | 0  | 0 | 0 | 1  | 0  | 0  | 0  | 1  | 0  | 1 | 2  | 0   | 0  | 0  | 0   | 0  | 0 | 0 |
| beta_lactam_OXA-14                            | 0 | 0 | 0  | 0 | 0 | 0 | 0  | 0 | 0 | 1  | 0  | 0  | 0  | 0  | 0  | 0 | 0  | 0   | 0  | 0  | 0   | 0  | 0 | 0 |
| beta_lactam_OXA-141                           | 2 | 0 | 0  | 0 | 1 | 0 | 1  | 1 | 1 | 1  | 0  | 0  | 0  | 0  | 0  | 0 | 0  | 0   | 0  | 0  | 0   | 2  | 0 | 0 |
| beta_lactam_OXA-20                            | 4 | 0 | 1  | 2 | 0 | 0 | 3  | 1 | 1 | 0  | 2  | 1  | 0  | 1  | 0  | 3 | 0  | 0   | 2  | 0  | 0   | 0  | 0 | 0 |
| beta_lactam_OXA-211                           | 1 | 2 | 0  | 2 | 1 | 2 | 2  | 2 | 1 | 2  | 2  | 0  | 1  | 3  | 1  | 4 | 0  | 2   | 5  | 0  | 2   | 1  | 0 | 0 |
| beta_lactam_OXA-224                           | 1 | 0 | 0  | 0 | 0 | 0 | 0  | 0 | 1 | 0  | 0  | 0  | 0  | 0  | 0  | 0 | 0  | 0   | 0  | 0  | 0   | 0  | 0 | 0 |
| beta_lactam_OXA-226                           | 1 | 3 | 1  | 1 | 3 | 1 | 2  | 1 | 2 | 1  | 0  | 1  | 1  | 1  | 0  | 6 | 0  | 3   | 2  | 1  | 1   | 0  | 0 | 0 |
| beta_lactam_OXA-229                           | 0 | 0 | 0  | 0 | 0 | 0 | 0  | 0 | 1 | 0  | 1  | 0  | 1  | 0  | 0  | 0 | 0  | 0   | 0  | 0  | 1   | 0  | 0 | 0 |
| beta_lactam_OXA-23                            | 2 | 0 | 0  | 0 | 1 | 0 | 1  | 0 | 1 | 2  | 4  | 2  | 1  | 0  | 0  | 2 | 0  | 1   | 1  | 0  | 2   | 0  | 0 | 0 |
| beta_lactam_OXA-230                           | 0 | 0 | 0  | 1 | 1 | 1 | 0  | 0 | 1 | 1  | 0  | 2  | 0  | 0  | 0  | 0 | 0  | 1   | 0  | 1  | 2   | 0  | 0 | 0 |
| beta_lactam_OXA-25                            | 0 | 0 | 1  | 1 | 1 | 0 | 0  | 0 | 1 | 1  | 4  | 14 | 13 | 17 | 18 | 1 | 0  | 6   | 12 | 21 | 9   | 14 | 0 | 0 |
| beta_lactam_OXA-257                           | 0 | 1 | 0  | 0 | 0 | 1 | 1  | 0 | 1 | 0  | 4  | 3  | 1  | 0  | 2  | 0 | 1  | 2   | 6  | 0  | 1   | 2  | 0 | 0 |
| beta_lactam_OXA-299                           | 0 | 0 | 1  | 1 | 0 | 8 | 19 | 1 | 0 | 4  | 5  | 8  | 25 | 36 | 1  | 0 | 2  | 45  | 17 | 81 | 115 | 0  | 0 | 0 |
| beta_lactam_OXA-31                            | 1 | 1 | 0  | 0 | 0 | 0 | 0  | 0 | 1 | 0  | 0  | 0  | 0  | 0  | 1  | 0 | 0  | 0   | 0  | 0  | 0   | 0  | 0 | 0 |
| beta_lactam_OXA-334                           | 0 | 1 | 0  | 3 | 2 | 0 | 2  | 1 | 0 | 0  | 0  | 0  | 1  | 1  | 0  | 0 | 2  | 1   | 2  | 2  | 2   | 0  | 0 | 0 |
| beta_lactam_OXA-356                           | 0 | 0 | 0  | 0 | 0 | 0 | 0  | 1 | 2 | 1  | 0  | 0  | 0  | 0  | 1  | 0 | 1  | 1   | 2  | 2  | 2   | 0  | 0 | 0 |
| beta_lactam_OXA-372                           | 2 | 0 | 0  | 0 | 0 | 0 | 0  | 1 | 1 | 1  | 0  | 0  | 0  | 0  | 1  | 1 | 0  | 0   | 0  | 0  | 0   | 0  | 0 | 0 |
| beta_lactam_OXA-437                           | 0 | 3 | 10 | 9 | 3 | 7 | 12 | 1 | 3 | 33 | 63 | 63 | 46 | 54 | 8  | 0 | 68 | 102 | 80 | 55 | 71  | 0  | 0 | 0 |
| beta_lactam_OXA-53                            | 0 | 0 | 1  | 0 | 0 | 0 | 0  | 0 | 1 | 0  | 0  | 0  | 0  | 0  | 0  | 0 | 0  | 0   | 0  | 0  | 0   | 0  | 0 | 0 |
| beta_lactam_OXA-727                           | 0 | 2 | 1  | 3 | 0 | 1 | 0  | 1 | 3 | 2  | 2  | 2  | 0  | 0  | 8  | 1 | 0  | 5   | 2  | 2  | 1   | 0  | 0 | 0 |
| beta_lactam_OXA-728                           | 1 | 3 | 3  | 2 | 0 | 3 | 0  | 1 | 4 | 2  | 5  | 1  | 0  | 0  | 7  | 0 | 1  | 1   | 0  | 0  | 0   | 0  | 0 | 0 |
| beta_lactam_OXA-9                             | 1 | 0 | 0  | 0 | 0 | 0 | 0  | 0 | 1 | 0  | 0  | 0  | 0  | 0  | 0  | 0 | 1  | 0   | 0  | 0  | 0   | 0  | 0 | 0 |
| beta_lactam_OXY-6-4                           | 0 | 0 | 0  | 0 | 0 | 0 | 0  | 0 | 1 | 0  | 0  | 0  | 0  | 0  | 0  | 0 | 0  | 0   | 0  | 0  | 0   | 0  | 0 | 0 |
| beta_lactam_PER-1                             | 1 | 1 | 0  | 1 | 0 | 0 | 2  | 1 | 0 | 0  | 0  | 0  | 0  | 1  | 1  | 0 | 1  | 2   | 0  | 3  | 1   | 0  | 0 | 0 |
| beta_lactam_PER-3                             | 1 | 0 | 1  | 1 | 0 | 0 | 1  | 1 | 0 | 2  | 2  | 0  | 0  | 2  | 0  | 0 | 0  | 3   | 0  | 2  | 0   | 0  | 0 | 0 |
| beta_lactam_SHV-123                           | 1 | 0 | 0  | 0 | 0 | 0 | 0  | 1 | 1 | 0  | 0  | 0  | 0  | 0  | 0  | 0 | 0  | 1   | 1  | 2  | 0   | 0  | 0 | 0 |
| beta_lactam_SHV-39                            | 1 | 0 | 1  | 0 | 0 | 1 | 3  | 1 | 1 | 1  | 0  | 0  | 0  | 0  | 0  | 1 | 0  | 2   | 0  | 1  | 0   | 0  | 0 | 0 |
| beta_lactam_TEM-193                           | 0 | 1 | 0  | 1 | 0 | 0 | 0  | 1 | 1 | 0  | 0  | 0  | 0  | 0  | 0  | 1 | 0  | 1   | 1  | 2  | 2   | 3  | 0 | 0 |
| beta_lactam_TEM-63                            | 0 | 0 | 0  | 0 | 0 | 0 | 0  | 0 | 1 | 0  | 0  | 0  | 0  | 0  | 0  | 0 | 0  | 0   | 0  | 0  | 0   | 0  | 0 | 0 |
| beta_lactam_TEM-7                             | 2 | 0 | 0  | 0 | 1 | 0 | 0  | 1 | 0 | 0  | 0  | 0  | 1  | 1  | 1  | 0 | 0  | 2   | 2  | 0  | 0   | 0  | 0 | 0 |
| beta_lactam_TEM-88                            | 0 | 0 | 0  | 0 | 0 | 0 | 0  | 0 | 1 | 0  | 0  | 0  | 0  | 0  | 0  | 0 | 0  | 0   | 0  | 0  | 0   | 0  | 0 | 0 |
| beta_lactam_TLA-2                             | 0 | 1 | 1  | 1 | 0 | 0 | 0  | 0 | 1 | 0  | 0  | 0  | 0  | 0  | 0  | 2 | 0  | 0   | 0  | 0  | 0   | 0  | 0 | 0 |
| beta_lactam_VEB-6                             | 3 | 1 | 1  | 2 | 1 | 1 | 3  | 1 | 1 | 0  | 0  | 0  | 0  | 1  | 4  | 0 | 0  | 0   | 0  | 0  | 0   | 0  | 0 | 0 |
| beta_lactam_VIM-17                            | 0 | 0 | 1  | 0 | 0 | 0 | 0  | 1 | 0 | 0  | 0  | 0  | 0  | 0  | 0  | 1 | 0  | 1   | 0  | 0  | 0   | 0  | 0 | 0 |
| beta_lactam_VIM-18                            | 1 | 1 | 0  | 1 | 0 | 2 | 1  | 1 | 0 | 1  | 2  | 0  | 0  | 0  | 2  | 0 | 0  | 0   | 0  | 0  | 0   | 0  | 0 | 0 |
| beta_lactam_VIM-20                            | 0 | 2 | 1  | 0 | 1 | 2 | 3  | 1 | 0 | 0  | 2  | 0  | 0  | 0  | 0  | 0 | 0  | 1   | 0  | 0  | 0   | 0  | 0 | 0 |
| beta_lactam_VIM-24                            | 0 | 0 | 0  | 2 | 0 | 0 | 0  | 1 | 1 | 0  | 0  | 1  | 0  | 0  | 0  | 0 | 0  | 0   | 0  | 0  | 1   | 0  | 0 | 0 |
| chloramphenicol_Agrobaacterium fabrum chloram | 0 | 4 | 2  | 0 | 0 | 0 | 4  | 1 | 0 | 3  | 1  | 1  | 0  | 0  | 0  | 0 | 0  | 0   | 3  | 0  | 0   | 0  | 0 | 0 |
| chloramphenicol_catA8                         | 1 | 2 | 1  | 2 | 0 | 0 | 0  | 1 | 0 | 6  | 0  | 1  | 0  | 0  | 1  | 0 | 0  | 0   | 0  | 0  | 0   | 0  | 0 | 0 |
| chloramphenicol_catD                          | 1 | 1 | 2  | 1 | 1 | 1 | 3  | 1 | 0 | 1  | 0  | 0  | 0  | 5  | 0  | 0 | 0  | 0   | 1  | 0  | 0   | 0  | 0 | 0 |
| chloramphenicol_catS                          | 0 | 0 | 1  | 1 | 0 | 1 | 0  | 1 | 0 | 0  | 0  | 0  | 0  | 0  | 1  | 0 | 0  | 0   | 3  | 0  | 0   | 0  | 0 | 0 |
| defensin_Bacillus subtilis mprF               | 1 | 1 | 2  | 3 | 0 | 0 | 0  | 1 | 1 | 3  | 1  | 4  | 1  | 2  | 1  | 0 | 3  | 0   | 4  | 1  | 2   | 0  | 0 | 0 |
| defensin_Dracontius mprF                      | 2 | 1 | 1  | 0 | 2 | 1 | 0  | 2 | 1 | 0  | 2  | 4  | 2  | 3  | 0  | 0 | 0  | 2   | 1  | 2  | 2   | 0  | 0 | 0 |
| fosfomycin_FosA5                              | 1 | 0 | 1  | 0 | 2 | 3 | 2  | 1 | 1 | 0  | 0  | 2  | 0  | 2  | 0  | 3 | 1  | 0   | 1  | 1  | 1   | 0  | 0 | 0 |
| fosfomycin_FosX                               | 2 | 1 | 2  | 0 | 0 | 0 | 1  | 1 | 0 | 1  | 1  | 0  | 0  | 0  | 3  | 0 | 0  | 1   | 0  | 0  | 0   | 1  | 0 | 0 |
| macrolide-lincosamide-streptogramin_cfr(E)    | 0 | 1 | 0  | 2 | 1 | 0 | 0  | 0 | 0 | 0  | 0  | 0  | 1  | 0  | 0  | 0 | 0  | 0   | 3  | 0  | 0   | 0  | 0 | 0 |
| macrolide-lincosamide-streptogramin_erm(42)   | 0 | 0 | 0  | 0 | 0 | 0 | 1  | 1 | 0 | 0  | 0  | 0  | 0  | 0  | 0  | 0 | 0  | 0   | 0  | 0  | 0   | 0  | 0 | 0 |
| macrolide-lincosamide-streptogramin_erm(47)   | 0 | 1 | 0  | 0 | 1 | 1 | 1  | 0 | 0 | 0  | 0  | 0  | 0  | 0  | 0  | 0 | 0  | 1   | 0  | 0  | 1   | 0  | 0 | 0 |
| macrolide-lincosamide-streptogramin_erm(Q)    | 0 | 0 | 0  | 0 | 0 | 3 | 0  | 0 | 1 | 0  | 1  | 0  | 0  | 0  | 0  | 0 | 0  | 0   | 0  | 0  | 0   | 0  | 0 | 0 |
| macrolide-lincosamide-streptogramin_erm(T)    | 1 | 0 | 0  | 0 | 0 | 1 | 0  | 1 | 0 | 0  | 0  | 0  | 0  | 0  | 1  | 0 | 0  | 0   | 0  | 0  | 0   | 0  | 0 | 0 |
| macrolide-lincosamide-streptogramin_lncG      | 2 | 3 | 0  | 0 | 0 | 0 | 1  | 1 | 1 | 0  | 0  | 0  | 0  | 1  | 4  | 2 | 0  | 2   | 1  | 1  | 0   | 0  | 0 | 0 |
| macrolide-lincosamide-streptogramin_lsa(A)    | 3 | 1 | 0  | 2 | 0 | 0 | 0  | 1 | 0 | 2  | 1  | 0  | 0  | 2  | 1  | 0 | 0  | 0   | 0  | 1  | 0   | 0  | 0 | 0 |
| macrolide-lincosamide-streptogramin_lsa(C)    | 0 | 0 | 0  | 0 | 0 | 1 | 2  | 1 | 0 | 1  | 0  | 3  | 0  | 3  | 0  | 0 | 0  | 1   | 0  | 0  | 0   | 0  | 0 | 0 |
| macrolide-lincosamide-streptogramin_mph(B)    | 0 | 0 | 1  | 0 | 1 | 1 | 0  | 1 | 0 | 1  | 0  | 0  | 0  | 0  | 1  | 0 | 0  | 0   | 0  | 0  | 0   | 0  | 0 | 0 |
| macrolide-lincosamide-streptogramin_mph(G)    | 5 | 3 | 9  | 2 | 0 | 2 | 0  | 1 | 1 | 2  | 1  | 2  | 0  | 2  | 9  | 1 | 0  | 0   | 0  | 0  | 3   | 1  | 0 | 0 |
| macrolide-lincosamide-streptogramin_mph(K)    | 2 | 2 | 2  | 0 | 0 | 0 | 0  | 1 | 1 | 0  | 0  | 0  | 0  | 2  | 0  | 0 | 0  | 0   | 0  | 1  | 0   | 0  | 0 | 0 |
| multidrug_bmr                                 | 0 | 0 | 0  | 1 | 0 | 1 | 0  | 1 | 2 | 2  | 0  | 0  | 0  | 1  | 0  | 1 | 0  | 0   | 0  | 0  | 1   | 0  | 0 | 0 |
| multidrug_emeA                                | 1 | 0 | 2  | 1 | 0 | 0 | 1  | 0 | 1 | 0  | 0  | 0  | 0  | 1  | 0  | 1 | 0  | 0   | 1  | 3  | 0   | 0  | 0 | 0 |
| multidrug_OpmH                                | 1 | 2 | 1  | 1 | 1 | 1 | 2  | 1 | 7 | 2  | 6  | 3  | 4  | 2  | 3  | 1 | 4  | 5   | 8  | 2  | 3   | 0  | 0 | 0 |
| multidrug_oprC                                | 0 | 1 | 1  | 1 | 0 | 1 | 0  | 1 | 0 | 1  | 1  | 0  | 0  | 1  | 1  | 0 | 1  | 0   | 1  | 2  | 1   | 0  | 0 | 0 |
| novobiocin_novA                               | 0 | 2 | 0  | 0 | 0 | 0 | 0  | 1 | 0 | 1  | 0  | 0  | 0  | 0  | 0  | 0 | 0  | 0   | 1  | 1  | 2   | 0  | 0 | 0 |
| polymyxin_mcr-10.1                            | 0 | 1 | 2  | 0 | 2 | 0 | 1  | 1 | 0 | 0  | 0  | 0  | 0  | 1  | 1  | 1 | 0  | 0   | 1  | 1  | 4   | 2  | 0 | 0 |
| polymyxin_mcr-3.3                             | 0 | 0 | 0  | 3 | 0 | 2 | 0  | 1 | 0 | 0  | 0  | 0  | 0  | 0  | 1  | 0 | 0  | 0   | 0  | 0  | 0   | 1  | 0 | 0 |
| polymyxin_mcr-3.5                             | 0 | 1 | 0  | 0 | 0 | 0 | 0  | 1 | 1 | 0  | 0  | 0  | 0  | 0  | 1  | 0 | 0  | 1   | 0  | 0  | 1   | 1  | 0 | 0 |
| quinolone_ltrA                                | 0 | 0 | 0  | 0 | 0 | 0 | 0  | 0 | 1 | 0  | 0  | 0  | 0  | 0  | 0  | 0 | 0  | 0   | 0  | 0  | 0   | 0  | 0 | 0 |
| quinolone_QnrA6                               | 0 | 1 | 1  | 0 | 0 | 0 | 0  | 1 | 0 | 0  | 0  | 0  | 0  | 0  | 1  | 0 | 1  | 0   | 0  | 0  | 0   | 0  | 0 | 0 |
| quinolone_QnrB19                              | 0 | 0 | 0  | 0 | 0 | 0 | 0  | 1 | 0 | 0  | 0  | 0  | 0  | 0  | 0  | 0 | 0  | 0   | 0  | 0  | 0   | 0  | 0 | 0 |
| quinolone_QnrB2                               | 0 | 0 | 0  | 0 | 0 | 0 | 0  | 0 | 1 | 0  | 0  | 0  | 0  | 0  | 0  | 0 | 0  | 0   | 0  | 0  | 0   | 0  | 0 | 0 |
| quinolone_QnrB27                              | 0 | 0 | 0  | 0 | 0 | 0 | 0  | 1 | 0 | 0  | 0  | 0  | 0  | 0  | 0  | 0 | 0  | 0   | 0  | 0  | 0   | 0  | 0 | 0 |
| quinolone_QnrB36                              | 2 | 1 | 2  | 1 | 0 | 1 | 0  | 1 | 0 | 2  | 1  | 0  | 0  | 3  | 0  | 1 | 2  | 0   | 0  | 1  | 0   | 0  | 0 | 0 |
| quinolone_QnrB64                              | 0 | 0 | 1  | 0 | 0 | 0 | 0  | 1 | 0 | 0  | 0  | 0  | 0  | 0  | 0  | 0 | 0  | 0   | 0  | 0  | 0   | 0  | 0 | 0 |
| quinolone_QnrB68                              | 0 | 0 | 0  | 0 | 0 | 0 | 0  | 1 | 0 | 0  | 0  | 0  | 0  | 0  | 0  | 0 | 0  | 0   | 0  | 0  | 0   | 0  | 0 | 0 |
| quinolone_QnrE1                               | 0 | 0 | 1  | 0 | 0 | 0 | 0  | 0 | 1 | 0  | 0  | 0  | 0  | 0  | 0  | 1 | 0  | 0   | 1  | 0  | 0   | 1  | 0 | 0 |
| quinolone_QnrVC3                              | 0 | 1 | 1  | 2 | 0 | 2 | 2  | 1 | 0 | 0  | 0  | 0  | 0  | 1  | 6  | 0 | 0  | 0   | 0  | 0  | 0   | 0  | 0 | 0 |
| quinolone_QnrVC6                              | 3 | 2 | 0  | 1 | 0 | 0 | 0  | 1 | 0 | 0  | 0  | 0  | 0  | 1  | 6  | 0 | 0  | 4   | 1  | 0  | 0   | 1  | 0 | 0 |

|                                            |   |   |   |   |   |   |   |   |   |   |   |   |   |   |   |   |   |   |   |   |   |
|--------------------------------------------|---|---|---|---|---|---|---|---|---|---|---|---|---|---|---|---|---|---|---|---|---|
| antibacterial_fatty_acid__farA             | 0 | 0 | 0 | 0 | 0 | 1 | 0 | 0 | 0 | 0 | 0 | 0 | 0 | 0 | 1 | 1 | 0 | 0 | 0 | 0 | 0 |
| antibacterial_fatty_acid__farB             | 0 | 0 | 0 | 0 | 1 | 0 | 0 | 0 | 0 | 0 | 0 | 0 | 0 | 0 | 0 | 0 | 0 | 0 | 1 | 0 | 0 |
| beta_lactam_ACG-1                          | 0 | 0 | 0 | 0 | 0 | 0 | 0 | 0 | 0 | 0 | 0 | 0 | 0 | 0 | 0 | 0 | 0 | 0 | 0 | 1 | 0 |
| beta_lactam_ACT-15                         | 0 | 0 | 0 | 0 | 0 | 0 | 0 | 0 | 0 | 0 | 0 | 0 | 0 | 0 | 0 | 0 | 0 | 0 | 0 | 0 | 0 |
| beta_lactam_ACT-16                         | 0 | 0 | 0 | 0 | 0 | 0 | 0 | 0 | 0 | 0 | 0 | 1 | 0 | 0 | 0 | 0 | 0 | 0 | 0 | 0 | 0 |
| beta_lactam_ACT-17                         | 0 | 0 | 0 | 0 | 0 | 0 | 0 | 0 | 0 | 0 | 0 | 0 | 1 | 0 | 0 | 0 | 0 | 0 | 0 | 1 | 1 |
| beta_lactam_ACT-2                          | 0 | 0 | 0 | 0 | 0 | 0 | 0 | 0 | 0 | 0 | 0 | 0 | 0 | 0 | 0 | 0 | 0 | 0 | 0 | 0 | 4 |
| beta_lactam_ACT-20                         | 0 | 0 | 0 | 0 | 0 | 0 | 0 | 0 | 1 | 0 | 0 | 0 | 0 | 0 | 0 | 0 | 0 | 0 | 0 | 0 | 0 |
| beta_lactam_ACT-22                         | 0 | 0 | 0 | 0 | 0 | 0 | 0 | 0 | 0 | 0 | 0 | 0 | 0 | 0 | 0 | 0 | 0 | 0 | 0 | 0 | 0 |
| beta_lactam_ACT-27                         | 0 | 0 | 0 | 0 | 0 | 0 | 0 | 0 | 0 | 0 | 0 | 0 | 0 | 0 | 0 | 0 | 0 | 0 | 0 | 0 | 1 |
| beta_lactam_ACT-29                         | 1 | 0 | 0 | 0 | 1 | 0 | 0 | 0 | 0 | 2 | 0 | 0 | 2 | 0 | 0 | 0 | 1 | 1 | 0 | 3 | 4 |
| beta_lactam_ACT-3                          | 0 | 0 | 0 | 0 | 0 | 0 | 0 | 0 | 0 | 0 | 0 | 0 | 0 | 0 | 0 | 0 | 0 | 0 | 0 | 0 | 1 |
| beta_lactam_ACT-37                         | 0 | 0 | 0 | 0 | 0 | 0 | 0 | 0 | 0 | 0 | 1 | 0 | 0 | 0 | 1 | 0 | 0 | 0 | 1 | 0 | 0 |
| beta_lactam_ACT-4                          | 0 | 0 | 0 | 0 | 0 | 0 | 0 | 0 | 1 | 0 | 0 | 0 | 0 | 0 | 0 | 0 | 0 | 0 | 0 | 1 | 0 |
| beta_lactam_ACT-8                          | 0 | 0 | 0 | 0 | 0 | 0 | 0 | 0 | 0 | 0 | 1 | 0 | 0 | 0 | 0 | 0 | 0 | 1 | 0 | 1 | 0 |
| beta_lactam_ACT-9                          | 0 | 0 | 0 | 0 | 0 | 0 | 0 | 0 | 0 | 0 | 0 | 1 | 0 | 0 | 0 | 0 | 0 | 0 | 0 | 0 | 0 |
| beta_lactam_ADC-12                         | 0 | 0 | 0 | 0 | 0 | 0 | 0 | 0 | 0 | 0 | 0 | 0 | 0 | 0 | 0 | 0 | 0 | 0 | 1 | 0 | 0 |
| beta_lactam_ADC-13                         | 0 | 0 | 0 | 0 | 0 | 0 | 0 | 0 | 1 | 0 | 0 | 0 | 0 | 0 | 0 | 0 | 0 | 0 | 0 | 3 | 0 |
| beta_lactam_ADC-15                         | 0 | 0 | 1 | 0 | 0 | 0 | 0 | 0 | 0 | 0 | 1 | 0 | 0 | 0 | 0 | 0 | 0 | 1 | 0 | 0 | 0 |
| beta_lactam_ADC-17                         | 0 | 0 | 0 | 0 | 0 | 0 | 0 | 0 | 0 | 0 | 0 | 0 | 0 | 0 | 0 | 0 | 0 | 0 | 1 | 1 | 0 |
| beta_lactam_ADC-19                         | 0 | 0 | 0 | 0 | 0 | 0 | 0 | 0 | 0 | 0 | 0 | 0 | 0 | 0 | 0 | 0 | 0 | 2 | 1 | 2 | 0 |
| beta_lactam_ADC-22                         | 0 | 0 | 0 | 0 | 0 | 0 | 0 | 0 | 0 | 0 | 0 | 0 | 0 | 0 | 0 | 0 | 0 | 0 | 2 | 1 | 0 |
| beta_lactam_ADC-25                         | 0 | 0 | 0 | 0 | 0 | 0 | 0 | 0 | 0 | 0 | 0 | 1 | 0 | 0 | 0 | 0 | 0 | 0 | 0 | 0 | 0 |
| beta_lactam_ADC-41                         | 0 | 0 | 0 | 0 | 0 | 0 | 0 | 0 | 0 | 0 | 0 | 0 | 0 | 0 | 0 | 0 | 0 | 0 | 0 | 1 | 0 |
| beta_lactam_ADC-42                         | 0 | 0 | 0 | 0 | 0 | 0 | 0 | 0 | 0 | 0 | 0 | 0 | 0 | 0 | 0 | 0 | 0 | 0 | 5 | 2 | 0 |
| beta_lactam_ADC-44                         | 0 | 0 | 0 | 0 | 0 | 0 | 0 | 0 | 0 | 1 | 0 | 0 | 0 | 0 | 0 | 0 | 0 | 0 | 0 | 0 | 0 |
| beta_lactam_ADC-6                          | 0 | 1 | 0 | 0 | 0 | 0 | 0 | 0 | 0 | 0 | 0 | 0 | 0 | 0 | 0 | 0 | 1 | 0 | 1 | 0 | 0 |
| beta_lactam_ADC-77                         | 0 | 0 | 0 | 0 | 0 | 0 | 0 | 0 | 0 | 0 | 0 | 0 | 0 | 0 | 0 | 0 | 0 | 0 | 0 | 0 | 0 |
| beta_lactam_ADC-79                         | 0 | 0 | 0 | 0 | 0 | 1 | 0 | 0 | 0 | 0 | 0 | 0 | 0 | 0 | 0 | 0 | 0 | 0 | 0 | 0 | 1 |
| beta_lactam_AIM-1                          | 0 | 0 | 0 | 0 | 0 | 0 | 0 | 0 | 0 | 0 | 2 | 0 | 0 | 0 | 0 | 0 | 0 | 0 | 0 | 0 | 0 |
| beta_lactam_AQU-2                          | 0 | 0 | 0 | 0 | 0 | 0 | 0 | 0 | 0 | 0 | 0 | 0 | 0 | 0 | 0 | 0 | 0 | 0 | 0 | 0 | 0 |
| beta_lactam_AXG-1                          | 0 | 0 | 0 | 0 | 0 | 0 | 0 | 0 | 0 | 0 | 0 | 0 | 0 | 0 | 0 | 0 | 0 | 0 | 0 | 1 | 0 |
| beta_lactam_AXG-2                          | 0 | 0 | 0 | 0 | 0 | 0 | 0 | 0 | 0 | 0 | 0 | 0 | 0 | 0 | 0 | 0 | 0 | 0 | 0 | 0 | 0 |
| beta_lactam_BEL-2                          | 0 | 0 | 0 | 0 | 0 | 0 | 0 | 0 | 0 | 0 | 0 | 0 | 0 | 0 | 0 | 0 | 0 | 0 | 0 | 0 | 0 |
| beta_lactam_BES-1                          | 0 | 0 | 0 | 0 | 0 | 0 | 1 | 0 | 0 | 0 | 0 | 0 | 0 | 0 | 0 | 0 | 0 | 0 | 0 | 0 | 0 |
| beta_lactam_BKG-1                          | 0 | 0 | 1 | 0 | 0 | 0 | 0 | 0 | 0 | 0 | 1 | 0 | 0 | 0 | 0 | 0 | 0 | 0 | 0 | 0 | 0 |
| beta_lactam_Bla1                           | 1 | 0 | 0 | 0 | 1 | 0 | 0 | 0 | 0 | 0 | 0 | 1 | 0 | 0 | 0 | 0 | 0 | 0 | 0 | 0 | 0 |
| beta_lactam_blaZ                           | 0 | 0 | 0 | 0 | 0 | 0 | 0 | 0 | 0 | 0 | 0 | 0 | 0 | 0 | 0 | 0 | 0 | 0 | 0 | 1 | 0 |
| beta_lactam_CAR-1                          | 0 | 0 | 0 | 0 | 0 | 0 | 0 | 0 | 0 | 0 | 1 | 0 | 0 | 0 | 0 | 0 | 0 | 0 | 0 | 0 | 0 |
| beta_lactam_CARB-12                        | 0 | 0 | 0 | 0 | 0 | 0 | 0 | 0 | 0 | 0 | 0 | 0 | 0 | 0 | 0 | 1 | 0 | 0 | 0 | 0 | 0 |
| beta_lactam_CARB-6                         | 0 | 0 | 0 | 0 | 0 | 0 | 0 | 0 | 0 | 0 | 0 | 0 | 0 | 0 | 0 | 0 | 0 | 0 | 0 | 0 | 0 |
| beta_lactam_CAU-1                          | 1 | 0 | 0 | 0 | 0 | 0 | 0 | 0 | 0 | 0 | 0 | 0 | 0 | 0 | 0 | 0 | 0 | 0 | 0 | 0 | 0 |
| beta_lactam_CGA-1                          | 0 | 0 | 0 | 0 | 0 | 0 | 1 | 0 | 0 | 0 | 0 | 0 | 0 | 0 | 0 | 0 | 0 | 0 | 0 | 0 | 0 |
| beta_lactam_Chrysobacterium meningosepticu | 0 | 0 | 1 | 0 | 0 | 0 | 0 | 0 | 0 | 0 | 0 | 0 | 0 | 0 | 1 | 0 | 0 | 0 | 0 | 0 | 0 |
| beta_lactam_CME-1                          | 0 | 0 | 0 | 0 | 0 | 0 | 0 | 0 | 0 | 1 | 2 | 0 | 0 | 0 | 0 | 0 | 0 | 0 | 0 | 1 | 0 |
| beta_lactam_CMY-1                          | 0 | 0 | 0 | 0 | 0 | 0 | 0 | 0 | 1 | 0 | 0 | 0 | 1 | 0 | 0 | 0 | 1 | 0 | 0 | 0 | 0 |
| beta_lactam_CMY-103                        | 0 | 1 | 0 | 0 | 0 | 0 | 0 | 0 | 0 | 0 | 0 | 0 | 0 | 0 | 0 | 0 | 0 | 0 | 1 | 0 | 0 |
| beta_lactam_CMY-104                        | 1 | 0 | 0 | 0 | 0 | 0 | 0 | 0 | 0 | 0 | 0 | 1 | 0 | 0 | 1 | 0 | 0 | 0 | 0 | 0 | 0 |
| beta_lactam_CMY-112                        | 1 | 1 | 0 | 2 | 0 | 0 | 0 | 0 | 0 | 0 | 1 | 0 | 0 | 0 | 2 | 1 | 0 | 0 | 0 | 0 | 0 |
| beta_lactam_CMY-115                        | 0 | 3 | 0 | 1 | 0 | 0 | 1 | 0 | 0 | 0 | 0 | 0 | 0 | 0 | 0 | 1 | 0 | 0 | 0 | 0 | 0 |
| beta_lactam_CMY-116                        | 0 | 0 | 0 | 0 | 0 | 0 | 0 | 0 | 0 | 0 | 1 | 0 | 0 | 0 | 0 | 0 | 0 | 0 | 0 | 0 | 0 |
| beta_lactam_CMY-119                        | 0 | 0 | 0 | 0 | 0 | 0 | 0 | 0 | 0 | 0 | 0 | 0 | 0 | 0 | 0 | 0 | 0 | 0 | 0 | 0 | 1 |
| beta_lactam_CMY-135                        | 2 | 5 | 8 | 4 | 0 | 0 | 0 | 0 | 0 | 0 | 0 | 0 | 0 | 0 | 4 | 2 | 0 | 0 | 1 | 0 | 0 |
| beta_lactam_CMY-15                         | 0 | 0 | 0 | 0 | 0 | 1 | 0 | 0 | 0 | 0 | 0 | 0 | 0 | 0 | 0 | 0 | 0 | 0 | 0 | 0 | 0 |
| beta_lactam_CMY-20                         | 0 | 0 | 0 | 0 | 0 | 0 | 0 | 0 | 0 | 0 | 0 | 0 | 0 | 0 | 1 | 0 | 0 | 0 | 0 | 0 | 0 |
| beta_lactam_CMY-27                         | 2 | 0 | 1 | 0 | 0 | 0 | 0 | 0 | 0 | 1 | 0 | 0 | 0 | 0 | 1 | 0 | 0 | 0 | 0 | 0 | 0 |
| beta_lactam_CMY-33                         | 0 | 0 | 2 | 0 | 0 | 0 | 0 | 0 | 0 | 0 | 1 | 0 | 0 | 0 | 0 | 0 | 0 | 0 | 0 | 0 | 0 |
| beta_lactam_CMY-35                         | 0 | 0 | 0 | 0 | 0 | 0 | 0 | 0 | 0 | 0 | 0 | 0 | 0 | 0 | 0 | 0 | 0 | 1 | 0 | 0 | 0 |
| beta_lactam_CMY-37                         | 0 | 0 | 0 | 0 | 1 | 0 | 0 | 0 | 0 | 0 | 1 | 0 | 0 | 0 | 0 | 1 | 0 | 1 | 1 | 0 | 0 |
| beta_lactam_CMY-38                         | 0 | 0 | 0 | 0 | 0 | 0 | 0 | 0 | 0 | 0 | 0 | 0 | 0 | 0 | 0 | 0 | 0 | 1 | 0 | 0 | 0 |
| beta_lactam_CMY-39                         | 0 | 0 | 0 | 0 | 0 | 0 | 0 | 0 | 0 | 0 | 0 | 1 | 0 | 0 | 0 | 0 | 0 | 0 | 0 | 0 | 0 |
| beta_lactam_CMY-40                         | 1 | 0 | 0 | 0 | 0 | 0 | 0 | 0 | 0 | 0 | 0 | 0 | 0 | 0 | 0 | 0 | 0 | 0 | 0 | 0 | 0 |
| beta_lactam_CMY-41                         | 1 | 3 | 0 | 2 | 0 | 0 | 0 | 0 | 0 | 0 | 2 | 0 | 0 | 0 | 0 | 0 | 0 | 0 | 0 | 0 | 0 |
| beta_lactam_CMY-42                         | 0 | 0 | 0 | 1 | 0 | 0 | 0 | 0 | 0 | 0 | 0 | 0 | 0 | 0 | 1 | 0 | 0 | 0 | 0 | 0 | 0 |
| beta_lactam_CMY-46                         | 0 | 0 | 0 | 2 | 0 | 0 | 0 | 0 | 0 | 0 | 0 | 1 | 0 | 0 | 1 | 0 | 0 | 0 | 0 | 0 | 0 |
| beta_lactam_CMY-49                         | 0 | 0 | 0 | 1 | 0 | 0 | 0 | 0 | 0 | 0 | 0 | 0 | 0 | 0 | 0 | 0 | 0 | 0 | 0 | 0 | 0 |
| beta_lactam_CMY-50                         | 0 | 1 | 0 | 0 | 0 | 0 | 0 | 0 | 0 | 0 | 0 | 0 | 0 | 0 | 0 | 0 | 0 | 0 | 0 | 0 | 0 |
| beta_lactam_CMY-61                         | 1 | 0 | 0 | 0 | 0 | 0 | 0 | 0 | 0 | 0 | 0 | 0 | 0 | 0 | 0 | 0 | 0 | 0 | 0 | 0 | 0 |
| beta_lactam_CMY-63                         | 0 | 0 | 0 | 1 | 0 | 0 | 0 | 0 | 0 | 0 | 0 | 0 | 0 | 0 | 0 | 1 | 0 | 0 | 0 | 0 | 0 |
| beta_lactam_CMY-66                         | 2 | 2 | 1 | 0 | 0 | 1 | 0 | 0 | 0 | 1 | 2 | 1 | 0 | 0 | 1 | 1 | 0 | 0 | 0 | 0 | 0 |
| beta_lactam_CMY-67                         | 0 | 0 | 0 | 0 | 0 | 0 | 0 | 0 | 0 | 0 | 0 | 0 | 0 | 0 | 1 | 0 | 0 | 0 | 0 | 0 | 0 |
| beta_lactam_CMY-70                         | 0 | 1 | 2 | 0 | 0 | 0 | 0 | 0 | 0 | 0 | 0 | 0 | 0 | 0 | 0 | 0 | 1 | 0 | 0 | 0 | 0 |
| beta_lactam_CMY-72                         | 0 | 0 | 0 | 2 | 0 | 0 | 0 | 0 | 0 | 0 | 0 | 0 | 0 | 0 | 0 | 0 | 0 | 0 | 0 | 0 | 0 |
| beta_lactam_CMY-73                         | 0 | 0 | 1 | 1 | 0 | 0 | 0 | 0 | 0 | 0 | 0 | 0 | 0 | 0 | 0 | 0 | 0 | 0 | 0 | 0 | 0 |
| beta_lactam_CMY-74                         | 1 | 0 | 0 | 0 | 0 | 0 | 0 | 0 | 0 | 0 | 1 | 1 | 0 | 0 | 0 | 1 | 0 | 0 | 0 | 1 | 0 |
| beta_lactam_CMY-75                         | 0 | 0 | 0 | 0 | 0 | 0 | 0 | 0 | 0 | 0 | 1 | 0 | 0 | 0 | 0 | 0 | 0 | 0 | 0 | 0 | 0 |
| beta_lactam_CMY-76                         | 0 | 0 | 0 | 0 | 0 | 0 | 1 | 0 | 0 | 0 | 0 | 0 | 0 | 0 | 0 | 0 | 0 | 0 | 0 | 0 | 0 |
| beta_lactam_CMY-77                         | 0 | 1 | 0 | 0 | 0 | 0 | 0 | 0 | 0 | 0 | 0 | 0 | 0 | 1 | 0 | 0 | 0 | 0 | 1 | 0 | 0 |
| beta_lactam_CMY-78                         | 0 | 0 | 0 | 0 | 0 | 0 | 0 | 0 | 0 | 1 | 0 | 0 | 0 | 0 | 1 | 0 | 0 | 0 | 0 | 0 | 0 |
| beta_lactam_CMY-79                         | 0 | 0 | 1 | 0 | 0 | 0 | 0 | 0 | 0 | 0 | 0 | 0 | 0 | 0 | 0 | 0 | 0 | 0 | 0 | 0 | 0 |
| beta_lactam_CMY-81                         | 0 | 1 | 0 | 0 | 0 | 0 | 0 | 0 | 0 | 0 | 0 | 0 | 0 | 0 | 0 | 0 | 0 | 0 | 0 | 0 | 0 |
| beta_lactam_CMY-83                         | 0 | 0 | 0 | 0 | 0 | 0 | 0 | 0 | 0 | 0 | 0 | 0 | 0 | 0 | 0 | 0 | 0 | 0 | 0 | 0 | 0 |
| beta_lactam_CMY-84                         | 1 | 1 | 0 | 0 | 0 | 0 | 0 | 0 | 0 | 0 | 0 | 0 | 0 | 0 | 0 | 0 | 0 | 0 | 0 | 1 | 0 |
| beta_lactam_CMY-90                         | 1 | 1 | 0 | 1 | 0 | 0 | 0 | 0 | 0 | 0 | 1 | 0 | 0 | 0 | 1 | 0 | 0 | 0 | 0 | 0 | 0 |
| beta_lactam_CMY-93                         | 0 | 0 | 0 | 0 | 2 | 1 | 0 | 0 | 0 | 1 | 0 | 1 | 0 | 0 | 2 | 1 | 0 | 2 | 1 | 0 | 1 |
| beta_lactam_CMY-94                         | 0 | 0 | 0 | 0 | 0 | 0 | 0 | 0 | 0 | 0 | 0 | 0 | 0 | 0 | 0 | 0 | 0 | 1 | 0 | 0 | 0 |
| beta_lactam_cphA4                          |   |   |   |   |   |   |   |   |   |   |   |   |   |   |   |   |   |   |   |   |   |

|                                           |   |   |   |   |   |   |   |   |   |   |   |   |    |    |   |   |   |   |
|-------------------------------------------|---|---|---|---|---|---|---|---|---|---|---|---|----|----|---|---|---|---|
| beta_lactam__IMP-13                       | 0 | 0 | 1 | 2 | 0 | 0 | 0 | 0 | 1 | 0 | 0 | 0 | 0  | 0  | 0 | 0 | 1 | 0 |
| beta_lactam__IMP-21                       | 0 | 0 | 2 | 0 | 0 | 0 | 0 | 0 | 0 | 0 | 0 | 1 | 0  | 2  | 0 | 2 | 3 | 1 |
| beta_lactam__IMP-25                       | 0 | 0 | 0 | 0 | 1 | 0 | 0 | 0 | 0 | 0 | 0 | 0 | 0  | 0  | 0 | 0 | 0 | 0 |
| beta_lactam__IMP-30                       | 0 | 0 | 0 | 0 | 0 | 0 | 0 | 0 | 0 | 0 | 0 | 0 | 0  | 0  | 0 | 0 | 0 | 0 |
| beta_lactam__IMP-34                       | 1 | 0 | 0 | 0 | 0 | 0 | 0 | 1 | 0 | 0 | 0 | 1 | 0  | 0  | 0 | 1 | 0 | 0 |
| beta_lactam__IMP-37                       | 0 | 0 | 0 | 1 | 0 | 0 | 2 | 0 | 0 | 0 | 0 | 0 | 2  | 0  | 1 | 1 | 1 | 0 |
| beta_lactam__IMP-4                        | 0 | 0 | 0 | 0 | 0 | 0 | 0 | 0 | 0 | 0 | 0 | 0 | 0  | 1  | 0 | 0 | 0 | 0 |
| beta_lactam__IMP-41                       | 0 | 1 | 0 | 0 | 0 | 0 | 0 | 0 | 0 | 1 | 0 | 0 | 0  | 1  | 0 | 2 | 0 | 1 |
| beta_lactam__IMP-5                        | 0 | 0 | 0 | 0 | 0 | 0 | 0 | 0 | 0 | 0 | 0 | 0 | 0  | 0  | 1 | 0 | 0 | 0 |
| beta_lactam__IMP-52                       | 0 | 0 | 0 | 0 | 0 | 0 | 0 | 0 | 0 | 1 | 0 | 1 | 0  | 1  | 0 | 0 | 0 | 1 |
| beta_lactam__IMP-6                        | 0 | 0 | 0 | 1 | 0 | 0 | 0 | 0 | 0 | 0 | 0 | 0 | 0  | 1  | 0 | 0 | 0 | 0 |
| beta_lactam__IMP-8                        | 0 | 0 | 0 | 0 | 0 | 0 | 0 | 0 | 0 | 0 | 0 | 0 | 0  | 1  | 0 | 0 | 0 | 0 |
| beta_lactam__IMP-9                        | 0 | 0 | 0 | 0 | 0 | 0 | 0 | 0 | 0 | 0 | 0 | 0 | 0  | 1  | 0 | 0 | 0 | 0 |
| beta_lactam__L1 beta-lactamase            | 0 | 0 | 0 | 1 | 0 | 0 | 0 | 0 | 0 | 0 | 0 | 0 | 0  | 0  | 0 | 0 | 0 | 0 |
| beta_lactam__LAP-1                        | 1 | 0 | 0 | 0 | 1 | 0 | 0 | 0 | 0 | 1 | 0 | 0 | 0  | 0  | 0 | 0 | 0 | 0 |
| beta_lactam__LAP-2                        | 0 | 1 | 0 | 0 | 0 | 1 | 0 | 0 | 0 | 0 | 1 | 1 | 0  | 0  | 0 | 2 | 4 | 1 |
| beta_lactam__LEN-10                       | 0 | 0 | 0 | 0 | 0 | 1 | 0 | 0 | 0 | 0 | 0 | 0 | 0  | 0  | 0 | 0 | 0 | 0 |
| beta_lactam__LEN-7                        | 0 | 0 | 0 | 0 | 0 | 1 | 0 | 0 | 0 | 0 | 0 | 0 | 0  | 0  | 0 | 0 | 0 | 0 |
| beta_lactam__LRA-10                       | 0 | 0 | 0 | 0 | 0 | 0 | 0 | 0 | 0 | 0 | 0 | 0 | 0  | 0  | 0 | 0 | 0 | 0 |
| beta_lactam__MIR-23                       | 0 | 0 | 0 | 0 | 0 | 0 | 0 | 0 | 0 | 1 | 0 | 0 | 0  | 0  | 0 | 1 | 0 | 1 |
| beta_lactam__MIR-5                        | 0 | 0 | 0 | 0 | 0 | 0 | 0 | 0 | 0 | 1 | 0 | 0 | 0  | 0  | 0 | 0 | 0 | 0 |
| beta_lactam__MIR-9                        | 0 | 0 | 0 | 1 | 0 | 1 | 0 | 0 | 0 | 0 | 0 | 0 | 0  | 0  | 0 | 0 | 0 | 1 |
| beta_lactam__MOX-5                        | 1 | 0 | 1 | 0 | 0 | 0 | 0 | 1 | 0 | 0 | 0 | 0 | 0  | 1  | 0 | 0 | 0 | 0 |
| beta_lactam__MOX-6                        | 0 | 0 | 0 | 0 | 0 | 0 | 0 | 0 | 0 | 0 | 0 | 0 | 0  | 1  | 0 | 0 | 0 | 1 |
| beta_lactam__MOX-8                        | 2 | 2 | 1 | 0 | 0 | 2 | 0 | 0 | 0 | 1 | 4 | 0 | 1  | 2  | 1 | 1 | 3 | 0 |
| beta_lactam__mraA                         | 0 | 0 | 2 | 0 | 0 | 0 | 1 | 0 | 0 | 0 | 0 | 0 | 0  | 0  | 0 | 0 | 0 | 0 |
| beta_lactam__OCH-1                        | 0 | 0 | 0 | 0 | 0 | 0 | 0 | 0 | 0 | 0 | 0 | 0 | 0  | 0  | 0 | 0 | 0 | 0 |
| beta_lactam__OCH-3                        | 0 | 1 | 0 | 0 | 0 | 0 | 1 | 0 | 0 | 0 | 0 | 0 | 0  | 0  | 0 | 0 | 1 | 0 |
| beta_lactam__OCH-4                        | 0 | 0 | 0 | 0 | 0 | 0 | 0 | 0 | 0 | 1 | 0 | 0 | 0  | 0  | 1 | 0 | 0 | 0 |
| beta_lactam__OCH-5                        | 0 | 0 | 0 | 1 | 0 | 0 | 0 | 0 | 0 | 0 | 0 | 0 | 0  | 0  | 0 | 0 | 0 | 0 |
| beta_lactam__OCH-6                        | 0 | 0 | 0 | 1 | 0 | 1 | 0 | 1 | 0 | 0 | 0 | 0 | 0  | 0  | 0 | 0 | 0 | 0 |
| beta_lactam__OCH-7                        | 0 | 1 | 0 | 0 | 0 | 0 | 0 | 0 | 0 | 0 | 0 | 0 | 0  | 0  | 0 | 0 | 0 | 0 |
| beta_lactam__OCH-8                        | 0 | 0 | 0 | 0 | 0 | 0 | 0 | 0 | 0 | 1 | 0 | 0 | 0  | 0  | 0 | 1 | 0 | 0 |
| beta_lactam__OKP-A-11                     | 0 | 0 | 0 | 0 | 0 | 0 | 0 | 0 | 0 | 0 | 0 | 0 | 0  | 0  | 0 | 0 | 0 | 0 |
| beta_lactam__OKP-A-12                     | 0 | 0 | 0 | 0 | 0 | 0 | 0 | 0 | 0 | 0 | 0 | 0 | 0  | 0  | 0 | 0 | 0 | 0 |
| beta_lactam__OKP-A-16                     | 0 | 0 | 0 | 0 | 0 | 0 | 0 | 0 | 0 | 0 | 0 | 0 | 0  | 0  | 0 | 0 | 1 | 0 |
| beta_lactam__OKP-B-10                     | 0 | 0 | 0 | 0 | 0 | 0 | 0 | 0 | 0 | 0 | 0 | 0 | 0  | 0  | 0 | 0 | 0 | 0 |
| beta_lactam__OKP-B-12                     | 0 | 0 | 1 | 0 | 0 | 0 | 0 | 0 | 0 | 0 | 0 | 0 | 0  | 0  | 0 | 0 | 0 | 0 |
| beta_lactam__OKP-B-13                     | 0 | 0 | 1 | 0 | 0 | 0 | 0 | 0 | 0 | 0 | 0 | 0 | 0  | 0  | 0 | 0 | 0 | 0 |
| beta_lactam__OKP-B-18                     | 0 | 0 | 0 | 0 | 0 | 0 | 0 | 0 | 0 | 0 | 0 | 0 | 0  | 0  | 0 | 0 | 0 | 0 |
| beta_lactam__OKP-B-2                      | 0 | 0 | 0 | 0 | 0 | 0 | 0 | 0 | 0 | 0 | 0 | 0 | 0  | 0  | 0 | 0 | 1 | 0 |
| beta_lactam__OKP-B-6                      | 0 | 0 | 0 | 0 | 0 | 0 | 0 | 0 | 0 | 0 | 0 | 0 | 0  | 0  | 0 | 0 | 0 | 0 |
| beta_lactam__OKP-B-7                      | 0 | 0 | 0 | 0 | 0 | 0 | 0 | 0 | 0 | 0 | 0 | 0 | 1  | 0  | 0 | 0 | 0 | 0 |
| beta_lactam__ORN-1                        | 0 | 0 | 0 | 0 | 0 | 0 | 0 | 0 | 0 | 0 | 0 | 0 | 0  | 0  | 0 | 0 | 0 | 0 |
| beta_lactam__ORN-2                        | 0 | 0 | 1 | 1 | 0 | 0 | 1 | 0 | 0 | 0 | 0 | 0 | 1  | 0  | 0 | 2 | 0 | 0 |
| beta_lactam__ORN-4                        | 0 | 0 | 0 | 0 | 0 | 1 | 0 | 0 | 0 | 1 | 0 | 0 | 1  | 0  | 0 | 0 | 1 | 0 |
| beta_lactam__ORN-6                        | 0 | 0 | 0 | 0 | 0 | 0 | 0 | 0 | 0 | 1 | 0 | 0 | 0  | 0  | 0 | 0 | 0 | 0 |
| beta_lactam__Other class C beta-lactamase | 0 | 0 | 0 | 1 | 0 | 0 | 1 | 0 | 0 | 0 | 0 | 0 | 0  | 0  | 0 | 0 | 0 | 0 |
| beta_lactam__OXA-100                      | 0 | 1 | 0 | 0 | 0 | 0 | 0 | 0 | 0 | 0 | 0 | 0 | 0  | 0  | 0 | 0 | 0 | 0 |
| beta_lactam__OXA-101                      | 0 | 0 | 1 | 0 | 0 | 0 | 0 | 0 | 0 | 0 | 0 | 0 | 0  | 0  | 0 | 0 | 0 | 0 |
| beta_lactam__OXA-114a                     | 0 | 0 | 0 | 0 | 0 | 0 | 0 | 0 | 0 | 0 | 0 | 0 | 0  | 0  | 0 | 0 | 0 | 0 |
| beta_lactam__OXA-129                      | 0 | 0 | 0 | 0 | 0 | 0 | 0 | 1 | 0 | 0 | 0 | 0 | 0  | 0  | 0 | 1 | 2 | 0 |
| beta_lactam__OXA-142                      | 0 | 0 | 0 | 2 | 0 | 0 | 0 | 0 | 0 | 0 | 0 | 0 | 0  | 0  | 0 | 0 | 0 | 0 |
| beta_lactam__OXA-145                      | 1 | 0 | 0 | 0 | 0 | 0 | 0 | 0 | 0 | 0 | 0 | 0 | 0  | 0  | 0 | 0 | 0 | 0 |
| beta_lactam__OXA-160                      | 0 | 0 | 0 | 0 | 0 | 0 | 0 | 0 | 0 | 0 | 0 | 1 | 1  | 0  | 0 | 1 | 2 | 1 |
| beta_lactam__OXA-17                       | 0 | 0 | 1 | 0 | 0 | 0 | 0 | 0 | 0 | 0 | 0 | 0 | 0  | 0  | 0 | 1 | 0 | 0 |
| beta_lactam__OXA-173                      | 0 | 0 | 0 | 0 | 0 | 0 | 0 | 0 | 1 | 0 | 0 | 0 | 0  | 0  | 0 | 0 | 0 | 0 |
| beta_lactam__OXA-182                      | 0 | 0 | 0 | 0 | 0 | 0 | 0 | 0 | 0 | 0 | 0 | 0 | 1  | 0  | 0 | 0 | 0 | 0 |
| beta_lactam__OXA-183                      | 2 | 1 | 0 | 0 | 0 | 0 | 1 | 0 | 0 | 0 | 0 | 0 | 0  | 0  | 0 | 0 | 0 | 0 |
| beta_lactam__OXA-19                       | 0 | 1 | 0 | 0 | 1 | 0 | 0 | 0 | 0 | 0 | 0 | 0 | 0  | 0  | 0 | 0 | 0 | 0 |
| beta_lactam__OXA-21                       | 0 | 0 | 0 | 0 | 0 | 0 | 0 | 0 | 0 | 1 | 0 | 0 | 0  | 0  | 1 | 0 | 1 | 1 |
| beta_lactam__OXA-225                      | 0 | 0 | 0 | 0 | 0 | 0 | 0 | 0 | 0 | 0 | 0 | 0 | 0  | 1  | 0 | 0 | 0 | 0 |
| beta_lactam__OXA-228                      | 0 | 0 | 0 | 0 | 0 | 0 | 0 | 0 | 0 | 0 | 0 | 0 | 0  | 1  | 0 | 0 | 0 | 1 |
| beta_lactam__OXA-233                      | 0 | 0 | 1 | 0 | 0 | 0 | 0 | 0 | 0 | 0 | 0 | 0 | 0  | 0  | 0 | 0 | 0 | 0 |
| beta_lactam__OXA-239                      | 0 | 1 | 0 | 0 | 0 | 0 | 0 | 0 | 0 | 0 | 0 | 0 | 0  | 0  | 0 | 0 | 0 | 0 |
| beta_lactam__OXA-24                       | 0 | 0 | 0 | 0 | 0 | 0 | 0 | 0 | 2 | 1 | 4 | 1 | 2  | 1  | 0 | 2 | 1 | 1 |
| beta_lactam__OXA-253                      | 0 | 0 | 0 | 0 | 0 | 0 | 0 | 0 | 1 | 0 | 0 | 1 | 0  | 0  | 0 | 0 | 0 | 0 |
| beta_lactam__OXA-255                      | 0 | 0 | 0 | 0 | 0 | 0 | 0 | 0 | 0 | 1 | 0 | 1 | 0  | 0  | 1 | 0 | 0 | 0 |
| beta_lactam__OXA-26                       | 0 | 0 | 1 | 0 | 0 | 0 | 1 | 0 | 0 | 2 | 2 | 2 | 4  | 0  | 2 | 5 | 3 | 4 |
| beta_lactam__OXA-267                      | 0 | 0 | 0 | 0 | 0 | 0 | 0 | 0 | 1 | 0 | 0 | 0 | 0  | 0  | 0 | 0 | 0 | 0 |
| beta_lactam__OXA-268                      | 0 | 0 | 0 | 1 | 0 | 0 | 0 | 0 | 0 | 0 | 0 | 0 | 0  | 0  | 0 | 0 | 0 | 0 |
| beta_lactam__OXA-270                      | 0 | 0 | 0 | 0 | 0 | 0 | 0 | 1 | 0 | 1 | 1 | 0 | 0  | 3  | 1 | 0 | 1 | 0 |
| beta_lactam__OXA-274                      | 0 | 0 | 0 | 0 | 0 | 0 | 1 | 0 | 0 | 1 | 0 | 0 | 0  | 0  | 0 | 2 | 0 | 1 |
| beta_lactam__OXA-28                       | 1 | 1 | 1 | 0 | 0 | 0 | 0 | 0 | 0 | 0 | 0 | 0 | 0  | 1  | 0 | 0 | 0 | 0 |
| beta_lactam__OXA-280                      | 0 | 0 | 0 | 0 | 0 | 0 | 0 | 0 | 0 | 1 | 0 | 0 | 0  | 0  | 0 | 0 | 0 | 0 |
| beta_lactam__OXA-281                      | 0 | 3 | 1 | 1 | 0 | 0 | 0 | 0 | 0 | 0 | 0 | 0 | 2  | 1  | 1 | 1 | 0 | 3 |
| beta_lactam__OXA-284                      | 0 | 0 | 0 | 0 | 0 | 0 | 0 | 0 | 0 | 1 | 0 | 0 | 0  | 1  | 0 | 0 | 0 | 0 |
| beta_lactam__OXA-3                        | 0 | 0 | 0 | 1 | 1 | 0 | 0 | 0 | 0 | 0 | 0 | 0 | 0  | 0  | 0 | 1 | 1 | 0 |
| beta_lactam__OXA-308                      | 0 | 0 | 0 | 0 | 0 | 0 | 0 | 0 | 0 | 1 | 1 | 0 | 15 | 11 | 0 | 0 | 0 | 1 |
| beta_lactam__OXA-309                      | 0 | 1 | 0 | 0 | 0 | 0 | 0 | 0 | 0 | 0 | 0 | 0 | 1  | 0  | 1 | 1 | 1 | 2 |
| beta_lactam__OXA-330                      | 0 | 0 | 0 | 0 | 0 | 0 | 0 | 2 | 1 | 2 | 0 | 0 | 0  | 0  | 0 | 1 | 0 | 0 |
| beta_lactam__OXA-333                      | 0 | 0 | 0 | 0 | 0 | 0 | 0 | 1 | 0 | 0 | 0 | 0 | 0  | 0  | 0 | 0 | 0 | 0 |
| beta_lactam__OXA-335                      | 0 | 0 | 0 | 0 | 0 | 0 | 0 | 0 | 0 | 0 | 0 | 0 | 0  | 0  | 0 | 0 | 0 | 0 |
| beta_lactam__OXA-350                      | 0 | 0 | 0 | 0 | 0 | 0 | 0 | 0 | 0 | 0 | 0 | 0 | 0  | 0  | 0 | 0 | 1 | 0 |
| beta_lactam__OXA-353                      | 0 | 0 | 0 | 0 | 0 | 0 | 0 | 0 | 0 | 0 | 0 | 0 | 0  | 0  | 0 | 1 | 0 | 0 |
| beta_lactam__OXA-360                      | 0 | 0 | 0 | 1 | 0 | 0 | 0 | 0 | 0 | 0 | 0 | 0 | 0  | 0  | 0 | 0 | 0 | 0 |
| beta_lactam__OXA-384                      | 0 | 0 | 0 | 0 | 0 | 0 | 0 | 0 | 0 | 0 | 0 | 0 | 0  | 0  | 0 | 0 | 0 | 1 |
| beta_lactam__OXA-4                        | 0 | 0 | 0 | 0 | 0 | 0 | 0 | 0 | 0 | 0 | 0 | 0 | 1  | 0  | 0 | 0 | 0 | 0 |
| beta_lactam__OXA-407                      | 0 | 0 | 1 | 0 | 0 | 0 | 0 | 0 | 0 | 0 | 0 | 0 | 0  | 0  | 1 | 0 | 1 | 0 |
| beta_lactam__OXA-417                      | 0 | 0 | 0 | 0 | 0 | 0 | 0 | 0 | 0 | 1 | 0 | 0 | 0  | 0  | 0 | 1 | 1 | 3 |
| beta_lactam__OXA-418                      | 1 | 0 | 0 | 0 | 0 | 0 | 0 | 0 | 0 | 1 | 0 | 0 | 0  | 0  | 0 | 1 | 0 | 0 |
| beta_lactam__OXA-45                       | 0 | 3 | 0 | 1 | 0 | 1 | 0 | 0 | 2 | 1 | 1 | 2 | 0  | 0  | 1 | 0 | 1 | 1 |
| beta_lactam__OXA-46                       | 0 | 0 | 2 | 1 | 0 | 0 | 0 | 0 | 2 | 0 | 1 | 0 | 0  | 0  | 1 | 0 | 0 | 0 |
| beta_lactam__OXA-47                       | 0 | 1 | 0 | 0 | 0 | 1 | 0 | 0 | 0 | 0 | 0 | 0 | 0  | 0  | 0 | 0 | 0 | 0 |
| beta_lactam__OXA-50                       | 0 | 0 | 0 | 0 | 1 | 0 | 0 | 0 | 0 | 0 | 1 | 1 | 0  | 0  | 0 | 0 | 1 | 0 |
| beta_lactam__OXA-56                       | 0 | 1 | 0 | 0 | 0 | 0 | 0 | 0 | 0 | 0 | 0 | 0 | 0  | 0  | 0 | 0 | 0 | 0 |
| beta_lactam__OXA-568                      | 0 | 0 | 2 | 1 | 0 | 0 | 0 | 0 | 0 | 0 | 0 | 0 | 0  | 1  | 0 | 0 | 0 | 0 |
| beta_lactam__OXA-85                       | 0 | 3 | 0 |   |   |   |   |   |   |   |   |   |    |    |   |   |   |   |

|                                               |   |   |   |   |   |   |   |   |   |   |   |   |   |   |   |   |   |   |    |    |   |
|-----------------------------------------------|---|---|---|---|---|---|---|---|---|---|---|---|---|---|---|---|---|---|----|----|---|
| beta_lactam__TEM-135                          | 0 | 0 | 0 | 0 | 0 | 1 | 0 | 0 | 0 | 0 | 0 | 0 | 0 | 0 | 0 | 0 | 0 | 0 | 0  | 0  |   |
| beta_lactam__TEM-15                           | 0 | 0 | 0 | 0 | 0 | 0 | 1 | 0 | 0 | 0 | 0 | 0 | 0 | 0 | 0 | 0 | 0 | 0 | 0  | 0  |   |
| beta_lactam__TEM-167                          | 0 | 0 | 0 | 0 | 0 | 0 | 0 | 0 | 0 | 0 | 0 | 0 | 0 | 0 | 0 | 0 | 0 | 0 | 0  | 0  |   |
| beta_lactam__TEM-178                          | 0 | 0 | 0 | 0 | 0 | 0 | 0 | 0 | 0 | 0 | 0 | 0 | 0 | 0 | 0 | 0 | 0 | 1 | 0  | 0  |   |
| beta_lactam__TEM-187                          | 0 | 0 | 0 | 0 | 0 | 1 | 0 | 0 | 0 | 0 | 0 | 0 | 0 | 0 | 0 | 0 | 0 | 0 | 0  | 0  |   |
| beta_lactam__TEM-192                          | 0 | 1 | 2 | 0 | 2 | 1 | 2 | 0 | 1 | 0 | 0 | 0 | 1 | 0 | 0 | 0 | 0 | 1 | 1  | 0  | 0 |
| beta_lactam__TEM-21                           | 0 | 0 | 0 | 0 | 0 | 0 | 0 | 0 | 1 | 0 | 0 | 0 | 0 | 0 | 0 | 0 | 0 | 0 | 0  | 0  |   |
| beta_lactam__TEM-219                          | 0 | 0 | 1 | 0 | 0 | 0 | 0 | 0 | 0 | 0 | 1 | 0 | 0 | 0 | 0 | 0 | 0 | 1 | 0  | 0  |   |
| beta_lactam__TEM-55                           | 0 | 0 | 0 | 0 | 0 | 0 | 0 | 0 | 0 | 0 | 0 | 0 | 0 | 0 | 0 | 0 | 0 | 0 | 1  | 0  |   |
| beta_lactam__TEM-75                           | 0 | 0 | 0 | 0 | 0 | 1 | 0 | 0 | 1 | 0 | 0 | 0 | 0 | 0 | 0 | 0 | 0 | 0 | 0  | 0  |   |
| beta_lactam__TEM-87                           | 1 | 0 | 0 | 0 | 0 | 0 | 0 | 0 | 0 | 0 | 0 | 0 | 0 | 0 | 0 | 0 | 0 | 1 | 0  | 0  |   |
| beta_lactam__TER-2                            | 0 | 0 | 0 | 0 | 0 | 0 | 0 | 0 | 0 | 0 | 0 | 1 | 0 | 0 | 0 | 1 | 0 | 0 | 0  | 0  |   |
| beta_lactam__TMB-2                            | 2 | 2 | 1 | 1 | 1 | 2 | 3 | 0 | 2 | 0 | 0 | 2 | 0 | 0 | 3 | 1 | 1 | 1 | 10 | 2  | 5 |
| beta_lactam__TRU-1                            | 0 | 0 | 0 | 0 | 0 | 0 | 0 | 0 | 0 | 0 | 0 | 0 | 0 | 0 | 0 | 0 | 0 | 0 | 0  | 2  |   |
| beta_lactam__VEB-1b                           | 0 | 0 | 0 | 1 | 0 | 0 | 0 | 0 | 0 | 0 | 0 | 0 | 0 | 0 | 0 | 1 | 0 | 0 | 0  | 0  |   |
| beta_lactam__VEB-3                            | 2 | 1 | 0 | 1 | 0 | 1 | 0 | 0 | 0 | 1 | 2 | 0 | 0 | 0 | 0 | 2 | 0 | 0 | 0  | 0  |   |
| beta_lactam__VIM-12                           | 0 | 0 | 1 | 0 | 0 | 0 | 0 | 0 | 0 | 0 | 0 | 0 | 0 | 0 | 0 | 0 | 0 | 0 | 0  | 0  |   |
| beta_lactam__VIM-14                           | 0 | 0 | 2 | 0 | 0 | 0 | 0 | 0 | 0 | 0 | 0 | 0 | 0 | 0 | 0 | 0 | 0 | 0 | 0  | 0  |   |
| beta_lactam__VIM-15                           | 0 | 1 | 0 | 0 | 0 | 0 | 0 | 0 | 0 | 0 | 0 | 0 | 0 | 0 | 0 | 0 | 0 | 0 | 0  | 0  |   |
| beta_lactam__VIM-27                           | 1 | 1 | 0 | 1 | 0 | 0 | 0 | 0 | 0 | 0 | 0 | 0 | 0 | 0 | 0 | 0 | 0 | 0 | 0  | 0  |   |
| beta_lactam__VIM-29                           | 0 | 0 | 0 | 1 | 0 | 0 | 0 | 0 | 0 | 0 | 0 | 0 | 0 | 0 | 0 | 1 | 0 | 0 | 0  | 0  |   |
| beta_lactam__VIM-31                           | 0 | 0 | 0 | 1 | 0 | 0 | 0 | 0 | 0 | 0 | 0 | 0 | 0 | 0 | 0 | 1 | 0 | 0 | 0  | 0  |   |
| beta_lactam__VIM-32                           | 0 | 0 | 0 | 1 | 0 | 0 | 1 | 0 | 0 | 0 | 0 | 0 | 0 | 0 | 0 | 0 | 0 | 0 | 0  | 0  |   |
| beta_lactam__VIM-39                           | 0 | 0 | 0 | 1 | 0 | 0 | 0 | 0 | 0 | 0 | 0 | 0 | 0 | 0 | 0 | 0 | 0 | 0 | 0  | 0  |   |
| beta_lactam__vim-48                           | 1 | 0 | 0 | 1 | 0 | 1 | 0 | 0 | 0 | 1 | 1 | 0 | 0 | 0 | 0 | 2 | 0 | 0 | 0  | 0  |   |
| beta_lactam__VIM-6                            | 0 | 0 | 1 | 0 | 0 | 1 | 0 | 0 | 0 | 0 | 0 | 0 | 0 | 0 | 0 | 0 | 0 | 0 | 0  | 0  |   |
| beta_lactam__y56                              | 0 | 1 | 1 | 1 | 1 | 1 | 0 | 0 | 0 | 0 | 1 | 0 | 0 | 0 | 0 | 0 | 0 | 0 | 0  | 0  |   |
| bicyclomycin__bcr-1                           | 0 | 0 | 0 | 0 | 0 | 0 | 0 | 0 | 0 | 0 | 0 | 0 | 0 | 0 | 0 | 0 | 0 | 0 | 0  | 0  |   |
| bleomycin__BLMT                               | 1 | 0 | 0 | 0 | 0 | 0 | 0 | 0 | 0 | 0 | 0 | 0 | 0 | 0 | 0 | 0 | 0 | 0 | 0  | 0  |   |
| chloramphenicol__catB10                       | 0 | 0 | 0 | 1 | 0 | 0 | 0 | 0 | 0 | 0 | 0 | 0 | 0 | 0 | 0 | 0 | 1 | 0 | 1  | 0  |   |
| chloramphenicol__catB11                       | 1 | 1 | 0 | 1 | 0 | 1 | 0 | 0 | 0 | 0 | 2 | 1 | 0 | 0 | 0 | 3 | 1 | 0 | 1  | 0  |   |
| chloramphenicol__catB2                        | 1 | 0 | 1 | 0 | 0 | 0 | 0 | 0 | 1 | 2 | 0 | 0 | 0 | 0 | 0 | 0 | 3 | 1 | 0  | 0  |   |
| chloramphenicol__catB9                        | 0 | 0 | 0 | 1 | 0 | 0 | 0 | 0 | 0 | 0 | 0 | 0 | 0 | 0 | 0 | 0 | 0 | 0 | 0  | 0  |   |
| chloramphenicol__catI                         | 0 | 0 | 0 | 0 | 0 | 0 | 0 | 0 | 0 | 0 | 0 | 0 | 0 | 0 | 0 | 0 | 0 | 0 | 0  | 0  |   |
| chloramphenicol__catII                        | 0 | 0 | 0 | 0 | 0 | 0 | 0 | 0 | 0 | 0 | 0 | 0 | 0 | 0 | 0 | 2 | 0 | 0 | 0  | 3  |   |
| chloramphenicol__catIQ                        | 4 | 0 | 2 | 2 | 0 | 5 | 0 | 0 | 0 | 2 | 2 | 0 | 0 | 0 | 0 | 1 | 0 | 0 | 1  | 7  |   |
| chloramphenicol__cmIA1                        | 0 | 0 | 0 | 0 | 0 | 0 | 1 | 0 | 0 | 1 | 0 | 0 | 0 | 1 | 0 | 1 | 0 | 0 | 1  | 0  |   |
| chloramphenicol__cmIB                         | 0 | 0 | 0 | 0 | 0 | 0 | 0 | 0 | 0 | 0 | 0 | 0 | 0 | 0 | 0 | 0 | 0 | 1 | 0  | 0  |   |
| chloramphenicol__cmIB1                        | 0 | 0 | 1 | 0 | 0 | 0 | 0 | 0 | 0 | 0 | 0 | 0 | 0 | 0 | 0 | 0 | 0 | 2 | 1  | 1  |   |
| chloramphenicol__Pseudomonas aeruginosa catB6 | 0 | 1 | 1 | 0 | 2 | 0 | 0 | 0 | 1 | 0 | 1 | 0 | 0 | 0 | 0 | 1 | 0 | 0 | 0  | 1  |   |
| defensin__Clostridium perfringens mprF        | 0 | 0 | 1 | 0 | 0 | 0 | 0 | 0 | 0 | 0 | 0 | 0 | 0 | 0 | 0 | 0 | 0 | 0 | 1  | 0  |   |
| florfenicol__pp-flo                           | 1 | 0 | 0 | 0 | 0 | 0 | 0 | 0 | 0 | 0 | 0 | 1 | 0 | 0 | 1 | 0 | 0 | 0 | 0  | 1  |   |
| fosfomycin__Acinetobacter baumannii AbaF      | 0 | 0 | 1 | 0 | 0 | 0 | 0 | 0 | 5 | 1 | 3 | 0 | 0 | 0 | 0 | 0 | 3 | 0 | 1  | 1  |   |
| fosfomycin__FosA                              | 0 | 1 | 0 | 1 | 0 | 0 | 0 | 0 | 1 | 1 | 2 | 2 | 3 | 1 | 1 | 0 | 5 | 3 | 2  | 4  |   |
| fosfomycin__FosA3                             | 0 | 0 | 0 | 0 | 0 | 0 | 0 | 0 | 0 | 0 | 0 | 0 | 0 | 0 | 1 | 0 | 0 | 0 | 1  | 1  |   |
| fosfomycin__FosB                              | 1 | 0 | 0 | 1 | 1 | 0 | 0 | 0 | 0 | 0 | 0 | 0 | 0 | 0 | 0 | 0 | 0 | 0 | 0  | 1  |   |
| fosfomycin__FosL1                             | 0 | 0 | 0 | 0 | 0 | 0 | 0 | 0 | 0 | 0 | 0 | 0 | 0 | 0 | 0 | 1 | 0 | 0 | 0  | 0  |   |
| macrolide-lincosamide-streptogramin__cfr(A)   | 1 | 0 | 0 | 0 | 0 | 0 | 0 | 0 | 0 | 0 | 0 | 0 | 0 | 0 | 0 | 0 | 0 | 0 | 0  | 0  |   |
| macrolide-lincosamide-streptogramin__erm(39)  | 0 | 0 | 0 | 0 | 1 | 0 | 0 | 0 | 0 | 0 | 0 | 0 | 0 | 0 | 0 | 0 | 0 | 0 | 0  | 0  |   |
| macrolide-lincosamide-streptogramin__erm(46)  | 0 | 0 | 0 | 0 | 0 | 0 | 0 | 0 | 0 | 0 | 0 | 0 | 0 | 0 | 0 | 0 | 0 | 0 | 0  | 1  |   |
| macrolide-lincosamide-streptogramin__erm(49)  | 0 | 0 | 0 | 1 | 0 | 0 | 0 | 0 | 0 | 0 | 0 | 0 | 0 | 0 | 0 | 0 | 0 | 0 | 0  | 0  |   |
| macrolide-lincosamide-streptogramin__erm(50)  | 2 | 0 | 0 | 0 | 1 | 0 | 0 | 0 | 0 | 0 | 0 | 0 | 0 | 1 | 0 | 0 | 0 | 2 | 0  | 4  |   |
| macrolide-lincosamide-streptogramin__erm(C)   | 0 | 0 | 1 | 0 | 0 | 0 | 1 | 0 | 0 | 0 | 0 | 0 | 0 | 0 | 0 | 0 | 0 | 0 | 0  | 0  |   |
| macrolide-lincosamide-streptogramin__lnrB     | 0 | 0 | 2 | 0 | 0 | 0 | 0 | 0 | 1 | 0 | 3 | 0 | 0 | 0 | 0 | 1 | 0 | 0 | 1  | 1  |   |
| macrolide-lincosamide-streptogramin__lnrD     | 1 | 1 | 0 | 0 | 0 | 0 | 2 | 0 | 0 | 0 | 2 | 0 | 0 | 0 | 0 | 1 | 0 | 0 | 1  | 0  |   |
| macrolide-lincosamide-streptogramin__lnu(A)   | 0 | 0 | 0 | 0 | 1 | 0 | 0 | 0 | 0 | 0 | 0 | 1 | 0 | 0 | 0 | 0 | 0 | 0 | 0  | 0  |   |
| macrolide-lincosamide-streptogramin__lnu(P)   | 0 | 0 | 0 | 1 | 0 | 0 | 0 | 0 | 0 | 0 | 0 | 0 | 0 | 0 | 0 | 0 | 0 | 0 | 0  | 0  |   |
| macrolide-lincosamide-streptogramin__mef(E)   | 2 | 0 | 0 | 0 | 0 | 0 | 1 | 0 | 0 | 0 | 0 | 0 | 0 | 0 | 0 | 1 | 0 | 0 | 0  | 0  |   |
| macrolide-lincosamide-streptogramin__mph(F)   | 1 | 0 | 1 | 0 | 0 | 1 | 0 | 0 | 0 | 0 | 1 | 0 | 0 | 0 | 3 | 0 | 0 | 1 | 0  | 0  |   |
| macrolide-lincosamide-streptogramin__msr(A)   | 0 | 0 | 0 | 0 | 0 | 0 | 0 | 0 | 0 | 0 | 0 | 0 | 0 | 0 | 1 | 0 | 0 | 0 | 0  | 0  |   |
| macrolide-lincosamide-streptogramin__optrA    | 2 | 2 | 0 | 0 | 1 | 0 | 0 | 0 | 0 | 1 | 0 | 0 | 0 | 1 | 2 | 0 | 0 | 0 | 0  | 0  |   |
| macrolide-lincosamide-streptogramin__poxtA    | 1 | 0 | 0 | 0 | 0 | 0 | 0 | 0 | 0 | 0 | 0 | 0 | 0 | 0 | 3 | 0 | 0 | 0 | 0  | 0  |   |
| macrolide-lincosamide-streptogramin__vat(E)   | 0 | 0 | 0 | 0 | 0 | 0 | 0 | 0 | 0 | 0 | 0 | 0 | 0 | 0 | 0 | 0 | 0 | 0 | 0  | 0  |   |
| macrolide-lincosamide-streptogramin__vat(H)   | 0 | 0 | 0 | 1 | 0 | 0 | 0 | 0 | 0 | 0 | 0 | 0 | 0 | 0 | 0 | 0 | 0 | 0 | 0  | 0  |   |
| macrolide-lincosamide-streptogramin__vmIR     | 2 | 0 | 1 | 1 | 1 | 0 | 0 | 0 | 3 | 1 | 0 | 1 | 0 | 1 | 0 | 0 | 0 | 0 | 1  | 0  |   |
| multidrug__abcA                               | 0 | 0 | 0 | 0 | 0 | 0 | 0 | 0 | 0 | 0 | 0 | 0 | 0 | 0 | 0 | 0 | 0 | 0 | 0  | 0  |   |
| multidrug__Acinetobacter baumannii AmvA       | 0 | 0 | 0 | 0 | 0 | 2 | 0 | 0 | 0 | 0 | 1 | 0 | 0 | 0 | 0 | 1 | 0 | 1 | 5  | 15 |   |
| multidrug__adeH                               | 1 | 0 | 0 | 0 | 0 | 0 | 1 | 0 | 1 | 1 | 0 | 0 | 0 | 0 | 0 | 0 | 1 | 2 | 3  | 4  |   |
| multidrug__bdt                                | 0 | 0 | 0 | 1 | 1 | 0 | 1 | 0 | 0 | 1 | 1 | 2 | 0 | 0 | 0 | 1 | 0 | 0 | 1  | 2  |   |
| multidrug__bpeF                               | 0 | 1 | 1 | 0 | 0 | 0 | 0 | 0 | 0 | 1 | 1 | 1 | 0 | 0 | 1 | 0 | 0 | 1 | 1  | 1  |   |
| multidrug__cdeA                               | 0 | 0 | 1 | 0 | 0 | 0 | 0 | 0 | 0 | 0 | 0 | 0 | 0 | 0 | 0 | 0 | 0 | 0 | 0  | 0  |   |
| multidrug__efnA                               | 1 | 0 | 1 | 0 | 1 | 6 | 1 | 0 | 0 | 0 | 0 | 0 | 0 | 0 | 3 | 0 | 0 | 0 | 2  | 0  |   |
| multidrug__efpA                               | 1 | 1 | 0 | 0 | 0 | 0 | 1 | 0 | 0 | 0 | 0 | 0 | 0 | 0 | 0 | 0 | 0 | 0 | 0  | 0  |   |
| multidrug__lnuP                               | 0 | 0 | 0 | 0 | 0 | 1 | 0 | 0 | 0 | 0 | 0 | 0 | 0 | 0 | 0 | 0 | 0 | 0 | 0  | 0  |   |
| multidrug__mdeA                               | 0 | 0 | 1 | 0 | 2 | 0 | 1 | 0 | 0 | 0 | 1 | 0 | 0 | 0 | 0 | 0 | 0 | 1 | 1  | 0  |   |
| multidrug__mdsA                               | 0 | 0 | 0 | 1 | 0 | 0 | 0 | 0 | 0 | 0 | 0 | 0 | 0 | 0 | 0 | 0 | 0 | 0 | 0  | 0  |   |
| multidrug__mepA                               | 0 | 0 | 0 | 0 | 0 | 0 | 0 | 0 | 0 | 0 | 1 | 0 | 0 | 0 | 0 | 0 | 0 | 0 | 0  | 0  |   |
| multidrug__mexG                               | 0 | 0 | 0 | 0 | 0 | 0 | 0 | 0 | 0 | 0 | 0 | 0 | 0 | 0 | 0 | 0 | 0 | 0 | 0  | 0  |   |
| multidrug__mexH                               | 0 | 0 | 0 | 0 | 0 | 0 | 0 | 0 | 0 | 0 | 0 | 0 | 0 | 0 | 0 | 0 | 0 | 0 | 0  | 0  |   |
| multidrug__mexM                               | 0 | 0 | 0 | 0 | 0 | 0 | 0 | 0 | 0 | 0 | 0 | 0 | 0 | 0 | 0 | 0 | 0 | 0 | 0  | 0  |   |
| multidrug__mexV                               | 0 | 0 | 0 | 0 | 0 | 0 | 0 | 0 | 0 | 0 | 0 | 0 | 0 | 0 | 0 | 0 | 0 | 0 | 0  | 0  |   |
| multidrug__mtrC                               | 0 | 0 | 0 | 0 | 0 | 0 | 0 | 0 | 0 | 0 | 0 | 0 | 0 | 0 | 0 | 0 | 0 | 0 | 0  | 0  |   |
| multidrug__mttE                               | 0 | 0 | 0 | 0 | 0 | 0 | 0 | 0 | 0 | 0 | 0 | 0 | 0 | 0 | 0 | 0 | 0 | 0 | 0  | 0  |   |
| multidrug__opcM                               | 0 | 0 | 0 | 0 | 0 | 0 | 0 | 0 | 0 | 0 | 0 | 0 | 0 | 0 | 0 | 0 | 0 | 0 | 0  | 0  |   |
| multidrug__opnD                               | 0 | 0 | 0 | 0 | 0 | 0 | 0 | 0 | 0 | 0 | 0 | 0 | 0 | 0 | 0 | 0 | 0 | 0 | 0  | 0  |   |
| multidrug__opmE                               | 0 | 0 | 0 | 0 | 0 | 0 | 0 | 0 | 0 | 0 | 0 | 0 | 0 | 0 | 0 | 0 | 0 | 0 | 0  | 0  |   |
| multidrug__oprA                               | 0 | 1 | 0 | 0 | 0 | 0 | 0 | 0 | 1 | 0 | 0 | 0 | 0 | 0 | 0 | 0 | 0 | 0 | 1  | 0  |   |
| multidrug__OprJ                               | 1 | 0 | 0 | 0 | 0 | 0 | 0 | 0 | 0 | 1 | 1 | 1 | 0 | 1 | 0 | 0 | 1 | 2 | 1  | 1  |   |
| multidrug__OprN                               | 0 |   |   |   |   |   |   |   |   |   |   |   |   |   |   |   |   |   |    |    |   |

[illegible]
