# Supplementary material for: Performance of a Pilot-Scale Continuous Flow Ozone-Based Hospital Wastewater Treatment System
Source: MDPI journal article supplement (doi:10.3390/antibiotics12050932), 2023-05-19
Supplement: s1 [file s1]

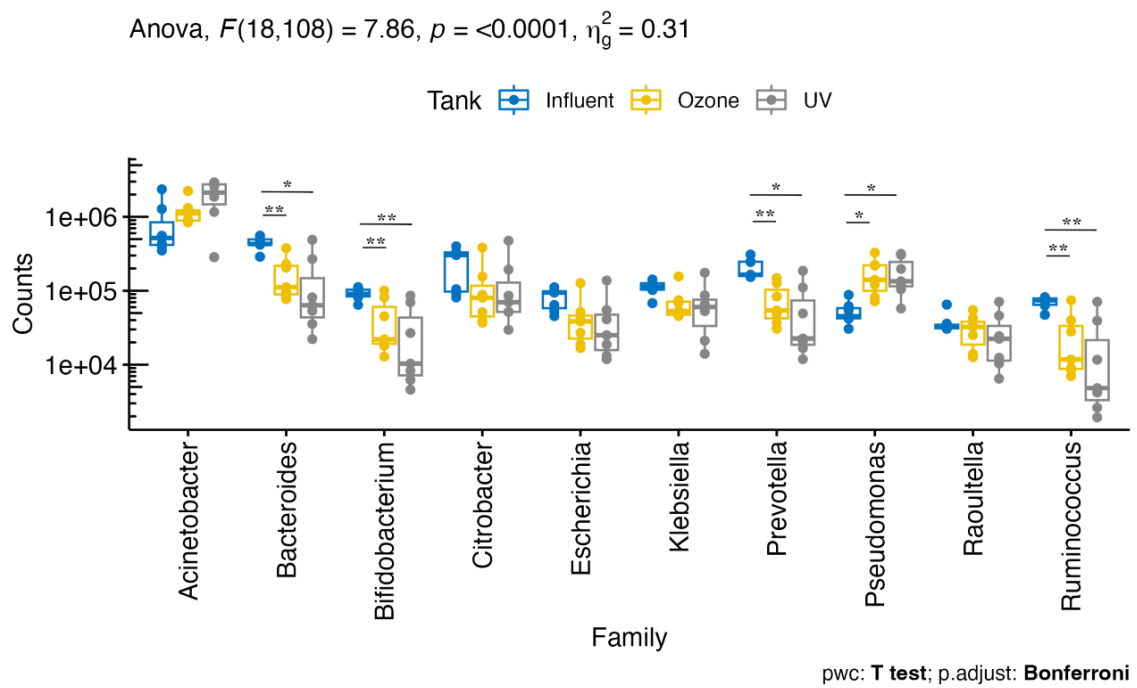

**Figure S2.** Two-way repeated ANOVA of each bacterial family based on the effect of ozone and subsequent UV treatment on the wastewater (adjusted  $p$ -value  $< 0.05$ , two-way repeated ANOVA and pairwise  $t$ -test).
