# Supplementary material for: Performance of a Pilot-Scale Continuous Flow Ozone-Based Hospital Wastewater Treatment System
Source: MDPI journal article supplement (doi:10.3390/antibiotics12050932), 2023-05-19
Supplement: s1 [file s1]

Table S4. Detected counts of sequencing reads for species of *Acinetobacter* or *Pseudomonas* species using metagenomic DNA-Seq analysis

| Days (post treatment)                                           | Original storage tank (Influent) |            |            |            |            |            |            |            |            |            | Wastewater treatment tank 1 (ozone) |            |            |            |            |            |            |            |            |            | Wastewater treatment tank 2 (UV-LED) |  |  |  |  |  |  |  |  |  |
|-----------------------------------------------------------------|----------------------------------|------------|------------|------------|------------|------------|------------|------------|------------|------------|-------------------------------------|------------|------------|------------|------------|------------|------------|------------|------------|------------|--------------------------------------|--|--|--|--|--|--|--|--|--|
|                                                                 | 0                                | 1          | 4          | 6          | 8          | 15         | 28         | 0          | 1          | 4          | 6                                   | 8          | 15         | 28         | 0          | 1          | 4          | 6          | 8          | 15         | 28                                   |  |  |  |  |  |  |  |  |  |
| Date (yyyy/mm/dd)                                               | 2022/11/04                       | 2022/11/05 | 2022/11/08 | 2022/11/08 | 2022/11/08 | 2022/11/08 | 2022/11/08 | 2022/11/04 | 2022/11/05 | 2022/11/08 | 2022/11/08                          | 2022/11/08 | 2022/11/08 | 2022/11/08 | 2022/11/04 | 2022/11/05 | 2022/11/08 | 2022/11/08 | 2022/11/08 | 2022/11/08 | 2022/11/08                           |  |  |  |  |  |  |  |  |  |
| DNA conc. (ng/L)                                                | 0.5                              | 1.1        | 0.7        | 1.2        | 0.6        | 0.7        | 0.8        | 1.3        | 0.2        | 0.4        | 0.9                                 | 0.4        | 0.5        | 0.5        | 1.4        | 0.3        | 0.5        | 0.5        | 0.8        | 0.6        | 0.7                                  |  |  |  |  |  |  |  |  |  |
| Metagenomic DNA-Seq (total reads)                               | 11,562,484                       | 9,522,700  | 10,930,972 | 14,612,202 | 8,286,906  | 7,894,732  | 9,196,754  | 13,422,972 | 4,136,692  | 3,915,464  | 6,300,318                           | 4,652,896  | 3,947,254  | 3,882,996  | 16,972,696 | 1,278,814  | 3,510,890  | 60,740,408 | 9,225,536  | 7,333,522  | 4,123,884                            |  |  |  |  |  |  |  |  |  |
| Bacteria species for <i>Acinetobacter</i> or <i>Pseudomonas</i> |                                  |            |            |            |            |            |            |            |            |            |                                     |            |            |            |            |            |            |            |            |            |                                      |  |  |  |  |  |  |  |  |  |
| <i>Acinetobacter baylii</i>                                     | 24                               | 92         | 50         | 142        | 31         | 40         | 42         | 95         | 41         | 99         | 124                                 | 113        | 201        | 150        | 127        | 16         | 141        | 286        | 249        | 341        | 180                                  |  |  |  |  |  |  |  |  |  |
| <i>Acinetobacter baumannii</i> A424                             | 9                                | 9          | 3          | 13         | 1          | 2          | 3          | 12         | 2          | 1          | 1                                   | 5          | 1          | 0          | 1          | 12         | 1          | 0          | 1          | 2          | 1                                    |  |  |  |  |  |  |  |  |  |
| <i>Acinetobacter baumannii</i> ATCC 17978                       | 1,286                            | 3,622      | 1,720      | 5,987      | 955        | 1,303      | 1,152      | 2,812      | 1,116      | 828        | 2,548                               | 1,052      | 1,723      | 1,212      | 4,324      | 454        | 1,032      | 3,239      | 2,864      | 4,793      | 2,070                                |  |  |  |  |  |  |  |  |  |
| <i>Acinetobacter baumannii</i> BJAB0868                         | 13                               | 8          | 6          | 7          | 3          | 0          | 1          | 10         | 1          | 0          | 2                                   | 1          | 0          | 0          | 0          | 10         | 0          | 1          | 0          | 2          | 1                                    |  |  |  |  |  |  |  |  |  |
| <i>Acinetobacter baumannii</i> SDF                              | 121                              | 150        | 89         | 272        | 57         | 69         | 174        | 557        | 151        | 400        | 361                                 | 87         | 98         | 238        | 1,286      | 83         | 234        | 618        | 308        | 502        | 500                                  |  |  |  |  |  |  |  |  |  |
| <i>Acinetobacter lwoffii</i>                                    | 57                               | 243        | 168        | 449        | 121        | 217        | 65         | 195        | 184        | 155        | 384                                 | 402        | 495        | 173        | 263        | 40         | 252        | 996        | 2,202      | 2,280      | 359                                  |  |  |  |  |  |  |  |  |  |
| <i>Acinetobacter nosocomialis</i> M2                            | 5                                | 19         | 17         | 43         | 8          | 9          | 6          | 17         | 10         | 2          | 15                                  | 10         | 25         | 9          | 31         | 2          | 7          | 47         | 32         | 49         | 12                                   |  |  |  |  |  |  |  |  |  |
| <i>Acinetobacter solis</i>                                      | 1,167                            | 2,233      | 906        | 2,761      | 513        | 693        | 1,019      | 3,837      | 1,687      | 2,219      | 2,850                               | 641        | 1,516      | 1,053      | 7,461      | 515        | 1,251      | 3,658      | 1,665      | 3,869      | 3,004                                |  |  |  |  |  |  |  |  |  |
| <i>Acinetobacter chinensis</i>                                  | 1,196                            | 3,031      | 1,227      | 4,305      | 550        | 665        | 880        | 4,291      | 3,472      | 3,356      | 3,787                               | 1,007      | 1,342      | 1,371      | 8,033      | 824        | 1,762      | 4,174      | 2,174      | 4,229      | 3,822                                |  |  |  |  |  |  |  |  |  |
| <i>Acinetobacter collinisensistens</i>                          | 114                              | 371        | 242        | 609        | 103        | 303        | 721        | 334        | 175        | 158        | 403                                 | 151        | 583        | 1,194      | 510        | 91         | 500        | 1,540      | 1,096      | 1,919      | 2,613                                |  |  |  |  |  |  |  |  |  |
| <i>Acinetobacter cumulans</i>                                   | 34,413                           | 6,706      | 5,310      | 7,727      | 2,078      | 4,035      | 3,134      | 22,091     | 39,103     | 9,096      | 172,891                             | 3,678      | 4,961      | 4,358      | 52,195     | 4,375      | 13,372     | 29,269     | 9,715      | 28,100     | 9,113                                |  |  |  |  |  |  |  |  |  |
| <i>Acinetobacter defluvis</i>                                   | 1,009                            | 1,426      | 1,190      | 1,941      | 536        | 950        | 1,435      | 2,658      | 2,745      | 3,000      | 3,991                               | 1,584      | 3,055      | 2,950      | 5,791      | 654        | 2,862      | 7,350      | 5,692      | 7,910      | 5,757                                |  |  |  |  |  |  |  |  |  |
| <i>Acinetobacter dispersus</i>                                  | 115                              | 451        | 321        | 867        | 145        | 205        | 232        | 283        | 267        | 376        | 900                                 | 335        | 690        | 388        | 516        | 103        | 960        | 2,539      | 1,282      | 1,249      | 603                                  |  |  |  |  |  |  |  |  |  |
| <i>Acinetobacter equi</i>                                       | 23                               | 94         | 59         | 185        | 44         | 107        | 110        | 54         | 100        | 339        | 1,053                               | 518        | 1,246      | 638        | 82         | 39         | 695        | 1,215      | 1,230      | 1,686      | 1,306                                |  |  |  |  |  |  |  |  |  |
| <i>Acinetobacter haemolyticus</i>                               | 8,103                            | 27,865     | 11,468     | 58,984     | 7,107      | 9,847      | 14,592     | 30,447     | 10,817     | 10,415     | 28,522                              | 5,848      | 11,837     | 10,343     | 50,925     | 6,182      | 20,008     | 63,847     | 58,141     | 60,222     | 74,868                               |  |  |  |  |  |  |  |  |  |
| <i>Acinetobacter indus</i>                                      | 3,804                            | 15,490     | 4,363      | 26,301     | 2,865      | 3,363      | 4,048      | 16,743     | 4,933      | 4,219      | 14,151                              | 4,027      | 8,863      | 6,334      | 22,891     | 2,202      | 5,525      | 16,280     | 12,177     | 16,860     | 16,473                               |  |  |  |  |  |  |  |  |  |
| <i>Acinetobacter johnsonii</i> XBB1                             | 296                              | 633        | 465        | 788        | 257        | 538        | 780        | 655        | 831        | 802        | 1,075                               | 518        | 1,090      | 1,052      | 1,023      | 245        | 686        | 1,283      | 1,281      | 337        | 1,889                                |  |  |  |  |  |  |  |  |  |
| <i>Acinetobacter junii</i>                                      | 79,306                           | 367,339    | 105,985    | 686,030    | 94,281     | 73,300     | 53,194     | 268,358    | 90,976     | 132,692    | 164,239                             | 28,022     | 35,072     | 18,680     | 469,549    | 56,639     | 16,682     | 100,924    | 62,157     | 29,767     | 27,043                               |  |  |  |  |  |  |  |  |  |
| <i>Acinetobacter lantii</i>                                     | 123                              | 558        | 316        | 1,040      | 154        | 182        | 252        | 351        | 280        | 754        | 1,967                               | 976        | 1,664      | 1,098      | 625        | 107        | 1,360      | 2,922      | 2,438      | 2,310      | 2,268                                |  |  |  |  |  |  |  |  |  |
| <i>Acinetobacter larvae</i>                                     | 48                               | 147        | 63         | 178        | 25         | 103        | 52         | 128        | 62         | 36         | 120                                 | 69         | 277        | 90         | 156        | 10         | 69         | 187        | 208        | 417        | 182                                  |  |  |  |  |  |  |  |  |  |
| <i>Acinetobacter piscicola</i>                                  | 570                              | 868        | 1,006      | 1,574      | 386        | 572        | 817        | 1,065      | 1,756      | 2,938      | 4,494                               | 2,295      | 3,626      | 2,707      | 2,309      | 365        | 3,532      | 8,316      | 6,021      | 7,039      | 5,055                                |  |  |  |  |  |  |  |  |  |
| <i>Acinetobacter portorii</i>                                   | 127                              | 342        | 177        | 459        | 93         | 155        | 283        | 299        | 248        | 271        | 545                                 | 197        | 720        | 406        | 516        | 74         | 313        | 1,072      | 788        | 1,698      | 1,226                                |  |  |  |  |  |  |  |  |  |
| <i>Acinetobacter proteolyticus</i>                              | 8                                | 2          | 3          | 4          | 1          | 5          | 1          | 13         | 20         | 15         | 9                                   | 2          | 0          | 0          | 30         | 4          | 5          | 4          | 6          | 2          | 2                                    |  |  |  |  |  |  |  |  |  |
| <i>Acinetobacter pseudoflavus</i>                               | 328                              | 567        | 331        | 779        | 149        | 194        | 320        | 1,105      | 463        | 852        | 1,745                               | 490        | 654        | 656        | 2,262      | 173        | 763        | 1,887      | 1,281      | 1,486      | 1,635                                |  |  |  |  |  |  |  |  |  |
| <i>Acinetobacter radiotolerans</i> DSM 6976 + NBRC 10241        | 128                              | 216        | 160        | 437        | 107        | 189        | 133        | 293        | 324        | 540        | 634                                 | 317        | 519        | 246        | 623        | 96         | 518        | 1,767      | 1,381      | 909        | 593                                  |  |  |  |  |  |  |  |  |  |
| <i>Acinetobacter ruginigena</i>                                 | 5                                | 42         | 20         | 12         | 4          | 15         | 23         | 13         | 22         | 13         | 15                                  | 13         | 9          | 1          | 19         | 15         | 7          | 19         | 82         | 78         | 28                                   |  |  |  |  |  |  |  |  |  |
| <i>Acinetobacter ruddii</i>                                     | 8                                | 2          | 1          | 12         | 0          | 1          | 3          | 10         | 3          | 3          | 4                                   | 2          | 2          | 1          | 5          | 1          | 5          | 2          | 2          | 2          | 2                                    |  |  |  |  |  |  |  |  |  |
| <i>Acinetobacter schindleri</i>                                 | 2,855                            | 11,733     | 3,435      | 19,448     | 2,206      | 2,759      | 3,604      | 11,682     | 3,492      | 5,147      | 14,444                              | 5,655      | 8,020      | 6,682      | 18,329     | 1,591      | 6,464      | 15,773     | 14,298     | 14,174     | 12,712                               |  |  |  |  |  |  |  |  |  |
| <i>Acinetobacter septicus</i>                                   | 99                               | 350        | 231        | 541        | 119        | 188        | 243        | 226        | 174        | 280        | 729                                 | 346        | 729        | 498        | 432        | 75         | 461        | 1,233      | 794        | 1,316      | 1,446                                |  |  |  |  |  |  |  |  |  |
| <i>Acinetobacter shoenleii</i>                                  | 145                              | 383        | 297        | 671        | 95         | 223        | 215        | 323        | 328        | 722        | 1,736                               | 884        | 1,679      | 950        | 620        | 105        | 1,126      | 2,182      | 2,162      | 2,382      | 2,310                                |  |  |  |  |  |  |  |  |  |
| <i>Acinetobacter soli</i>                                       | 246                              | 607        | 236        | 1,034      | 189        | 155        | 202        | 634        | 241        | 194        | 885                                 | 142        | 254        | 278        | 1,157      | 110        | 274        | 675        | 478        | 604        | 583                                  |  |  |  |  |  |  |  |  |  |
| <i>Acinetobacter townii</i>                                     | 2,105                            | 7,005      | 3,049      | 11,406     | 1,743      | 2,169      | 2,686      | 5,699      | 3,961      | 3,851      | 6,896                               | 1,869      | 2,445      | 1,753      | 10,347     | 1,504      | 2,761      | 13,095     | 4,695      | 5,773      | 4,760                                |  |  |  |  |  |  |  |  |  |
| <i>Acinetobacter ursingii</i>                                   | 1,626                            | 3,538      | 1,833      | 5,800      | 1,173      | 1,446      | 1,567      | 3,604      | 1,865      | 1,494      | 4,194                               | 1,628      | 2,806      | 2,209      | 5,584      | 734        | 2,694      | 6,476      | 5,389      | 5,717      | 5,304                                |  |  |  |  |  |  |  |  |  |
| <i>Acinetobacter variabilis</i>                                 | 844                              | 2,506      | 998        | 5,090      | 813        | 725        | 736        | 2,520      | 972        | 688        | 2,725                               | 778        | 1,201      | 885        | 4,841      | 511        | 960        | 3,169      | 1,683      | 2,098      | 1,695                                |  |  |  |  |  |  |  |  |  |
| <i>Acinetobacter venetianus</i>                                 | 769                              | 3,828      | 996        | 6,260      | 653        | 599        | 517        | 3,730      | 689        | 287        | 1,456                               | 363        | 500        | 266        | 5,250      | 457        | 614        | 2,039      | 979        | 1,011      | 416                                  |  |  |  |  |  |  |  |  |  |
| <i>Acinetobacter vivianii</i>                                   | 55                               | 156        | 143        | 250        | 60         | 96         | 109        | 163        | 112        | 152        | 316                                 | 93         | 205        | 87         | 212        | 58         | 374        | 946        | 1,411      | 486        | 115                                  |  |  |  |  |  |  |  |  |  |
| <i>Acinetobacter wanghuai</i>                                   | 44                               | 127        | 116        | 173        | 49         | 80         | 108        | 67         | 96         | 172        | 297                                 | 128        | 428        | 237        | 173        | 29         | 607        | 501        | 565        | 995        | 605                                  |  |  |  |  |  |  |  |  |  |
| <i>Acinetobacter wuhanensis</i>                                 | 73,560                           | 57,987     | 65,369     | 49,758     | 16,222     | 13,864     | 16,719     | 143,681    | 358,413    | 324,929    | 230,801                             | 46,406     | 16,269     | 11,077     | 408,642    | 58,224     | 122,116    | 217,158    | 81,565     | 153,399    | 25,135                               |  |  |  |  |  |  |  |  |  |
| <i>Acinetobacter</i> sp. 10FS3-1                                | 3,377                            | 6,415      | 2,542      | 9,386      | 1,471      | 2,162      | 3,339      | 9,349      | 3,129      | 3,576      | 7,241                               | 1,714      | 2,614      | 3,465      | 17,078     | 1,184      | 2,934      | 10,767     | 6,121      | 10,532     | 7,799                                |  |  |  |  |  |  |  |  |  |
| <i>Acinetobacter</i> sp. Ac-14                                  | 6                                | 16         | 14         | 15         | 11         | 16         | 5          | 11         | 15         | 6          | 20                                  | 29         | 4          | 6          | 27         | 3          | 29         | 91         | 71         | 71         | 9                                    |  |  |  |  |  |  |  |  |  |
| <i>Acinetobacter</i> sp. ACN181                                 | 68                               | 148        | 102        | 336        | 61         | 85         | 106        | 169        | 139        | 145        | 421                                 | 100        | 276        | 161        | 322        | 42         | 507        | 912        | 422        | 619        | 441                                  |  |  |  |  |  |  |  |  |  |
| <i>Acinetobacter</i> sp. ACN262                                 | 2,249                            | 8,834      | 3,146      | 17,073     | 2,518      | 2,723      | 2,789      | 7,183      | 2,985      | 2,246      | 8,778                               | 3,380      | 5,733      | 4,345      | 12,246     | 1,659      | 3,976      | 18,921     | 11,963     | 23,132     | 11,155                               |  |  |  |  |  |  |  |  |  |
| <i>Acinetobacter</i> sp. AP47                                   | 10                               | 24         | 14         | 67         | 6          | 11         | 4          | 19         | 6          | 0          | 8                                   | 2          | 0          | 0          | 29         | 3          | 3          | 7          | 2          | 4          | 2                                    |  |  |  |  |  |  |  |  |  |
| <i>Acinetobacter</i> sp. ASP199                                 | 69                               | 135        | 64         | 208        | 49         | 69         | 82         | 116        | 197        | 134        | 223                                 | 44         | 157        | 108        | 286        | 49         | 110        | 317        | 213        | 486        | 404                                  |  |  |  |  |  |  |  |  |  |
| <i>Acinetobacter</i> sp. BEC1-S18-ESBL-01                       | 13                               | 43         | 20         | 73         | 26         | 16         | 8          | 41         | 21         | 24         | 23                                  | 10         | 18         | 5          | 59         | 8          | 32         | 104        | 113        | 119        | 7                                    |  |  |  |  |  |  |  |  |  |
| <i>Acinetobacter</i> sp. BH54                                   | 22                               | 31         | 23         | 84         | 8          | 20         | 10         | 71         | 144        | 108        | 62                                  | 56         |            |            |            |            |            |            |            |            |                                      |  |  |  |  |  |  |  |  |  |

|                                                              |       |     |       |       |     |     |     |       |        |        |        |        |       |       |       |        |       |        |        |       |       |
|--------------------------------------------------------------|-------|-----|-------|-------|-----|-----|-----|-------|--------|--------|--------|--------|-------|-------|-------|--------|-------|--------|--------|-------|-------|
| <i>Pseudomonas wadsworthensis</i>                            | 7     | 18  | 66    | 187   | 36  | 58  | 58  | 45    | 139    | 415    | 2,446  | 934    | 1,084 | 839   | 96    | 18     | 518   | 1,201  | 1,597  | 686   | 1,277 |
| <i>Pseudomonas gingivalis</i>                                | 11    | 13  | 18    | 79    | 16  | 31  | 38  | 19    | 86     | 230    | 1,247  | 487    | 478   | 383   | 45    | 20     | 284   | 628    | 808    | 338   | 624   |
| <i>Pseudomonas aeruginosa</i>                                | 23    | 29  | 116   | 29    | 30  | 35  | 19  | 54    | 21     | 40     | 43     | 32     | 21    | 26    | 91    | 17     | 37    | 56     | 24     | 38    | 43    |
| <i>Pseudomonas selesnickii</i>                               | 9     | 14  | 54    | 16    | 9   | 15  | 14  | 15    | 12     | 21     | 55     | 26     | 30    | 21    | 27    | 2      | 22    | 50     | 45     | 23    | 49    |
| <i>Pseudomonas stutzeri</i>                                  | 25    | 42  | 73    | 249   | 38  | 44  | 28  | 173   | 1,709  | 3,251  | 2,397  | 1,764  | 596   | 215   | 244   | 530    | 1,166 | 1,350  | 1,541  | 467   | 333   |
| <i>Pseudomonas silvestris</i>                                | 47    | 60  | 250   | 55    | 56  | 81  | 53  | 51    | 53     | 99     | 78     | 68     | 35    | 64    | 111   | 25     | 65    | 87     | 81     | 67    | 78    |
| <i>Pseudomonas balerica</i> DSM 6883                         | 57    | 46  | 88    | 69    | 42  | 73  | 57  | 59    | 44     | 39     | 35     | 30     | 32    | 32    | 135   | 12     | 35    | 99     | 38     | 118   | 56    |
| <i>Pseudomonas luteola</i>                                   | 1     | 1   | 3     | 41    | 23  | 6   | 3   | 11    | 10     | 193    | 151    | 170    | 89    | 36    | 18    | 21     | 37    | 254    | 190    | 155   | 61    |
| <i>Pseudomonas stutzeri</i> CCUG 29243                       | 16    | 20  | 27    | 11    | 9   | 13  | 6   | 21    | 8      | 13     | 10     | 10     | 7     | 10    | 23    | 4      | 13    | 20     | 8      | 16    | 12    |
| <i>Pseudomonas stutzeri</i> DSM 10781                        | 22    | 40  | 125   | 41    | 38  | 29  | 27  | 54    | 20     | 55     | 39     | 46     | 24    | 15    | 64    | 6      | 43    | 49     | 48     | 54    | 48    |
| <i>Pseudomonas stutzeri</i> RCH2                             | 11    | 12  | 55    | 7     | 9   | 14  | 8   | 13    | 8      | 23     | 9      | 19     | 13    | 7     | 18    | 6      | 12    | 24     | 14     | 12    | 24    |
| <i>Pseudomonas syringae</i> pv. <i>maulicola</i> str. ES4326 | 5     | 4   | 6     | 7     | 2   | 5   | 3   | 11    | 9      | 6      | 30     | 16     | 12    | 15    | 13    | 0      | 5     | 14     | 24     | 7     | 20    |
| <i>Pseudomonas syringae</i> pv. <i>tomato</i>                | 207   | 151 | 209   | 375   | 77  | 169 | 128 | 425   | 59     | 159    | 442    | 211    | 226   | 212   | 689   | 42     | 280   | 884    | 364    | 629   | 260   |
| <i>Pseudomonas thivervalensis</i>                            | 12    | 13  | 14    | 23    | 11  | 8   | 9   | 21    | 16     | 27     | 133    | 54     | 40    | 34    | 26    | 4      | 41    | 65     | 94     | 49    | 89    |
| <i>Pseudomonas tolosensis</i>                                | 381   | 618 | 772   | 929   | 381 | 473 | 386 | 869   | 2,201  | 1,055  | 1,827  | 1,033  | 765   | 449   | 963   | 325    | 1,622 | 2,127  | 2,148  | 975   | 785   |
| <i>Pseudomonas tobiensis</i>                                 | 15    | 45  | 63    | 32    | 17  | 30  | 25  | 29    | 21     | 38     | 56     | 27     | 29    | 29    | 48    | 11     | 28    | 77     | 41     | 51    | 32    |
| <i>Pseudomonas frustae</i>                                   | 3     | 19  | 50    | 156   | 28  | 69  | 74  | 39    | 102    | 400    | 2,130  | 914    | 882   | 699   | 83    | 20     | 444   | 1,085  | 1,374  | 555   | 1,126 |
| <i>Pseudomonas umsongensis</i>                               | 32    | 21  | 29    | 36    | 11  | 8   | 8   | 27    | 36     | 44     | 142    | 65     | 82    | 56    | 38    | 3      | 48    | 54     | 125    | 55    | 82    |
| <i>Pseudomonas vacuoverensis</i>                             | 3     | 4   | 7     | 24    | 5   | 2   | 5   | 13    | 116    | 37     | 108    | 47     | 49    | 31    | 22    | 13     | 30    | 69     | 84     | 36    | 83    |
| <i>Pseudomonas vanderleydeniana</i>                          | 14    | 10  | 36    | 52    | 11  | 20  | 23  | 24    | 72     | 155    | 731    | 326    | 346   | 270   | 61    | 10     | 127   | 379    | 475    | 197   | 444   |
| <i>Pseudomonas waymouthensis</i>                             | 1     | 7   | 22    | 37    | 7   | 19  | 21  | 14    | 49     | 95     | 580    | 228    | 247   | 180   | 34    | 9      | 122   | 292    | 414    | 172   | 332   |
| <i>Pseudomonas venusta</i>                                   | 65    | 67  | 227   | 81    | 66  | 98  | 50  | 85    | 57     | 97     | 83     | 57     | 31    | 48    | 137   | 31     | 71    | 103    | 87     | 80    | 131   |
| <i>Pseudomonas xanthopygines</i>                             | 16    | 36  | 59    | 79    | 19  | 31  | 31  | 66    | 163    | 238    | 847    | 394    | 444   | 300   | 55    | 35     | 240   | 505    | 583    | 269   | 522   |
| <i>Pseudomonas xanthosoma</i>                                | 5     | 12  | 36    | 84    | 14  | 29  | 33  | 18    | 91     | 168    | 830    | 405    | 331   | 252   | 45    | 21     | 206   | 429    | 558    | 260   | 458   |
| <i>Pseudomonas yamanorum</i>                                 | 4     | 12  | 19    | 12    | 5   | 7   | 8   | 29    | 16     | 30     | 82     | 48     | 41    | 50    | 28    | 2      | 24    | 31     | 69     | 24    | 69    |
| <i>Pseudomonas</i> sp. <i>62C-26</i>                         | 3     | 5   | 34    | 37    | 17  | 17  | 23  | 13    | 25     | 93     | 486    | 213    | 189   | 166   | 20    | 7      | 95    | 241    | 336    | 153   | 231   |
| <i>Pseudomonas</i> sp. <i>1180SL</i>                         | 3     | 7   | 5     | 5     | 2   | 1   | 4   | 2     | 1      | 4      | 0      | 1      | 0     | 1     | 0     | 1      | 0     | 1      | 0      | 1     | 0     |
| <i>Pseudomonas</i> sp. <i>1119349</i>                        | 273   | 587 | 687   | 851   | 256 | 106 | 167 | 1,223 | 38,158 | 7,002  | 6,136  | 3,950  | 1,105 | 410   | 2,887 | 12,520 | 7,383 | 4,923  | 4,977  | 1,103 | 580   |
| <i>Pseudomonas</i> sp. <i>2hn</i>                            | 11    | 21  | 40    | 95    | 12  | 27  | 31  | 18    | 223    | 263    | 903    | 396    | 480   | 368   | 67    | 54     | 260   | 460    | 688    | 271   | 543   |
| <i>Pseudomonas</i> sp. <i>43A</i>                            | 9     | 21  | 41    | 52    | 12  | 9   | 27  | 27    | 141    | 132    | 357    | 224    | 135   | 122   | 50    | 43     | 155   | 251    | 320    | 112   | 167   |
| <i>Pseudomonas</i> sp. <i>A2</i>                             | 2     | 17  | 18    | 31    | 10  | 12  | 11  | 30    | 1,257  | 238    | 291    | 165    | 91    | 22    | 105   | 333    | 321   | 241    | 285    | 84    | 49    |
| <i>Pseudomonas</i> sp. <i>ABCI</i>                           | 26    | 26  | 129   | 36    | 30  | 26  | 22  | 38    | 20     | 60     | 125    | 69     | 104   | 57    | 4     | 85     | 103   | 77     | 58     | 133   | 58    |
| <i>Pseudomonas</i> sp. <i>ADPe</i>                           | 23    | 71  | 171   | 65    | 36  | 76  | 50  | 61    | 60     | 100    | 124    | 70     | 55    | 58    | 102   | 19     | 73    | 96     | 83     | 65    | 90    |
| <i>Pseudomonas</i> sp. <i>AN-B15</i>                         | 7     | 9   | 12    | 10    | 3   | 5   | 9   | 15    | 16     | 10     | 39     | 18     | 11    | 9     | 24    | 7      | 13    | 27     | 27     | 28    | 34    |
| <i>Pseudomonas</i> sp. <i>B1107D</i>                         | 14    | 30  | 124   | 18    | 27  | 49  | 29  | 42    | 37     | 51     | 64     | 60     | 35    | 33    | 47    | 10     | 45    | 62     | 71     | 43    | 75    |
| <i>Pseudomonas</i> sp. <i>BIOMG18AC</i>                      | 78    | 85  | 134   | 144   | 56  | 114 | 108 | 134   | 181    | 158    | 482    | 238    | 237   | 203   | 204   | 49     | 172   | 359    | 337    | 238   | 296   |
| <i>Pseudomonas</i> sp. <i>BUP49</i>                          | 19    | 54  | 73    | 68    | 25  | 48  | 44  | 41    | 571    | 480    | 687    | 450    | 263   | 48    | 66    | 142    | 542   | 612    | 527    | 214   | 80    |
| <i>Pseudomonas</i> sp. <i>BYT-1</i>                          | 21    | 24  | 30    | 74    | 21  | 23  | 33  | 93    | 602    | 205    | 591    | 389    | 219   | 179   | 144   | 111    | 247   | 417    | 584    | 167   | 239   |
| <i>Pseudomonas</i> sp. <i>CC6-YY-74</i>                      | 21    | 55  | 174   | 38    | 35  | 50  | 31  | 54    | 24     | 64     | 44     | 36     | 35    | 35    | 78    | 13     | 30    | 57     | 54     | 54    | 72    |
| <i>Pseudomonas</i> sp. <i>CCOS-191</i>                       | 5     | 24  | 33    | 57    | 20  | 35  | 22  | 15    | 117    | 219    | 799    | 365    | 422   | 258   | 53    | 49     | 184   | 445    | 553    | 266   | 467   |
| <i>Pseudomonas</i> sp. <i>CFSAN084952</i>                    | 6     | 6   | 32    | 108   | 10  | 11  | 32  | 13    | 49     | 84     | 96     | 65     | 39    | 390   | 28    | 9      | 27    | 53     | 67     | 64    | 268   |
| <i>Pseudomonas</i> sp. <i>CP-19</i>                          | 7     | 9   | 10    | 28    | 9   | 10  | 4   | 10    | 154    | 84     | 134    | 154    | 161   | 41    | 30    | 55     | 127   | 153    | 269    | 42    | 60    |
| <i>Pseudomonas</i> sp. <i>CMR3c</i>                          | 74    | 116 | 68    | 125   | 56  | 90  | 176 | 285   | 392    | 118    | 546    | 263    | 214   | 192   | 541   | 87     | 154   | 281    | 414    | 172   | 338   |
| <i>Pseudomonas</i> sp. <i>CT14</i>                           | 97    | 152 | 84    | 140   | 15  | 16  | 16  | 226   | 14     | 10     | 13     | 1      | 3     | 1     | 200   | 8      | 11    | 19     | 2      | 1     | 1     |
| <i>Pseudomonas</i> sp. <i>DY-1</i>                           | 10    | 28  | 87    | 20    | 19  | 22  | 18  | 25    | 28     | 53     | 79     | 27     | 21    | 33    | 33    | 12     | 42    | 70     | 59     | 55    | 69    |
| <i>Pseudomonas</i> sp. <i>FOAAARGOS_761</i>                  | 16    | 31  | 27    | 39    | 27  | 38  | 65  | 27    | 51     | 36     | 51     | 46     | 28    | 30    | 54    | 13     | 49    | 81     | 62     | 51    | 43    |
| <i>Pseudomonas</i> sp. <i>FOH2</i>                           | 4     | 9   | 20    | 48    | 10  | 9   | 9   | 18    | 289    | 153    | 486    | 262    | 180   | 78    | 21    | 68     | 222   | 505    | 461    | 141   | 139   |
| <i>Pseudomonas</i> sp. <i>gcc27</i>                          | 516   | 539 | 265   | 507   | 135 | 164 | 147 | 820   | 158    | 88     | 247    | 90     | 47    | 39    | 676   | 47     | 82    | 212    | 99     | 94    | 168   |
| <i>Pseudomonas</i> sp. <i>HLS-6</i>                          | 1,121 | 323 | 780   | 570   | 139 | 160 | 219 | 2,506 | 4,844  | 2,487  | 23,721 | 17,050 | 1,120 | 1,046 | 2,781 | 905    | 2,416 | 2,402  | 2,835  | 1,216 | 1,883 |
| <i>Pseudomonas</i> sp. <i>HS-18</i>                          | 127   | 249 | 235   | 337   | 107 | 148 | 208 | 238   | 360    | 779    | 1,165  | 651    | 467   | 287   | 322   | 175    | 1,521 | 1,745  | 932    | 612   | 380   |
| <i>Pseudomonas</i> sp. <i>J388</i>                           | 16    | 16  | 40    | 77    | 38  | 29  | 58  | 13    | 106    | 58     | 97     | 82     | 108   | 1,005 | 24    | 16     | 31    | 68     | 129    | 184   | 1,068 |
| <i>Pseudomonas</i> sp. <i>MRSB602</i>                        | 6     | 12  | 37    | 97    | 38  | 18  | 16  | 26    | 429    | 388    | 1,026  | 839    | 215   | 90    | 183   | 113    | 535   | 1,055  | 1,022  | 258   | 165   |
| <i>Pseudomonas</i> sp. <i>MJNC1626</i>                       | 1     | 9   | 28    | 23    | 5   | 6   | 16  | 18    | 5      | 36     | 104    | 46     | 55    | 53    | 21    | 4      | 21    | 55     | 86     | 40    | 72    |
| <i>Pseudomonas</i> sp. <i>KU43P</i>                          | 8     | 12  | 27    | 79    | 18  | 16  | 34  | 23    | 155    | 211    | 863    | 420    | 402   | 282   | 48    | 39     | 237   | 495    | 668    | 269   | 453   |
| <i>Pseudomonas</i> sp. <i>LS85</i>                           | 5     | 10  | 27    | 21    | 3   | 8   | 14  | 11    | 25     | 46     | 242    | 109    | 77    | 73    | 23    | 7      | 52    | 142    | 165    | 72    | 123   |
| <i>Pseudomonas</i> sp. <i>Lea58</i>                          | 3     | 11  | 28    | 38    | 19  | 10  | 9   | 15    | 191    | 135    | 457    | 240    | 194   | 123   | 37    | 40     | 206   | 348    | 374    | 154   | 175   |
| <i>Pseudomonas</i> sp. <i>LPB268</i>                         | 34    | 43  | 243   | 32    | 59  | 78  | 42  | 60    | 33     | 74     | 83     | 74     | 36    | 44    | 105   | 9      | 62    | 90     | 109    | 110   | 118   |
| <i>Pseudomonas</i> sp. <i>LPH1</i>                           | 33    | 35  | 162   | 43    | 40  | 65  | 28  | 44    | 29     | 56     | 53     | 54     | 28    | 32    | 72    | 12     | 61    | 66     | 56     | 57    | 73    |
| <i>Pseudomonas</i> sp. <i>LS</i>                             | 6     | 5   | 26    | 81    | 13  | 20  | 18  | 16    | 246    | 199    | 747    | 477    | 336   | 147   | 34    | 53     | 316   | 613    | 710    | 232   | 275   |
| <i>Pseudomonas</i> sp. <i>LS44</i>                           | 19    | 31  | 90    | 24    | 28  | 40  | 22  | 38    | 28     | 54     | 64     | 37     | 37    | 44    | 48    | 12     | 36    | 92     | 68     | 71    | 54    |
| <i>Pseudomonas</i> sp. <i>LTGT-11-2Z</i>                     | 61    | 120 | 1,095 | 1,952 | 437 | 247 | 116 | 206   | 13,886 | 11,874 | 9,889  | 12,359 | 4,847 | 1,203 | 422   | 2,157  | 2,045 | 22,525 | 20,646 | 4,055 | 1,477 |
| <i>Pseudomonas</i> sp. <i>M1</i>                             | 27    | 66  | 70    | 63    | 27  | 61  | 53  | 40    | 35     | 67     | 115    | 64     | 78    | 62    | 66    | 7      | 67    | 119    | 88     | 75    | 102   |
| <i>Pseudomonas</i> sp. <i>M30-35</i>                         | 10    | 11  | 10    | 11    | 4   | 2   | 3   | 21    | 1      | 3      | 3      | 8      | 3     | 2     | 15    | 3      | 2     | 5      | 3      | 2     | 2     |
| <i>Pseudomonas</i> sp. <i>Marseille-Q3773</i>                | 4     | 5   | 28    | 46    | 12  | 14  | 17  | 13    | 67     | 101    | 411    | 230    | 219   | 139   | 29    | 14     | 136   | 243    | 358    | 139   | 240   |
| <i>Pseudomonas</i> sp. <i>MM211</i>                          | 6     | 12  | 34    | 9     | 12  | 9   | 6   | 11    | 10     | 36     | 44     | 23     | 17    | 27    | 28    | 5      | 26    | 31     | 29     | 17    | 41    |
| <i>Pseudomonas</i> sp. <i>MP05</i>                           | 55    | 67  | 93    | 69    | 28  | 64  | 55  | 57    | 107    | 115    | 146    | 115    | 73    | 57    | 108   | 16     | 127   | 220    | 129    | 123   | 94    |
| <i>Pseudomonas</i> sp. <i>MIRCP1333</i>                      | 315   | 408 | 844   | 481   | 245 | 301 | 329 | 531   | 384    | 791    | 886    | 443    | 270   | 260   | 719   | 128    | 465   | 909    | 611    | 416   | 429   |
| <i>Pseudomonas</i> sp. <i>MIRSN12121</i>                     | 46    | 68  | 66    | 101   | 51  | 33  | 42  | 98    | 104    | 83     | 277    | 142    | 117   | 84    | 166   | 24     | 96    | 184    | 252    | 103   | 126   |
| <i>Pseudomonas</i> sp. <i>MSpm1</i>                          | 22    | 31  | 111   | 24    | 34  | 32  | 21  | 37    | 21     | 44     | 66     |        |       |       |       |        |       |        |        |       |       |
