# Supplementary material for: Performance of a Pilot-Scale Continuous Flow Ozone-Based Hospital Wastewater Treatment System
Source: MDPI journal article supplement (doi:10.3390/antibiotics12050932), 2023-05-19
Supplement: s1 [file s1]

**Table S6. LC-MS/MS parameters and validations of each antimicrobial**

|                    |                                                                   |                    |       |       |                |                     |                   |                  |                       |
|--------------------|-------------------------------------------------------------------|--------------------|-------|-------|----------------|---------------------|-------------------|------------------|-----------------------|
| LC                 | Waters ACQUITY UPLC™                                              |                    |       |       | Injection      | 10 µL               |                   |                  |                       |
| Column             | Waters AQUITY UPLC BEH C <sub>18</sub><br>2.1 mm × 100 mm, 1.7 µm |                    |       |       | MS/MS          | Waters ACQUITY TQD  |                   |                  |                       |
| Column Temperature | 60°C                                                              |                    |       |       | Ionization     | ESI - Positive ion  |                   |                  |                       |
| Mobile Phase       | A : 0.1% HCOOH                                                    |                    |       |       |                |                     |                   |                  |                       |
|                    | B : MeOH                                                          |                    |       |       |                |                     |                   |                  |                       |
| Gradient           | Time (min)                                                        | Flow rate (mL/min) | A (%) | B (%) | Antimicrobials | Precursor ion (m/z) | Product ion (m/z) | Cone voltage (V) | Collision energy (eV) |
|                    | 0.0                                                               | 0.35               | 90    | 10    | Ampicillin     | 350.2               | 105.9, 192.0      | 29               | 24                    |
|                    | 2.0                                                               | 0.35               | 90    | 10    | Levofloxacin   | 362.2               | 261.2, 318.2      | 40               | 21                    |
|                    | 8.0                                                               | 0.35               | 75    | 25    | Azithromycin   | 749.8               | 591.6, 277.3      | 49               | 31                    |
|                    | 14.0                                                              | 0.35               | 45    | 55    | Clarithromycin | 748.2               | 316.6, 558.3      | 38               | 18                    |
|                    | 16.0                                                              | 0.35               | 45    | 55    | Doxycycline    | 445.2               | 428.3             | 32               | 18                    |
|                    | 19.0                                                              | 0.35               | 10    | 90    | Vancomycin     | 724.2               | 82.9, 100.2       | 17               | 18                    |
|                    | 19.2                                                              | 0.35               | 0     | 100   |                |                     |                   |                  |                       |
|                    | 21.2                                                              | 0.35               | 0     | 100   |                |                     |                   |                  |                       |
|                    | 24.0                                                              | 0.35               | 90    | 10    |                |                     |                   |                  |                       |
|                    | 26.0                                                              | 0.35               | 90    | 10    |                |                     |                   |                  |                       |

Product ions in italics were used for quantification
