# Supplementary material for: Performance of a Pilot-Scale Continuous Flow Ozone-Based Hospital Wastewater Treatment System
Source: MDPI journal article supplement (doi:10.3390/antibiotics12050932), 2023-05-19
Supplement: s1 [file s1]

**Table S7. Validation of the method characteristics for analysis of antimicrobials in wastewater**

| Classification   | Antimicrobials | Recovery (%)<br>(SD, n=3) | LOD<br>(ng/L) | LOQ<br>(ng/L) | Calibration range<br>(ng/mL) | Correlation<br>coefficient ( $r^2$ ) |
|------------------|----------------|---------------------------|---------------|---------------|------------------------------|--------------------------------------|
| $\beta$ -lactams | Ampicillin     | 108 (7)                   | 1.6           | 5.4           | 0.5-200                      | 0.99                                 |
| New quinolones   | Levofloxacin   | 84 (28)                   | 0.3           | 1.0           | 0.5-200                      | 0.99                                 |
| Macrolides       | Azithromycin   | 95 (5)                    | 0.3           | 1.1           | 0.5-200                      | 0.99                                 |
|                  | Clarithromycin | 104 (7)                   | 0.5           | 1.6           | 0.5-200                      | 0.99                                 |
| Tetracyclines    | Doxycycline    | 94 (1)                    | 0.3           | 1.0           | 0.5-200                      | 0.99                                 |
| Glycopeptides    | Vancomycin     | 77 (17)                   | 0.6           | 1.9           | 0.5-200                      | 0.99                                 |
