# Supplementary material for: Performance of a Pilot-Scale Continuous Flow Ozone-Based Hospital Wastewater Treatment System
Source: MDPI journal article supplement (doi:10.3390/antibiotics12050932), 2023-05-19
Supplement: s1 [file s1]

**Table S8. Concentrations of targeted antimicrobials in hospital wastewater during continuous flow treatment (N.D.: Not detected) (A; original storage tank (Influent), B; wastewater treatment tank 1 (ozone), and C; wastewater treatment tank 2 (UV-LED))**

A)

| Classification   | Antimicrobials | Inactivation time (day) |        |        |        |       |        |         |
|------------------|----------------|-------------------------|--------|--------|--------|-------|--------|---------|
|                  |                | 0                       | 1      | 4      | 6      | 8     | 15     | 29      |
| $\beta$ -lactams | Ampicillin     | 11,196                  | 29,551 | 12,316 | 76,288 | 2,481 | 44,592 | 100,784 |
|                  | Levofloxacin   | 20,530                  | 13,726 | 5,312  | 1,972  | 1,308 | 3,996  | 9,746   |
| Macrolides       | Azithromycin   | 3,540                   | 1,676  | 846    | 102    | 164   | 576    | 427     |
|                  | Clarithromycin | 1,273                   | 202    | 723    | 1,265  | 3,848 | 982    | 1,440   |
| Tetracyclines    | Doxycycline    | 1,163                   | 291    | 244    | 177    | 45    | 47     | 13      |
| Glycopeptides    | Vancomycin     | 10,259                  | 4,666  | 5,834  | 4,422  | 2,919 | 2,548  | 14,252  |

B)

| Classification   | Antimicrobials | Inactivation time (day) |        |       |        |       |        |       |
|------------------|----------------|-------------------------|--------|-------|--------|-------|--------|-------|
|                  |                | 0                       | 1      | 4     | 4      | 8     | 15     | 29    |
| $\beta$ -lactams | Ampicillin     | 37,870                  | 35,072 | 3,180 | 51,526 | 6,270 | 65,598 | 7,482 |
|                  | Levofloxacin   | 8,960                   | 360    | 910   | 417    | 577   | 827    | 418   |
| Macrolides       | Azithromycin   | 746                     | 0      | N.D.  | N.D.   | N.D.  | N.D.   | N.D.  |
|                  | Clarithromycin | 1,331                   | 251    | 233   | 212    | 113   | 131    | 171   |
| Tetracyclines    | Doxycycline    | 1,217                   | 0      | N.D.  | N.D.   | N.D.  | N.D.   | N.D.  |
| Glycopeptides    | Vancomycin     | 11,033                  | 156    | 369   | 194    | 111   | 111    | 365   |

C)

| Classification   | Antimicrobials | Inactivation time (day) |        |       |       |        |       |       |
|------------------|----------------|-------------------------|--------|-------|-------|--------|-------|-------|
|                  |                | 0                       | 1      | 4     | 4     | 8      | 15    | 29    |
| $\beta$ -lactams | Ampicillin     | 4,684                   | 33,412 | 3,310 | 4,216 | 16,132 | 9,430 | 2,143 |
|                  | Levofloxacin   | 11,304                  | 148    | 88    | 170   | 330    | 427   | 350   |
| Macrolides       | Azithromycin   | 1,250                   | 0      | N.D.  | N.D.  | N.D.   | N.D.  | N.D.  |
|                  | Clarithromycin | 1,532                   | 200    | 240   | 344   | 298    | 190   | 210   |
| Tetracyclines    | Doxycycline    | 1,033                   | 0      | N.D.  | N.D.  | N.D.   | N.D.  | N.D.  |
| Glycopeptides    | Vancomycin     | 11,761                  | 354    | 255   | 244   | 604    | 219   | 73    |

N.D.: Not detected
