# Supplementary material for: Performance of a Pilot-Scale Continuous Flow Ozone-Based Hospital Wastewater Treatment System
Source: MDPI journal article supplement (doi:10.3390/antibiotics12050932), 2023-05-19
Supplement: s1 [file s1]

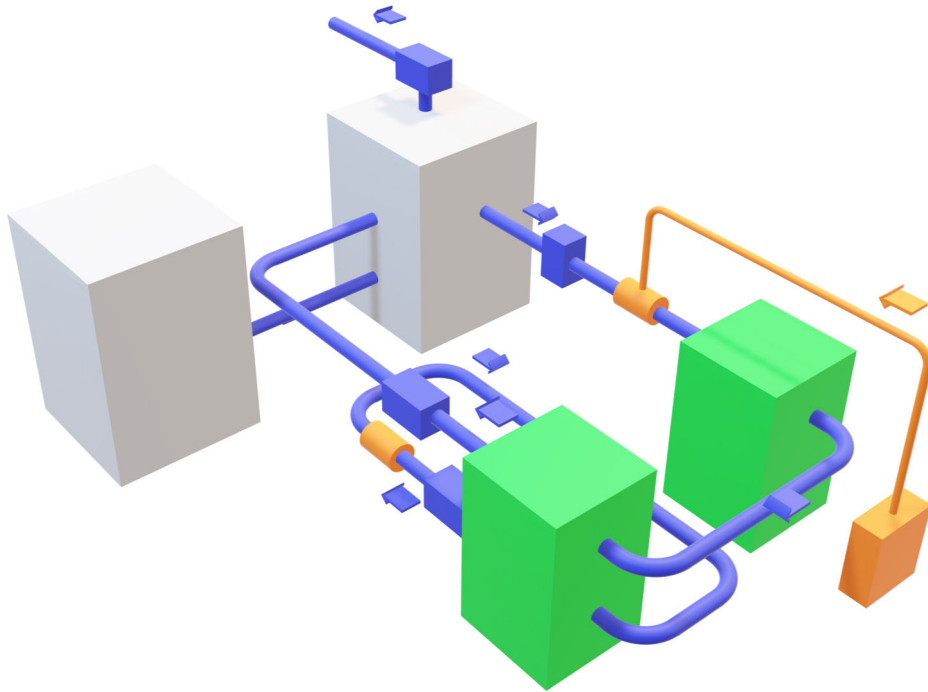

**Figure S1.** A 3D view of the equipment of the continuous-flow pilot-scale ozone treatment system was implemented in a hospital facility.
